# Supplementary material for: Evolutionary Analysis of the B56 Gene Family of PP2A Regulatory Subunits
Source: MDPI journal article supplement (doi:10.3390/ijms160510134), 2015-05-05
Supplement: s1 [file s1]

# Supplementary Information

CLUSTAL 2.1 multiple sequence alignment

|                                |       |
|--------------------------------|-------|
| gi Aspergillus_niger_N/A       | ----- |
| gi Aspergillus_nidulans_parA   | ----- |
| gi Mus_musculus_alpha          | ----- |
| gi Rattus_norvegicus_alpha     | ----- |
| gi Macaca_mulatta_alpha        | ----- |
| gi Homo_sapiens_alpha          | ----- |
| gi Ovis_aries_alpha            | ----- |
| gi Bos_taurus_alpha            | ----- |
| gi Felis_catus_alpha           | ----- |
| gi Canis_lupus_familiaris_alph | ----- |
| gi Falco_peregrinus_alpha      | ----- |
| gi Gallus_gallus_alpha         | ----- |
| gi Alligator_mississippiensis_ | ----- |
| gi Chrysemys_picta_bellii_alph | ----- |
| gi Xenopus_laevis_alpha        | ----- |
| gi Xenopus_tropicalis_alpha    | ----- |
| gi Ambystoma_mexicanum_alpha   | ----- |
| gi Danio_rerio_alpha           | ----- |
| gi Petromyzon_marinus_S4RHV1   | ----- |
| gi Mus_musculus_epsilon        | ----- |
| gi Rattus_norvegicus_epsilon   | ----- |
| gi Macaca_mulatta_epsilon      | ----- |
| gi Homo_sapiens_epsilon        | ----- |
| gi Ovis_arie_epsilon           | ----- |
| gi Bos_taurus_epsilon          | ----- |
| gi Canis_lupus_familiaris_epsi | ----- |
| gi Falco_peregrinus_epsilon    | ----- |
| gi Gallus_gallus_epsilon       | ----- |
| gi Felis_catus_epsilon         | ----- |
| gi Chrysemys_picta_bellii_epsi | ----- |
| gi Xenopus_laevis_epsilon      | ----- |
| gi Xenopus_tropicalis_epsilon  | ----- |
| gi Alligator_mississippiensis_ | ----- |
| gi Ambystoma_mexicanum_epsilon | ----- |
| gi Danio_rerio_epsilon         | ----- |
| gi Mus_musculus_beta           | ----- |
| gi Rattus_norvegicus_beta      | ----- |
| gi Felis_catus_beta            | ----- |
| gi Canis_lupus_familiaris_beta | ----- |
| gi Homo_sapiens_beta           | ----- |
| gi Bos_taurus_beta             | ----- |
| gi Ovis_aries_beta             | ----- |
| gi Macaca_mulatta_beta         | ----- |
| gi Xenopus_laevis_beta         | ----- |
| gi Alligator_mississippiensis_ | ----- |
| gi Chrysemys_picta_bellii_beta | ----- |
| gi Xenopus_tropicalis_beta     | ----- |
| gi Danio_rerio_beta            | ----- |
| gi Ambystoma_mexicanum_beta    | ----- |
| gi Petromyzon_marinus_S4RGA7   | ----- |
| gi Strongylocentrotus_purpurat | ----- |
| gi Drosophila_melanogaster_wdb | ----- |
| jgi Branchiostoma_floridae_237 | ----- |
| gi Hydra_vulgaris_alpha        | ----- |
| jgi Branchiostoma_floridae_112 | ----- |
| jgi Branchiostoma_floridae_284 | ----- |
| gi Caenorhabditis_elegans_PPTR | ----- |

Figure S1. *Cont.*

|                                |                                                     |    |
|--------------------------------|-----------------------------------------------------|----|
| gi Amphimedon_queenslandica_be | -----                                               |    |
| gi Chrysemys_picta_bellii_gamm | -----                                               |    |
| gi Chrysemys_picta_bellii_delt | -----                                               |    |
| gi Falco_peregrinus_gamma      | -----                                               |    |
| gi Falco_peregrinus_delta/gamm | -----                                               |    |
| gi Gallus_gallus_gamma         | -----                                               |    |
| gi Alligator_mississippiensis_ | -----                                               |    |
| gi Alligator_mississippiensis_ | -----                                               |    |
| gi Ambystoma_mexicanum_gamma   | -----                                               |    |
| gi Mus_musculus_gamma          | -----                                               |    |
| gi Rattus_norvegicus_gamma     | -----                                               |    |
| gi Ovis_aries_gamma            | -----                                               |    |
| gi Bos_taurus_gamma            | -----                                               |    |
| gi Canis_lupus_familiaris_gamm | -----                                               |    |
| gi Macaca_mulatta_gamma        | -----                                               |    |
| gi Homo_sapiens_gamma          | -----                                               |    |
| gi Felis_catus_gamma           | -----                                               |    |
| gi Canis_lupus_familiaris_delt | -----                                               |    |
| gi Macaca_mulatta_delta/gamma  | MAQGAATGRGIPLQATVAEAGPVDFFPDTSQNSVSPEGRGGKGQAVHAERQ | 50 |
| gi Bos_taurus_delta/gamma      | -----                                               |    |
| gi Mus_musculus_delta/gamma    | -----                                               |    |
| gi Rattus_norvegicus_delta/gam | -----                                               |    |
| gi Danio_rerio_gamma           | -----                                               |    |
| gi Danio_rerio_delta/gamma     | -----                                               |    |
| gi Xenopus_laevis_delta/gamma  | -----                                               |    |
| gi Xenopus_laevis_gamma        | -----                                               |    |
| gi Xenopus_tropicalis_delta/ga | -----                                               |    |
| gi Mus_musculus_delta          | -----                                               |    |
| gi Rattus_norvegicus_delta     | -----                                               |    |
| gi Felis_catus_delta           | -----                                               |    |
| gi Bos_taurus_delta            | -----                                               |    |
| gi Canis_lupus_familiaris_delt | -----                                               |    |
| gi Macaca_mulatta_delta        | -----                                               |    |
| gi Homo_sapiens_delta          | -----                                               |    |
| gi Ovis_aries_delta            | -----                                               |    |
| gi Falco_peregrinus_delta      | -----                                               |    |
| gi Gallus_gallus_delta         | -----                                               |    |
| gi Alligator_mississippiensis_ | -----                                               |    |
| gi Chrysemys_picta_bellii_delt | -----                                               |    |
| gi Danio_rerio_delta           | -----                                               |    |
| gi Ambystoma_mexicanum_delta   | -----                                               |    |
| gi Petromyzon_marinus_S4RN43   | -----                                               |    |
| jgi Branchiostoma_floridae_237 | -----                                               |    |
| jgi Branchiostoma_floridae_252 | -----                                               |    |
| gi Strongylocentrotus_purpurat | -----                                               |    |
| gi Caenorhabditis_elegans_PPTR | -----                                               |    |
| gi Hydra_vulgaris_delta        | -----                                               |    |
| gi Amphimedon_queenslandica_de | -----                                               |    |
| gi Drosophila_melanogaster_B56 | -----                                               |    |
| gi Dictyostelium_discoideum_ps | -----                                               |    |
| gi Dictyostelium_purpureum_N/A | -----                                               |    |
| gi Dictyostelium_fasciculatum_ | -----                                               |    |
| gi Polysphondylium_pallidum_N/ | -----                                               |    |
| gi Arabidopsis_thaliana_theta  | -----                                               |    |
| gi Arabidopsis_thaliana_eta    | -----                                               |    |
| gi Arabidopsis_thaliana_zeta   | -----                                               |    |
| gi Arabidopsis_thaliana_gamma  | -----                                               |    |
| gi Oryza                       | -----                                               |    |
| gi Oryza_sativa_zeta           | -----                                               |    |
| gi Oryza_sativa_theta          | -----                                               |    |
| gi Oryza_sativa_eta            | -----                                               |    |

Figure S1. Cont.

|    |                                |       |
|----|--------------------------------|-------|
| gi | Arabidopsis_thaliana_delta     | ----- |
| gi | Arabidopsis_thaliana_N/A       | ----- |
| gi | Oryza_sativa_kappa             | ----- |
| gi | Oryza_sativa_N/A               | ----- |
| gi | Arabidopsis_thaliana_alpha     | ----- |
| gi | Arabidopsis_thaliana_beta      | ----- |
| gi | Oryza_sativa_N/A_2             | ----- |
| gi | Arabidopsis_thaliana_epsilon   | ----- |
| gi | Chlamydomonas_reinhardtii_w    | ----- |
| gi | Schizosaccharomyces_pombe_P    | ----- |
| gi | Schizosaccharomyces_pombe_P    | ----- |
| gi | Ashbya_gossypii_RTS1           | ----- |
| gi | Saccharomyces_cerevisiae_RT    | ----- |
|    |                                |       |
| gi | Aspergillus_niger_N/A          | ----- |
| gi | Aspergillus_nidulans_para      | ----- |
| gi | Mus_musculus_alpha             | ----- |
| gi | Rattus_norvegicus_alpha        | ----- |
| gi | Macaca_mulatta_alpha           | ----- |
| gi | Homo_sapiens_alpha             | ----- |
| gi | Ovis_aries_alpha               | ----- |
| gi | Bos_taurus_alpha               | ----- |
| gi | Felis_catus_alpha              | ----- |
| gi | Canis_lupus_familiaris_alph    | ----- |
| gi | Falco_peregrinus_alpha         | ----- |
| gi | Gallus_gallus_alpha            | ----- |
| gi | Alligator_mississippiensis     | ----- |
| gi | Chrysemys_picta_bellii_alph    | ----- |
| gi | Xenopus_laevis_alpha           | ----- |
| gi | Xenopus_tropicalis_alpha       | ----- |
| gi | Ambystoma_mexicanum_alpha      | ----- |
| gi | Danio_rerio_alpha              | ----- |
| gi | Petromyzon_marinus_S4RHV1      | ----- |
| gi | Mus_musculus_epsilon           | ----- |
| gi | Rattus_norvegicus_epsilon      | ----- |
| gi | Macaca_mulatta_epsilon         | ----- |
| gi | Homo_sapiens_epsilon           | ----- |
| gi | Ovis_aries_epsilon             | ----- |
| gi | Bos_taurus_epsilon             | ----- |
| gi | Canis_lupus_familiaris_epsilon | ----- |
| gi | Falco_peregrinus_epsilon       | ----- |
| gi | Gallus_gallus_epsilon          | ----- |
| gi | Felis_catus_epsilon            | ----- |
| gi | Chrysemys_picta_bellii_epsilon | ----- |
| gi | Xenopus_laevis_epsilon         | ----- |
| gi | Xenopus_tropicalis_epsilon     | ----- |
| gi | Alligator_mississippiensis     | ----- |
| gi | Ambystoma_mexicanum_epsilon    | ----- |
| gi | Danio_rerio_epsilon            | ----- |
| gi | Mus_musculus_beta              | ----- |
| gi | Rattus_norvegicus_beta         | ----- |
| gi | Felis_catus_beta               | ----- |
| gi | Canis_lupus_familiaris_beta    | ----- |
| gi | Homo_sapiens_beta              | ----- |
| gi | Bos_taurus_beta                | ----- |
| gi | Ovis_aries_beta                | ----- |
| gi | Macaca_mulatta_beta            | ----- |
| gi | Xenopus_laevis_beta            | ----- |
| gi | Alligator_mississippiensis     | ----- |
| gi | Chrysemys_picta_bellii_beta    | ----- |

Figure S1. *Cont.*

|                                 |                                                        |
|---------------------------------|--------------------------------------------------------|
| gi Xenopus_tropicalis_beta      | -----                                                  |
| gi Danio_rerio_beta             | -----                                                  |
| gi Ambystoma_mexicanum_beta     | -----                                                  |
| gi Petromyzon_marinus_S4RGA7    | -----                                                  |
| gi Strongylocentrotus_purpurat  | -----                                                  |
| gi Drosophila_melanogaster_wdb  | -----                                                  |
| jgi Branchiostoma_floridiae_237 | -----                                                  |
| gi Hydra_vulgaris_alpha         | -----                                                  |
| jgi Branchiostoma_floridiae_112 | -----                                                  |
| jgi Branchiostoma_floridiae_284 | -----                                                  |
| gi Caenorhabditis_elegans_PPTR  | -----                                                  |
| gi Amphimedon_queenslandica_be  | -----                                                  |
| gi Chrysemys_picta_bellii_gamm  | -----                                                  |
| gi Chrysemys_picta_bellii_delt  | -----                                                  |
| gi Falco_peregrinus_gamma       | -----                                                  |
| gi Falco_peregrinus_delta/gamm  | -----                                                  |
| gi Gallus_gallus_gamma          | -----                                                  |
| gi Alligator_mississippiensis_  | -----                                                  |
| gi Alligator_mississippiensis_  | -----                                                  |
| gi Ambystoma_mexicanum_gamma    | -----                                                  |
| gi Mus_musculus_gamma           | -----                                                  |
| gi Rattus_norvegicus_gamma      | -----                                                  |
| gi Ovis_aries_gamma             | -----                                                  |
| gi Bos_taurus_gamma             | -----                                                  |
| gi Canis_lupus_familiaris_gamm  | -----                                                  |
| gi Macaca_mulatta_gamma         | -----                                                  |
| gi Homo_sapiens_gamma           | -----                                                  |
| gi Felis_catus_gamma            | -----                                                  |
| gi Canis_lupus_familiaris_delt  | -----                                                  |
| gi Macaca_mulatta_delta/gamma   | SLQVCQDGVVTWKRIIFTGAGGCSLSKMQWRFSLSPHEGEAPMPLAREIR 100 |
| gi Bos_taurus_delta/gamma       | -----                                                  |
| gi Mus_musculus_delta/gamma     | -----                                                  |
| gi Rattus_norvegicus_delta/gam  | -----                                                  |
| gi Danio_rerio_gamma            | -----                                                  |
| gi Danio_rerio_delta/gamma      | -----                                                  |
| gi Xenopus_laevis_delta/gamma   | -----                                                  |
| gi Xenopus_laevis_gamma         | -----                                                  |
| gi Xenopus_tropicalis_delta/ga  | -----                                                  |
| gi Mus_musculus_delta           | -----                                                  |
| gi Rattus_norvegicus_delta      | -----                                                  |
| gi Felis_catus_delta            | -----                                                  |
| gi Bos_taurus_delta             | -----                                                  |
| gi Canis_lupus_familiaris_delt  | -----                                                  |
| gi Macaca_mulatta_delta         | -----                                                  |
| gi Homo_sapiens_delta           | -----                                                  |
| gi Ovis_aries_delta             | -----                                                  |
| gi Falco_peregrinus_delta       | -----                                                  |
| gi Gallus_gallus_delta          | -----                                                  |
| gi Alligator_mississippiensis_  | -----                                                  |
| gi Chrysemys_picta_bellii_delt  | -----                                                  |
| gi Danio_rerio_delta            | -----                                                  |
| gi Ambystoma_mexicanum_delta    | -----                                                  |
| gi Petromyzon_marinus_S4RN43    | -----                                                  |
| jgi Branchiostoma_floridiae_237 | -----                                                  |
| jgi Branchiostoma_floridiae_252 | -----                                                  |
| gi Strongylocentrotus_purpurat  | -----                                                  |
| gi Caenorhabditis_elegans_PPTR  | -----                                                  |
| gi Hydra_vulgaris_delta         | -----                                                  |
| gi Amphimedon_queenslandica_de  | -----                                                  |
| gi Drosophila_melanogaster_B56  | -----                                                  |
| gi Dictyostelium_discoideum_ps  | -----                                                  |

Figure S1. Cont.

|                                 |       |
|---------------------------------|-------|
| gi Dictyostelium_purpureum_N/A  | ----- |
| gi Dictyostelium_fasciculatum_  | ----- |
| gi Polysphondylium_pallidum_N/  | ----- |
| gi Arabidopsis_thaliana_theta   | ----- |
| gi Arabidopsis_thaliana_eta     | ----- |
| gi Arabidopsis_thaliana_zeta    | ----- |
| gi Arabidopsis_thaliana_gamma   | ----- |
| gi Oryza                        | ----- |
| gi Oryza_sativa_zeta            | ----- |
| gi Oryza_sativa_theta           | ----- |
| gi Oryza_sativa_eta             | ----- |
| gi Arabidopsis_thaliana_delta   | ----- |
| gi Arabidopsis_thaliana_N/A     | ----- |
| gi Oryza_sativa_kappa           | ----- |
| gi Oryza_sativa_N/A             | ----- |
| gi Arabidopsis_thaliana_alpha   | ----- |
| gi Arabidopsis_thaliana_beta    | ----- |
| gi Oryza_sativa_N/A_2           | ----- |
| gi Arabidopsis_thaliana_epsilon | ----- |
| gi Chlamydomonas_reinhardtii_w  | ----- |
| gi Schizosaccharomyces_pombe_P  | ----- |
| gi Schizosaccharomyces_pombe_P  | ----- |
| gi Ashbya_gossypii_RTS1         | ----- |
| gi Saccharomyces_cerevisiae_RT  | ----- |
|                                 |       |
| gi Aspergillus_niger_N/A        | ----- |
| gi Aspergillus_nidulans_parA    | ----- |
| gi Mus_musculus_alpha           | ----- |
| gi Rattus_norvegicus_alpha      | ----- |
| gi Macaca_mulatta_alpha         | ----- |
| gi Homo_sapiens_alpha           | ----- |
| gi Ovis_aries_alpha             | ----- |
| gi Bos_taurus_alpha             | ----- |
| gi Felis_catus_alpha            | ----- |
| gi Canis_lupus_familiaris_alph  | ----- |
| gi Falco_peregrinus_alpha       | ----- |
| gi Gallus_gallus_alpha          | ----- |
| gi Alligator_mississippiensis_  | ----- |
| gi Chrysemys_picta_bellii_alph  | ----- |
| gi Xenopus_laevis_alpha         | ----- |
| gi Xenopus_tropicalis_alpha     | ----- |
| gi Ambystoma_mexicanum_alpha    | ----- |
| gi Danio_rerio_alpha            | ----- |
| gi Petromyzon_marinus_S4RHV1    | ----- |
| gi Mus_musculus_epsilon         | ----- |
| gi Rattus_norvegicus_epsilon    | ----- |
| gi Macaca_mulatta_epsilon       | ----- |
| gi Homo_sapiens_epsilon         | ----- |
| gi Ovis_arie_epsilon            | ----- |
| gi Bos_taurus_epsilon           | ----- |
| gi Canis_lupus_familiaris_epsi  | ----- |
| gi Falco_peregrinus_epsilon     | ----- |
| gi Gallus_gallus_epsilon        | ----- |
| gi Felis_catus_epsilon          | ----- |
| gi Chrysemys_picta_bellii_epsi  | ----- |
| gi Xenopus_laevis_epsilon       | ----- |
| gi Xenopus_tropicalis_epsilon   | ----- |
| gi Alligator_mississippiensis_  | ----- |
| gi Ambystoma_mexicanum_epsilon  | ----- |
| gi Danio_rerio_epsilon          | ----- |

Figure S1. *Cont.*

|                                                   |       |
|---------------------------------------------------|-------|
| gi Mus_musculus_beta                              | ----- |
| gi Rattus_norvegicus_beta                         | ----- |
| gi Felis_catus_beta                               | ----- |
| gi Canis_lupus_familiaris_beta                    | ----- |
| gi Homo_sapiens_beta                              | ----- |
| gi Bos_taurus_beta                                | ----- |
| gi Ovis_aries_beta                                | ----- |
| gi Macaca_mulatta_beta                            | ----- |
| gi Xenopus_laevis_beta                            | ----- |
| gi Alligator_mississippiensis_beta                | ----- |
| gi Chrysemys_picta_bellii_beta                    | ----- |
| gi Xenopus_tropicalis_beta                        | ----- |
| gi Danio_rerio_beta                               | ----- |
| gi Ambystoma_mexicanum_beta                       | ----- |
| gi Petrotyzon_marinus_S4RGA7                      | ----- |
| gi Strongylocentrotus_purpurat                    | ----- |
| gi Drosophila_melanogaster_wdb                    | ----- |
| jgi Branchiostoma_floridae_237                    | ----- |
| gi Hydra_vulgaris_alpha                           | ----- |
| jgi Branchiostoma_floridae_112                    | ----- |
| jgi Branchiostoma_floridae_284                    | ----- |
| gi Caenorhabditis_elegans_PPTR                    | ----- |
| gi Amphimedon_queenslandica_be                    | ----- |
| gi Chrysemys_picta_bellii_gamm                    | ----- |
| gi Chrysemys_picta_bellii_delt                    | ----- |
| gi Falco_peregrinus_gamma                         | ----- |
| gi Falco_peregrinus_delta/gamm                    | ----- |
| gi Gallus_gallus_gamma                            | ----- |
| gi Alligator_mississippiensis_beta                | ----- |
| gi Alligator_mississippiensis_beta                | ----- |
| gi Ambystoma_mexicanum_gamma                      | ----- |
| gi Mus_musculus_gamma                             | ----- |
| gi Rattus_norvegicus_gamma                        | ----- |
| gi Ovis_aries_gamma                               | ----- |
| gi Bos_taurus_gamma                               | ----- |
| gi Canis_lupus_familiaris_gamm                    | ----- |
| gi Macaca_mulatta_gamma                           | ----- |
| gi Homo_sapiens_gamma                             | ----- |
| gi Felis_catus_gamma                              | ----- |
| gi Canis_lupus_familiaris_delt                    | ----- |
| gi Macaca_mulatta_delta/gamma                     | ----- |
| gi Bos_taurus_delta/gamma                         | ----- |
| gi Mus_musculus_delta/gamma                       | ----- |
| gi Rattus_norvegicus_delta/gam                    | ----- |
| gi Danio_rerio_gamma                              | ----- |
| gi Danio_rerio_delta/gamma                        | ----- |
| gi Xenopus_laevis_delta/gamma                     | ----- |
| gi Xenopus_laevis_gamma                           | ----- |
| gi Xenopus_tropicalis_delta/ga                    | ----- |
| gi Mus_musculus_delta                             | ----- |
| gi Rattus_norvegicus_delta                        | ----- |
| gi Felis_catus_delta                              | ----- |
| gi Bos_taurus_delta                               | ----- |
| gi Canis_lupus_familiaris_delt                    | ----- |
| gi Macaca_mulatta_delta                           | ----- |
| gi Homo_sapiens_delta                             | ----- |
| gi Ovis_aries_delta                               | ----- |
| gi Falco_peregrinus_delta                         | ----- |
| gi Gallus_gallus_delta                            | ----- |
| gi Alligator_mississippiensis_beta                | ----- |
| gi Chrysemys_picta_bellii_delt                    | ----- |
| TLLESYYLMHFRNPGRSLASPIVLGTRWTAEVLGHQVFEAWPRWAGPRP | 150   |

Figure S1. Cont.

|     |                              |                                    |    |
|-----|------------------------------|------------------------------------|----|
| gi  | Danio rerio_delta            | -----                              |    |
| gi  | Ambystoma_mexicanum_delta    | -----                              |    |
| gi  | Petromyzon_marinus_S4RN43    | -----                              |    |
| jgi | Branchiostoma_floridiae_237  | -----                              |    |
| jgi | Branchiostoma_floridiae_252  | -----                              |    |
| gi  | Strongylocentrotus_purpurat  | -----                              |    |
| gi  | Caenorhabditis_elegans_PPTR  | -----                              |    |
| gi  | Hydra_vulgaris_delta         | -----                              |    |
| gi  | Amphimedon_queenslandica_de  | -----                              |    |
| gi  | Drosophila_melanogaster_B56  | -----                              |    |
| gi  | Dictyostelium_discoideum_ps  | -----                              |    |
| gi  | Dictyostelium_purpureum_N/A  | -----                              |    |
| gi  | Dictyostelium_fasciculatum_  | -----                              |    |
| gi  | Polysphondylium_pallidum_N/  | -----                              |    |
| gi  | Arabidopsis_thaliana_theta   | -----                              |    |
| gi  | Arabidopsis_thaliana_eta     | -----                              |    |
| gi  | Arabidopsis_thaliana_zeta    | -----                              |    |
| gi  | Arabidopsis_thaliana_gamma   | -----                              |    |
| gi  | Oryza                        | -----                              |    |
| gi  | Oryza_sativa_zeta            | -----                              |    |
| gi  | Oryza_sativa_theta           | -----                              |    |
| gi  | Oryza_sativa_eta             | -----                              |    |
| gi  | Arabidopsis_thaliana_delta   | -----                              |    |
| gi  | Arabidopsis_thaliana_N/A     | -----                              |    |
| gi  | Oryza_sativa_kappa           | -----                              |    |
| gi  | Oryza_sativa_N/A             | -----                              |    |
| gi  | Arabidopsis_thaliana_alpha   | -----                              |    |
| gi  | Arabidopsis_thaliana_beta    | -----                              |    |
| gi  | Oryza_sativa_N/A_2           | -----                              |    |
| gi  | Arabidopsis_thaliana_epsilon | -----                              |    |
| gi  | Chlamydomonas_reinhardtii_w  | -----                              |    |
| gi  | Schizosaccharomyces_pombe_P  | -----                              |    |
| gi  | Schizosaccharomyces_pombe_P  | -----                              |    |
| gi  | Ashbya_gossypii_RTSl         | -----MMRGFKQKLIKTTGSSSSSTQ-KKKDKE- | 27 |
| gi  | Saccharomyces_cerevisiae_RT  | -----MMRGFKQRLIKTTGSSSSSSSKKKDKEK  | 29 |
|     |                              |                                    |    |
| gi  | Aspergillus_niger_N/A        | -----MKGFRQRVHEQLSRAKDANK          | 20 |
| gi  | Aspergillus_nidulans_parA    | -----MKGFRQRVHEQLSRAKDNKS          | 20 |
| gi  | Mus_musculus_alpha           | -----                              |    |
| gi  | Rattus_norvegicus_alpha      | -----                              |    |
| gi  | Macaca_mulatta_alpha         | -----                              |    |
| gi  | Homo_sapiens_alpha           | -----                              |    |
| gi  | Ovis_aries_alpha             | -----                              |    |
| gi  | Bos_taurus_alpha             | -----                              |    |
| gi  | Felis_catus_alpha            | -----                              |    |
| gi  | Canis_lupus_familiaris_alph  | -----                              |    |
| gi  | Falco_peregrinus_alpha       | -----                              |    |
| gi  | Gallus_gallus_alpha          | -----                              |    |
| gi  | Alligator_mississippiensis_  | -----                              |    |
| gi  | Chrysemys_picta_bellii_alph  | -----                              |    |
| gi  | Xenopus_laevis_alpha         | -----                              |    |
| gi  | Xenopus_tropicalis_alpha     | -----                              |    |
| gi  | Ambystoma_mexicanum_alpha    | -----                              |    |
| gi  | Danio_rerio_alpha            | -----                              |    |
| gi  | Petromyzon_marinus_S4RNV1    | -----                              |    |
| gi  | Mus_musculus_epsilon         | -----                              |    |
| gi  | Rattus_norvegicus_epsilon    | -----                              |    |
| gi  | Macaca_mulatta_epsilon       | -----                              |    |
| gi  | Homo_sapiens_epsilon         | -----                              |    |
| gi  | Ovis_aries_epsilon           | -----                              |    |

Figure S1. Cont.

|                                   |                                                   |     |
|-----------------------------------|---------------------------------------------------|-----|
| gi Bos_taurus_epsilon             | -----                                             |     |
| gi Canis_lupus_familiaris_epsilon | -----                                             |     |
| gi Falco_peregrinus_epsilon       | -----                                             |     |
| gi Gallus_gallus_epsilon          | -----                                             |     |
| gi Felis_catus_epsilon            | -----                                             |     |
| gi Chrysemys_picta_bellii_epsilon | -----                                             |     |
| gi Xenopus_laevis_epsilon         | -----                                             |     |
| gi Xenopus_tropicalis_epsilon     | -----                                             |     |
| gi Alligator_mississippiensis     | -----                                             |     |
| gi Ambystoma_mexicanum_epsilon    | -----                                             |     |
| gi Danio_rerio_epsilon            | -----                                             |     |
| gi Mus_musculus_beta              | -----                                             |     |
| gi Rattus_norvegicus_beta         | -----                                             |     |
| gi Felis_catus_beta               | -----                                             |     |
| gi Canis_lupus_familiaris_beta    | -----                                             |     |
| gi Homo_sapiens_beta              | -----                                             |     |
| gi Bos_taurus_beta                | -----                                             |     |
| gi Ovis_aries_beta                | -----                                             |     |
| gi Macaca_mulatta_beta            | -----                                             |     |
| gi Xenopus_laevis_beta            | -----                                             |     |
| gi Alligator_mississippiensis     | -----                                             |     |
| gi Chrysemys_picta_bellii_beta    | -----                                             |     |
| gi Xenopus_tropicalis_beta        | -----                                             |     |
| gi Danio_rerio_beta               | -----                                             |     |
| gi Ambystoma_mexicanum_beta       | -----                                             |     |
| gi Petromyzon_marinus_S4RGA7      | -----                                             |     |
| gi Strongylocentrotus_purpurat    | -----                                             |     |
| gi Drosophila_melanogaster_wdb    | -----                                             |     |
| jgi Branchiostoma_floridiae_237   | -----                                             |     |
| gi Hydra_vulgaris_alpha           | -----                                             |     |
| jgi Branchiostoma_floridiae_112   | -----                                             |     |
| jgi Branchiostoma_floridiae_284   | -----                                             |     |
| gi Caenorhabditis_elegans_PPTR    | -----                                             |     |
| gi Amphimedon_queenslandica_be    | -----                                             |     |
| gi Chrysemys_picta_bellii_gamm    | -----                                             |     |
| gi Chrysemys_picta_bellii_delt    | -----                                             |     |
| gi Falco_peregrinus_gamma         | -----                                             |     |
| gi Falco_peregrinus_delta/gamm    | -----                                             |     |
| gi Gallus_gallus_gamma            | -----                                             |     |
| gi Alligator_mississippiensis     | -----                                             |     |
| gi Alligator_mississippiensis     | -----                                             |     |
| gi Ambystoma_mexicanum_gamma      | -----                                             |     |
| gi Mus_musculus_gamma             | -----                                             |     |
| gi Rattus_norvegicus_gamma        | -----                                             |     |
| gi Ovis_aries_gamma               | -----                                             |     |
| gi Bos_taurus_gamma               | -----                                             |     |
| gi Canis_lupus_familiaris_gamm    | -----                                             |     |
| gi Macaca_mulatta_gamma           | -----                                             |     |
| gi Homo_sapiens_gamma             | -----                                             |     |
| gi Felis_catus_gamma              | -----                                             |     |
| gi Canis_lupus_familiaris_delt    | -----                                             |     |
| gi Macaca_mulatta_delta/gamma     | EERGCTSGRDLAEGAAEGGANGERRCRVCGTSPEELRRAGPTRKGRGCR | 200 |
| gi Bos_taurus_delta/gamma         | -----                                             |     |
| gi Mus_musculus_delta/gamma       | -----                                             |     |
| gi Rattus_norvegicus_delta/gam    | -----MPASSGRGRRQVVQARGRAQGAGRIAWSWGGRPGSEVALRCR   | 42  |
| gi Danio_rerio_gamma              | -----                                             |     |
| gi Danio_rerio_delta/gamma        | -----                                             |     |
| gi Xenopus_laevis_delta/gamma     | -----                                             |     |
| gi Xenopus_laevis_gamma           | -----                                             |     |
| gi Xenopus_tropicalis_delta/ga    | -----                                             |     |
| gi Mus_musculus_delta             | -----                                             |     |

Figure S1. Cont.



|                                 |                                                     |          |
|---------------------------------|-----------------------------------------------------|----------|
| gi Rattus_norvegicus_delta      | -----                                               |          |
| gi Felis_catus_delta            | -----                                               |          |
| gi Bos_taurus_delta             | -----                                               |          |
| gi Canis_lupus_familiaris_delt  | -----                                               |          |
| gi Macaca_mulatta_delta         | -----                                               |          |
| gi Homo_sapiens_delta           | -----                                               |          |
| gi Ovis_aries_delta             | -----                                               |          |
| gi Falco_peregrinus_delta       | -----                                               |          |
| gi Gallus_gallus_delta          | -----                                               |          |
| gi Alligator_mississippiensis   | -----                                               |          |
| gi Chrysemys_picta_bellii_delt  | -----                                               |          |
| gi Danio_rerio_delta            | -----                                               |          |
| gi Ambystoma_mexicanum_delta    | -----                                               |          |
| gi Petromyzon_marinus_S4RN43    | -----                                               |          |
| jgi Branchiostoma_floridae_237  | -----                                               |          |
| jgi Branchiostoma_floridae_252  | -----                                               |          |
| gi Strongylocentrotus_purpurat  | -----                                               |          |
| gi Caenorhabditis_elegans_PPTR  | -----                                               |          |
| gi Hydra_vulgaris_delta         | -----                                               | -MPV- 3  |
| gi Amphimedon_queenslandica_de  | -----                                               | -MMPIG 5 |
| gi Drosophila_melanogaster_B56  | --MDNEALDPTIKSSTSAAATPTAAASETTTAAASSVVETTTTIAAATASA | 48       |
| gi Dictyostelium_discoideum_ps  | -----                                               |          |
| gi Dictyostelium_purpureum_N/A  | -----                                               |          |
| gi Dictyostelium_fasciculatum   | -----                                               |          |
| gi Polysphondylium_pallidum_N/  | -----                                               |          |
| gi Arabidopsis_thaliana_theta   | -----                                               |          |
| gi Arabidopsis_thaliana_eta     | -----                                               |          |
| gi Arabidopsis_thaliana_zeta    | -----                                               |          |
| gi Arabidopsis_thaliana_gamma   | -----                                               |          |
| gi Oryza                        | -----                                               |          |
| gi Oryza_sativa_zeta            | -----                                               |          |
| gi Oryza_sativa_theta           | -----                                               |          |
| gi Oryza_sativa_eta             | -----                                               |          |
| gi Arabidopsis_thaliana_delta   | -----                                               |          |
| gi Arabidopsis_thaliana_N/A     | -----                                               |          |
| gi Oryza_sativa_kappa           | -----                                               |          |
| gi Oryza_sativa_N/A             | -----                                               |          |
| gi Arabidopsis_thaliana_alpha   | -----                                               |          |
| gi Arabidopsis_thaliana_beta    | -----                                               |          |
| gi Oryza_sativa_N/A_2           | -----                                               |          |
| gi Arabidopsis_thaliana_epsilon | -----                                               |          |
| gi Chlamydomonas_reinhardtii_w  | -----                                               |          |
| gi Schizosaccharomyces_pombe_P  | -----MKGIKSKMLSRGKSQDTQKSSKKKESK-----               | 27       |
| gi Schizosaccharomyces_pombe_P  | -----MKGLRSKFVKALSLKDEQGSHKNGHSHYISKNGSYVETD        | 41       |
| gi Ashbya_gossypii_RTS1         | -----TGKKPGSANGAAG-----AVGSGGRATVDKKEQKGSAGAK       | 62       |
| gi Saccharomyces_cerevisiae_RT  | EKEKSSTTSSTSKKPASASSSHGTTTHSSASSTGSKSTTEKGKQSGSVPS  | 79       |
|                                 |                                                     |          |
| gi Aspergillus_niger_N/A        | SSKKKDSSHSSQ--NNAALGVHHGQQSSSPNQGTPTSSTTSVNDTRGKSPD | 69       |
| gi Aspergillus_nidulans_para    | SKKKEASQASQQNSANLGIHHGQQSASPNOVTPTSSTTSVNDIRGAPE    | 70       |
| gi Mus_musculus_alpha           | -----                                               |          |
| gi Rattus_norvegicus_alpha      | -----                                               |          |
| gi Macaca_mulatta_alpha         | -----                                               |          |
| gi Homo_sapiens_alpha           | -----                                               |          |
| gi Ovis_aries_alpha             | -----                                               |          |
| gi Bos_taurus_alpha             | -----                                               |          |
| gi Felis_catus_alpha            | -----                                               |          |
| gi Canis_lupus_familiaris_alph  | -----                                               |          |
| gi Falco_peregrinus_alpha       | -----                                               |          |
| gi Gallus_gallus_alpha          | -----                                               |          |
| gi Alligator_mississippiensis   | -----                                               |          |

Figure S1. Cont.

|                                       |                       |    |
|---------------------------------------|-----------------------|----|
| gi Chrysemys_picta_bellii_alpha       | -----                 |    |
| gi Xenopus_laevis_alpha               | -----                 |    |
| gi Xenopus_tropicalis_alpha           | -----                 |    |
| gi Ambystoma_mexicanum_alpha          | -----                 |    |
| gi Danio_rerio_alpha                  | -----                 |    |
| gi Petromyzon_marinus_S4RHV1          | -----                 |    |
| gi Mus_musculus_epsilon               | -----                 |    |
| gi Rattus_norvegicus_epsilon          | -----                 |    |
| gi Macaca_mulatta_epsilon             | -----                 |    |
| gi Homo_sapiens_epsilon               | -----                 |    |
| gi Ovis_aries_epsilon                 | -----                 |    |
| gi Bos_taurus_epsilon                 | -----                 |    |
| gi Canis_lupus_familiaris_epsilon     | -----                 |    |
| gi Falco_peregrinus_epsilon           | -----                 |    |
| gi Gallus_gallus_epsilon              | -----                 |    |
| gi Felis_catus_epsilon                | -----                 |    |
| gi Chrysemys_picta_bellii_epsilon     | -----                 |    |
| gi Xenopus_laevis_epsilon             | -----                 |    |
| gi Xenopus_tropicalis_epsilon         | -----                 |    |
| gi Alligator_mississippiensis_epsilon | -----                 |    |
| gi Ambystoma_mexicanum_epsilon        | -----                 |    |
| gi Danio_rerio_epsilon                | -----                 |    |
| gi Mus_musculus_beta                  | -----                 |    |
| gi Rattus_norvegicus_beta             | -----                 |    |
| gi Felis_catus_beta                   | -----                 |    |
| gi Canis_lupus_familiaris_beta        | -----                 |    |
| gi Homo_sapiens_beta                  | -----                 |    |
| gi Bos_taurus_beta                    | -----                 |    |
| gi Ovis_aries_beta                    | -----                 |    |
| gi Macaca_mulatta_beta                | -----                 |    |
| gi Xenopus_laevis_beta                | -----                 |    |
| gi Alligator_mississippiensis_beta    | -----                 |    |
| gi Chrysemys_picta_bellii_beta        | -----                 |    |
| gi Xenopus_tropicalis_beta            | -----                 |    |
| gi Danio_rerio_beta                   | -----                 |    |
| gi Ambystoma_mexicanum_beta           | -----                 |    |
| gi Petromyzon_marinus_S4RGA7          | -----                 |    |
| gi Strongylocentrotus_purpurat        | -----                 |    |
| gi Drosophila_melanogaster_wdb        | -----                 |    |
| jgi Branchiostoma_floridiae_237       | -----                 |    |
| gi Hydra_vulgaris_alpha               | -----                 |    |
| jgi Branchiostoma_floridiae_112       | -----                 |    |
| jgi Branchiostoma_floridiae_284       | -----                 |    |
| gi Caenorhabditis_elegans_FPTR        | -----                 |    |
| gi Amphimedon_queenslandica_be        | -----                 |    |
| gi Chrysemys_picta_bellii_gamma       | -----MLTCNKA          | 7  |
| gi Chrysemys_picta_bellii_delta       | -----                 |    |
| gi Falco_peregrinus_gamma             | -----MLTCNRA          | 7  |
| gi Falco_peregrinus_delta/gamma       | -----                 |    |
| gi Gallus_gallus_gamma                | -----MLTCNRA          | 7  |
| gi Alligator_mississippiensis_gamma   | -----MLTCNKA          | 7  |
| gi Alligator_mississippiensis_gamma   | -----                 |    |
| gi Ambystoma_mexicanum_gamma          | -----MLTCNQV          | 7  |
| gi Mus_musculus_gamma                 | -----MLTCNKA          | 7  |
| gi Rattus_norvegicus_gamma            | -----MLTCNKA          | 7  |
| gi Ovis_aries_gamma                   | -----MLTCNKA          | 7  |
| gi Bos_taurus_gamma                   | -----MLTCNKA          | 7  |
| gi Canis_lupus_familiaris_gamma       | -----MWTCNKA          | 7  |
| gi Macaca_mulatta_gamma               | -----MLTCNKA          | 7  |
| gi Homo_sapiens_gamma                 | -----                 |    |
| gi Felis_catus_gamma                  | -----MAESPKAGKSGKSSKE | 16 |

Figure S1. Cont.

|                                 |                                                      |     |
|---------------------------------|------------------------------------------------------|-----|
| gi Canis_lupus_familiaris_delt  | -----MAESPKAGKSGKSSKE                                | 16  |
| gi Macaca_mulatta_delta/gamma   | VGGTLREKLRRAGPTREGRACRMGGTSREDLRTVELESPKAGKSGKSSKE   | 250 |
| gi Bos_taurus_delta/gamma       | -----MPNKNKKEKESPKAGKSGKSSKE                         | 23  |
| gi Mus_musculus_delta/gamma     | -----MPNKNKKEKEPPKPVKSGKGPKKE                        | 23  |
| gi Rattus_norvegicus_delta/gam  | GRSGRRRMLRQCSAWRGLGCWSVQDSPQKPSLGGGLREPPKPVKSGKGSKKE | 92  |
| gi Danio_rerio_gamma            | -----MLTCSKDE-----ARMVLDAPS                          | 17  |
| gi Danio_rerio_delta/gamma      | -----MPNKTKKDKDSPKSAKVGTAGQ                          | 23  |
| gi Xenopus_laevis_delta/gamma   | -----MPNKNKKDKKEPPKAGKSGKSGKE                        | 23  |
| gi Xenopus_laevis_gamma         | -----MPNKNKKDKKEPPKAGKSGKSGKE                        | 23  |
| gi Xenopus_tropicalis_delta/ga  | -----MPNKNKKDKKEPPKAGKSGKTGKE                        | 23  |
| gi Mus_musculus_delta           | -----MSYKLLKKDKE-PSKLAGGTAKPS                        | 22  |
| gi Rattus_norvegicus_delta      | AERAECGRAEPEPERGRRSRAGCGPAEMPYKLLKKDKE-PPKLAGGTAKPS  | 49  |
| gi Felis_catus_delta            | -----GSGRAEMPYKLLKKEKE-TPKLAGGTAKPS                  | 28  |
| gi Bos_taurus_delta             | -----MPYKLLKKEKE-PPKLAGGTAKPS                        | 22  |
| gi Canis_lupus_familiaris_delt  | -----MPYKLLKKEKVSPPKLAGGTAKPS                        | 23  |
| gi Macaca_mulatta_delta         | -----MPYKLLKKEKE-PPKVAKCTAKPT                        | 22  |
| gi Homo_sapiens_delta           | -----MPYKLLKKEKE-PPKVAKCTAKPS                        | 22  |
| gi Ovis_aries_delta             | -----MAEDNAHQTPKFKE-PPKLAGGTAKPS                     | 26  |
| gi Falco_peregrinus_delta       | -----                                                |     |
| gi Gallus_gallus_delta          | -----MP---SVGEE-SPKSAKSTTKPG                         | 19  |
| gi Alligator_mississippiensis_  | -----MPYKLLKKEKE-PPKSAKSTTKSS                        | 22  |
| gi Chrysemys_picta_bellii_delt  | -----MPYKLLKKEKE-PPKSAKSTTKPS                        | 22  |
| gi Danio_rerio_delta            | -----MPNKTKEKE-PTKSAKSTTKNS                          | 22  |
| gi Ambystoma_mexicanum_delta    | -----                                                |     |
| gi Petromyzon_marinus_S4RN43    | -----MPNKNKKDKEPKAAKSAKNSPK                          | 23  |
| jgi Branchiostoma_floridae_237  | -----                                                |     |
| jgi Branchiostoma_floridae_252  | -----QANRNRAATNN--                                   | 11  |
| gi Strongylocentrotus_purpurat  | -----MSRKKPGEWISALIVSKHRPGNVPPPTQLTR                 | 31  |
| gi Caenorhabditis_elegans_PPTR  | -----MIPADAPPTNIGR                                   | 14  |
| gi Hydra_vulgaris_delta         | ---KLKKDKENSEKKDKGKEE-----ENKGKANLPPQVPVVKKAGP       | 42  |
| gi Amphimedon_queenslandica_de  | KGKKAEEKEKAQNKNNTSAKPSSQNPVATGDNNVPATPVTTGVGV        | 55  |
| gi Drosophila_melanogaster_B56  | AESKNETTATNNNSNTSGSISSSSSNNIVIPASATNGIKESNSNLSTTTT   | 98  |
| gi Dictyostelium_discoideum_ps  | -----MKNDHINYQQLNSQSPILNS                            | 20  |
| gi Dictyostelium_purpureum_N/A  | -----MKNDHIN-                                        | 7   |
| gi Dictyostelium_fasciculatum_  | -----MTSPHIK-----                                    | 7   |
| gi Polysphondylium_pallidum_N/  | -----MKSPKES-----                                    | 7   |
| gi Arabidopsis_thaliana_theta   | -----MWKQILSKLPKK-----                               | 12  |
| gi Arabidopsis_thaliana_eta     | -----MWKQILSKLPNK-----                               | 12  |
| gi Arabidopsis_thaliana_zeta    | -----MIKQIFGKLPR-----                                | 11  |
| gi Arabidopsis_thaliana_gamma   | -----MIKQIFGKLPR-----                                | 11  |
| gi>Oryza                        | -----MMKQIFGR--R-----                                | 9   |
| gi>Oryza_sativa_zeta            | -----MIKQILGRFPK-----                                | 11  |
| gi>Oryza_sativa_theta           | -----MIKQILGRLPKK-----                               | 12  |
| gi>Oryza_sativa_eta             | -----MIKQILGRLPK-----                                | 11  |
| gi Arabidopsis_thaliana_delta   | -----MFKQILGKLPK-----                                | 11  |
| gi Arabidopsis_thaliana_N/A     | -----MFKQFLSKLPK-----                                | 11  |
| gi>Oryza_sativa_kappa           | -----MWKGFLSKLPK-----                                | 11  |
| gi>Oryza_sativa_N/A             | -----MWKQFLGKISW-----                                | 11  |
| gi Arabidopsis_thaliana_alpha   | -----MFKKIMKGANR-----                                | 11  |
| gi Arabidopsis_thaliana_beta    | -----MFKKIMKGHR-----                                 | 11  |
| gi>Oryza_sativa_N/A_2           | -----MFNKI IKRGGR-----                               | 11  |
| gi Arabidopsis_thaliana_epsilon | -----MFNKI IKLGQK-----                               | 11  |
| gi Chlamydomonas_reinhardtii_w  | -----MLKSMKQKFSG-----                                | 11  |
| gi Schizosaccharomyces_pombe_P  | -----KSNSHDSSKAPKESPS-----                           | 43  |
| gi Schizosaccharomyces_pombe_P  | DVKHTDTHHSSKHELKLLKSHFLKDTLKHKRNNHHANSNNEKHENSDDKIH  | 91  |
| gi Ashbya_gossypii_RTS1         | Q-----PKAKDAGK-----SGAGAAPKVVAACK-----               | 86  |
| gi Saccharomyces_cerevisiae_RT  | QGKHSSSTSKTKTATTPSSSSSSSSSVSRSGSSSTKTKTSSRKQGEQS     | 129 |
|                                 |                                                      |     |
| gi Aspergillus_niger_N/A        | NGSQAG-----MYPGTPTKQGQQMAPSV                         | 92  |
| gi Aspergillus_nidulans_para    | DASQAGG-----FPPATPTKQGQPMAPSV                        | 94  |

Figure S1. Cont.

|                                   |        |            |
|-----------------------------------|--------|------------|
| gi Mus_musculus_alpha             | -----  |            |
| gi Rattus_norvegicus_alpha        | -----  |            |
| gi Macaca_mulatta_alpha           | -----  |            |
| gi Homo_sapiens_alpha             | -----  |            |
| gi Ovis_aries_alpha               | -----  |            |
| gi Bos_taurus_alpha               | -----  |            |
| gi Felis_catus_alpha              | -----  |            |
| gi Canis_lupus_familiaris_alph    | -----  |            |
| gi Falco_peregrinus_alpha         | -----  |            |
| gi Gallus_gallus_alpha            | -----  |            |
| gi Alligator_mississippiensis_    | -----  |            |
| gi Chrysemys_picta_bellii_alph    | -----  |            |
| gi Xenopus_laevis_alpha           | -----  |            |
| gi Xenopus_tropicalis_alpha       | -----  |            |
| gi Ambystoma_mexicanum_alpha      | -----  |            |
| gi Danio_rerio_alpha              | -----  |            |
| gi Petromyzon_marinus_S4RHV1      | -----  |            |
| gi Mus_musculus_epsilon           | -----  |            |
| gi Rattus_norvegicus_epsilon      | -----  |            |
| gi Macaca_mulatta_epsilon         | -----  |            |
| gi Homo_sapiens_epsilon           | -----  |            |
| gi Ovis_arie_epsilon              | -----  |            |
| gi Bos_taurus_epsilon             | -----  |            |
| gi Canis_lupus_familiaris_epsilon | -----  |            |
| gi Falco_peregrinus_epsilon       | -----  |            |
| gi Gallus_gallus_epsilon          | -----  |            |
| gi Felis_catus_epsilon            | -----  |            |
| gi Chrysemys_picta_bellii_epsilon | -----  |            |
| gi Xenopus_laevis_epsilon         | -----  |            |
| gi Xenopus_tropicalis_epsilon     | -----  |            |
| gi Alligator_mississippiensis_    | -----  | MESAGE 6   |
| gi Ambystoma_mexicanum_epsilon    | -----  |            |
| gi Danio_rerio_epsilon            | -----  |            |
| gi Mus_musculus_beta              | -----  |            |
| gi Rattus_norvegicus_beta         | -----  |            |
| gi Felis_catus_beta               | -----  |            |
| gi Canis_lupus_familiaris_beta    | -----  |            |
| gi Homo_sapiens_beta              | -----  |            |
| gi Bos_taurus_beta                | -----  |            |
| gi Ovis_aries_beta                | -----  |            |
| gi Macaca_mulatta_beta            | -----  |            |
| gi Xenopus_laevis_beta            | -----  |            |
| gi Alligator_mississippiensis_    | -----  |            |
| gi Chrysemys_picta_bellii_beta    | -----  |            |
| gi Xenopus_tropicalis_beta        | -----  |            |
| gi Danio_rerio_beta               | -----  |            |
| gi Ambystoma_mexicanum_beta       | -----  |            |
| gi Petromyzon_marinus_S4RGA7      | -----  |            |
| gi Strongylocentrotus_purpurat    | -----  |            |
| gi Drosophila_melanogaster_wdb    | -----  |            |
| jgi Branchiostoma_floridae_237    | -----  |            |
| gi Hydra_vulgaris_alpha           | -----  |            |
| jgi Branchiostoma_floridae_112    | -----  |            |
| jgi Branchiostoma_floridae_284    | -----  |            |
| gi Caenorhabditis_elegans_PPTR    | -----  | MHGSGLSL 8 |
| gi Amphimedon_queenslandica_be    | -----  |            |
| gi Chrysemys_picta_bellii_gamm    | G----- | 8          |
| gi Chrysemys_picta_bellii_delt    | -----  |            |
| gi Falco_peregrinus_gamma         | G----- | 8          |
| gi Falco_peregrinus_delta/gamm    | -----  |            |
| gi Gallus_gallus_gamma            | G----- | 8          |

Figure S1. Cont.

|                                 |                               |     |
|---------------------------------|-------------------------------|-----|
| gi Alligator_mississippiensis_  | G-----                        | 8   |
| gi Alligator_mississippiensis_  | -----                         |     |
| gi Ambystoma_mexicanum_gamma    | G-----                        | 8   |
| gi Mus_musculus_gamma           | G-----                        | 8   |
| gi Rattus_norvegicus_gamma      | G-----                        | 8   |
| gi Ovis_aries_gamma             | G-----                        | 8   |
| gi Bos_taurus_gamma             | G-----                        | 8   |
| gi Canis_lupus_familiaris_gamm  | G-----                        | 8   |
| gi Macaca_mulatta_gamma         | G-----                        | 8   |
| gi Homo_sapiens_gamma           | -----                         |     |
| gi Felis_catus_gamma            | GQDII-----                    | 21  |
| gi Canis_lupus_familiaris_delt  | GQDII-----                    | 21  |
| gi Macaca_mulatta_delta/gamma   | GQDTV-----                    | 255 |
| gi Bos_taurus_delta/gamma       | GQDII-----                    | 28  |
| gi Mus_musculus_delta/gamma     | GQDTA-----                    | 28  |
| gi Rattus_norvegicus_delta/gam  | GQDTA-----                    | 97  |
| gi Danio_rerio_gamma            | AN-----                       | 19  |
| gi Danio_rerio_delta/gamma      | ENSEH-----                    | 28  |
| gi Xenopus_laevis_delta/gamma   | GQDNP-----                    | 28  |
| gi Xenopus_laevis_gamma         | GQDNP-----                    | 28  |
| gi Xenopus_tropicalis_delta/ga  | GQDNP-----                    | 28  |
| gi Mus_musculus_delta           | SSSK-----DGGGENTD-EAQFPQ      | 41  |
| gi Rattus_norvegicus_delta      | SSSK-----DGGGENTDTEAQFPQ      | 69  |
| gi Felis_catus_delta            | SSGK-----DGGGESAE-EAQFPQ      | 47  |
| gi Bos_taurus_delta             | SSSK-----DGGGESTE-EAQFPQ      | 41  |
| gi Canis_lupus_familiaris_delt  | SSGK-----DGGGESTD-EPQFPQ      | 42  |
| gi Macaca_mulatta_delta         | SSGK-----DGGGENTE-EAQFPQ      | 41  |
| gi Homo_sapiens_delta           | SSGK-----DGGGENTE-EAQFPQ      | 41  |
| gi Ovis_aries_delta             | SSSK-----DGGGESTE-EPQPPP      | 45  |
| gi Falco_peregrinus_delta       | -----                         |     |
| gi Gallus_gallus_delta          | GGSG-----KDGAENSEEAQPPQQ      | 40  |
| gi Alligator_mississippiensis_  | GGSX--G-----KDGAENSEEVQQ----  | 40  |
| gi Chrysemys_picta_bellii_delt  | SGSSGGG-----KDGAENSEEVQQ----  | 42  |
| gi Danio_rerio_delta            | NASAG-----KDVGTENSEEAQQ----   | 40  |
| gi Ambystoma_mexicanum_delta    | -----                         |     |
| gi Petromyzon_marinus_S4RN43    | DAADT-----                    | 28  |
| jgi Branchiostoma_floridiae_237 | -----                         |     |
| jgi Branchiostoma_floridiae_252 | -----                         |     |
| gi Strongylocentrotus_purpurat  | T-----                        | 32  |
| gi Caenorhabditis_elegans_PPTR  | TNT-----                      | 17  |
| gi Hydra_vulgaris_delta         | -----                         |     |
| gi Amphimedon_queenslandica_de  | GLPAK-----                    | 60  |
| gi Drosophila_melanogaster_B56  | AAAVAAA-----TTVEGVAPAITSTIVVT | 122 |
| gi Dictyostelium_discoideum_ps  | NKNQTQQ-----NQQQQQQQQQNPQQQQ  | 44  |
| gi Dictyostelium_purpureum_N/A  | -----AQQVSPNLKHQQ             | 19  |
| gi Dictyostelium_fasciculatum   | -----PKQGSDDPISPS             | 19  |
| gi Polysphondylium_pallidum_N/  | -----ASGVAGSPTSPS             | 19  |
| gi Arabidopsis_thaliana_theta   | -----SSSK-----                | 16  |
| gi Arabidopsis_thaliana_eta     | -----KSSKHEHRGR               | 22  |
| gi Arabidopsis_thaliana_zeta    | -----KPSKSLQND                | 20  |
| gi Arabidopsis_thaliana_gamma   | -----KPSKSSHND                | 20  |
| gi Oryza                        | -----KNAKSADKD                | 18  |
| gi Oryza_sativa_zeta            | -----KPSKSGDKD                | 20  |
| gi Oryza_sativa_theta           | -----EKPGKSGE-K               | 21  |
| gi Oryza_sativa_eta             | -----KPGKAGDSR                | 20  |
| gi Arabidopsis_thaliana_delta   | -----                         |     |
| gi Arabidopsis_thaliana_N/A     | -----KSSKSDSG-                | 19  |
| gi Oryza_sativa_kappa           | -----KTSASGRGA                | 20  |
| gi Oryza_sativa_N/A             | -----KAPKSGGG-                | 19  |
| gi Arabidopsis_thaliana_alpha   | -----KASKAEAND                | 20  |
| gi Arabidopsis_thaliana_beta    | -----KPSKSEANE                | 20  |

Figure S1. Cont.

|    |                              |                                                    |     |
|----|------------------------------|----------------------------------------------------|-----|
| gi | Oryza_sativa_N/A_2           | -----KGQRAADGG                                     | 20  |
| gi | Arabidopsis_thaliana_epsilon | -----KFNKSDQHH                                     | 20  |
| gi | Chlamydomonas_reinhardtii_w  | -----KKDASKNKD                                     | 20  |
| gi | Schizosaccharomyces_pombe_P  | -----TDP-NGSVIG----                                | 52  |
| gi | Schizosaccharomyces_pombe_P  | TTVLASGHEDSDYSTFLPVIETSKVKDANHFPPNYPEPKNDSVSSNIDEF | 141 |
| gi | Ashbya_gossypii_RTS1         | -----EERSYPTMIAA                                   | 97  |
| gi | Saccharomyces_cerevisiae_RT  | KQSQQPSQSQKQGSSSSSAAIMNPTPVLTVTKDDKSTSGEDHAHPTLLGA | 179 |
|    |                              |                                                    |     |
| gi | Aspergillus_niger_N/A        | VISPSA-----PHVPPPGAAETMPGD                         | 113 |
| gi | Aspergillus_nidulans_para    | VISPSG-----PHAPPPGAAETMPGD                         | 115 |
| gi | Mus_musculus_alpha           | -----MSSPSPP---AP                                  | 9   |
| gi | Rattus_norvegicus_alpha      | -----MSSPSPP---AP                                  | 9   |
| gi | Macaca_mulatta_alpha         | -----MSSSSPP---AG                                  | 9   |
| gi | Homo_sapiens_alpha           | -----MSSSSPP---AG                                  | 9   |
| gi | Ovis_aries_alpha             | -----MSSSSPPPPAG                                   | 12  |
| gi | Bos_taurus_alpha             | -----MSSSSPPPPAG                                   | 12  |
| gi | Felis_catus_alpha            | -----                                              |     |
| gi | Canis_lupus_familiaris_alph  | -----                                              |     |
| gi | Falco_peregrinus_alpha       | -----                                              |     |
| gi | Gallus_gallus_alpha          | -----                                              |     |
| gi | Alligator_mississippiensis   | -----AAAAPLAAM                                     | 9   |
| gi | Chrysemys_picta_bellii_alph  | -----                                              |     |
| gi | Xenopus_laevis_alpha         | -----                                              |     |
| gi | Xenopus_tropicalis_alpha     | -----                                              |     |
| gi | Ambystoma_mexicanum_alpha    | -----                                              |     |
| gi | Danio_rerio_alpha            | -----                                              |     |
| gi | Petromyzon_marinus_S4RHV1    | -----                                              |     |
| gi | Mus_musculus_epsilon         | -----MS                                            | 2   |
| gi | Rattus_norvegicus_epsilon    | -----MS                                            | 2   |
| gi | Macaca_mulatta_epsilon       | -----MS                                            | 2   |
| gi | Homo_sapiens_epsilon         | -----MS                                            | 2   |
| gi | Ovis_aries_epsilon           | -----MS                                            | 2   |
| gi | Bos_taurus_epsilon           | -----MS                                            | 2   |
| gi | Canis_lupus_familiaris_epsi  | -----MS                                            | 2   |
| gi | Falco_peregrinus_epsilon     | -----MS                                            | 2   |
| gi | Gallus_gallus_epsilon        | -----MS                                            | 2   |
| gi | Felis_catus_epsilon          | -----MS                                            | 2   |
| gi | Chrysemys_picta_bellii_epsi  | -----MS                                            | 2   |
| gi | Xenopus_laevis_epsilon       | -----MS                                            | 2   |
| gi | Xenopus_tropicalis_epsilon   | -----MS                                            | 2   |
| gi | Alligator_mississippiensis   | YWNVKL-----EIRKEIHSVKAGDMS                         | 27  |
| gi | Ambystoma_mexicanum_epsilon  | -----                                              |     |
| gi | Danio_rerio_epsilon          | -----MS                                            | 2   |
| gi | Mus_musculus_beta            | ----M-----ETKLPPASTPTSPSS                          | 16  |
| gi | Rattus_norvegicus_beta       | ----M-----ETKLPPASTPTSPSS                          | 16  |
| gi | Felis_catus_beta             | ----M-----ETKLPPASTPTSPSS                          | 16  |
| gi | Canis_lupus_familiaris_beta  | ----M-----ETKLPPASTPTSPSS                          | 16  |
| gi | Homo_sapiens_beta            | ----M-----ETKLPPASTPTSPSS                          | 16  |
| gi | Bos_taurus_beta              | ----M-----ETKLPPASTPTSPSS                          | 16  |
| gi | Ovis_aries_beta              | ----M-----ETKLPPASTPTSPSS                          | 16  |
| gi | Macaca_mulatta_beta          | ----M-----AQEHGGWGQQLPWR                           | 16  |
| gi | Xenopus_laevis_beta          | -----                                              |     |
| gi | Alligator_mississippiensis   | ----M-----EMKLTPAGTPPSPPS                          | 16  |
| gi | Chrysemys_picta_bellii_beta  | ----M-----ETKLPPAGTPSPSS                           | 16  |
| gi | Xenopus_tropicalis_beta      | ----M-----ETKLP--VTPTSPSS                          | 14  |
| gi | Danio_rerio_beta             | ----M-----ETPTKLPPSSSPSSPT                         | 16  |
| gi | Ambystoma_mexicanum_beta     | -----                                              |     |
| gi | Petromyzon_marinus_S4RGA7    | -----                                              |     |
| gi | Strongylocentrotus_purpurat  | -----                                              |     |
| gi | Drosophila_melanogaster_wdb  | -----                                              |     |

Figure S1. Cont.

|                                 |                            |     |
|---------------------------------|----------------------------|-----|
| jgi Branchiostoma_floridiae_237 | -----                      |     |
| gi Hydra_vulgaris_alpha         | -----MPHG                  | 4   |
| jgi Branchiostoma_floridiae_112 | -----                      |     |
| jgi Branchiostoma_floridiae_284 | -----                      |     |
| gi Caenorhabditis_elegans_PPTR  | TGAPHQ-----IPPPRTQGAATGGQQ | 29  |
| gi Amphimedon_queenslandica_be  | --MTSK-----ASKGLGKTPPKAGTP | 19  |
| gi Chrysemys_picta_bellii_gamm  | -----                      |     |
| gi Chrysemys_picta_bellii_delt  | -----                      |     |
| gi Falco_peregrinus_gamma       | -----                      |     |
| gi Falco_peregrinus_delta/gamm  | -----                      |     |
| gi Gallus_gallus_gamma          | -----                      |     |
| gi Alligator_mississippiensis_  | -----                      |     |
| gi Alligator_mississippiensis_  | -----                      |     |
| gi Ambystoma_mexicanum_gamma    | -----                      |     |
| gi Mus_musculus_gamma           | -----                      |     |
| gi Rattus_norvegicus_gamma      | -----                      |     |
| gi Ovis_aries_gamma             | -----                      |     |
| gi Bos_taurus_gamma             | -----                      |     |
| gi Canis_lupus_familiaris_gamm  | -----                      |     |
| gi Macaca_mulatta_gamma         | -----                      |     |
| gi Homo_sapiens_gamma           | -----                      |     |
| gi Felis_catus_gamma            | -----ES-EIPGRKNN           | 31  |
| gi Canis_lupus_familiaris_delt  | -----ES-ETSSRKNN           | 31  |
| gi Macaca_mulatta_delta/gamma   | -----ESEQISVRKNS           | 266 |
| gi Bos_taurus_delta/gamma       | -----DS-EIPSRKNS           | 38  |
| gi Mus_musculus_delta/gamma     | -----ET-EIASRKNS           | 38  |
| gi Rattus_norvegicus_delta/gam  | -----EA-EIASRKNS           | 107 |
| gi Danio_rerio_gamma            | -----                      |     |
| gi Danio_rerio_delta/gamma      | -----EQASNKKGGNS           | 39  |
| gi Xenopus_laevis_delta/gamma   | -----EHEVSNKKSNS           | 39  |
| gi Xenopus_laevis_gamma         | -----EHEVSNKKSNS           | 39  |
| gi Xenopus_tropicalis_delta/ga  | -----EHEVSNKKSNS           | 39  |
| gi Mus_musculus_delta           | SQ-----SPSSNKRPSNS         | 54  |
| gi Rattus_norvegicus_delta      | PQ-----PPSSNKRPSNS         | 82  |
| gi Felis_catus_delta            | PQPQPQ-----PQPQPSSNKRPSNS  | 68  |
| gi Bos_taurus_delta             | PQPQPQ-----PQ--PPSSNKRPSNS | 60  |
| gi Canis_lupus_familiaris_delt  | PQ-----PPSSNKRPSNS         | 55  |
| gi Macaca_mulatta_delta         | PQPQPQ-----AQSQPPSSNKRPSNS | 62  |
| gi Homo_sapiens_delta           | PQPQPQ-----AQSQPPSSNKRPSNS | 62  |
| gi Ovis_aries_delta             | PQ-----PPSSNKRPSNS         | 58  |
| gi Falco_peregrinus_delta       | -----                      |     |
| gi Gallus_gallus_delta          | PQQQQQ-----QTPSNKRPSNS     | 57  |
| gi Alligator_mississippiensis_  | -QQQQQ-----QTTSNKRPSNS     | 56  |
| gi Chrysemys_picta_bellii_delt  | -QQQPP-----PPTSNNKRPSNS    | 58  |
| gi Danio_rerio_delta            | -----TASKRPSNS             | 49  |
| gi Ambystoma_mexicanum_delta    | -----                      |     |
| gi Petromyzon_marinus_S4RN43    | -----DESVSERGGNK           | 39  |
| jgi Branchiostoma_floridiae_237 | -----                      |     |
| jgi Branchiostoma_floridiae_252 | -----                      |     |
| gi Strongylocentrotus_purpurat  | -----                      |     |
| gi Caenorhabditis_elegans_PPTR  | -----                      |     |
| gi Hydra_vulgaris_delta         | -----                      |     |
| gi Amphimedon_queenslandica_de  | -----DIDGINSDDT            | 69  |
| gi Drosophila_melanogaster_B56  | GGTPPL-----SSLANKLKDNTPPYD | 143 |
| gi Dictyostelium_discoideum_ps  | QFQHQQ-----VPQLSPQQIPFSEPL | 65  |
| gi Dictyostelium_purpureum_N/A  | TNTNQT-----VP-LSPQQIPFSEPL | 39  |
| gi Dictyostelium_fasciculatum_  | SPNMYL-----GNGVQQQQQAPATSP | 40  |
| gi Polysphondylium_pallidum_N/  | -----GKGIS-----            | 24  |
| gi Arabidopsis_thaliana_theta   | ---NHS-----SSSS-----STSKSS | 29  |
| gi Arabidopsis_thaliana_eta     | EHGGHS-----SSSHTSGASTSKST  | 43  |
| gi Arabidopsis_thaliana_zeta    | SN--GE-----GGVNN-SYYASNSST | 38  |

Figure S1. Cont.

|    |                                |                                                    |     |
|----|--------------------------------|----------------------------------------------------|-----|
| gi | Arabidopsis_thaliana_gamma     | SNPNGE-----GGVN--SYIIPNSGI                         | 39  |
| gi | Oryza                          | FFSGTS-----PSVLD-QVSGLGVD                          | 38  |
| gi | Oryza_sativa_zeta              | PIGRSS-----PSVPN-PPLGPRGAE                         | 40  |
| gi | Oryza_sativa_theta             | DLAGVG-----SSLPDARTTTDLTMS                         | 42  |
| gi | Oryza_sativa_eta               | DAAGPN-----GNEP----SNSYSVA                         | 37  |
| gi | Arabidopsis_thaliana_delta     | -----KTSAKFW                                       | 18  |
| gi | Arabidopsis_thaliana_N/A       | ELN--R-----SSSGP-VSSPVQRS                          | 37  |
| gi | Oryza_sativa_kappa             | DLDSGQ-----CSNGAGNGNPIQRTS                         | 41  |
| gi | Oryza_sativa_N/A               | -----GGGSPTAKSPLSKGA                               | 34  |
| gi | Arabidopsis_thaliana_alpha     | SSMYG-----FDPP-GRSGPGS                             | 36  |
| gi | Arabidopsis_thaliana_beta      | PSSYG-----IGLPDNRSGPGS                             | 37  |
| gi | Oryza_sativa_N/A_2             | DAAHGR-----PAAAPSSSSGGAQP                          | 41  |
| gi | Arabidopsis_thaliana_epsilon   | QDNNNN-----NNNTSTNTVVRGS                           | 39  |
| gi | Chlamydomonas_reinhardtii_w    | D-----SQPSTSA                                      | 28  |
| gi | Schizosaccharomyces_pombe_P    | -----A-----QNDFLTVPKHSGKKV                         | 68  |
| gi | Schizosaccharomyces_pombe_P    | PNDNIS-----SASFSLVPQSTPPYL                         | 162 |
| gi | Ashbya_gossypii_RTS1           | AVSPGS-----TSG-----PPSPKEAEASPNGID                 | 122 |
| gi | Saccharomyces_cerevisiae_RT    | VSAVPSSPISNASGTAVSSDVENGNSNNNNMNINTSNTQDANHASSQSID | 229 |
|    |                                |                                                    |     |
| gi | Aspergillus_niger_N/A          | LAPPRKSHVFDRLQTPKDMSEGIRTPKRQHSSRFDISDQRQ-----     | 155 |
| gi | Aspergillus_nidulans_para      | LAPPRKSHVFDRLQTPKDMSEGIRTPKRQHSSRFDISDQRQ-----     | 157 |
| gi | Mus_musculus_alpha             | VACAAISASEKVDGFTRKSVRKAQRQKRSQGSSQFRSQGSQ-----     | 50  |
| gi | Rattus_norvegicus_alpha        | VACAAISASEKVDGFTRKSVRKAQRQKRSQGSSQFRSQGSQ-----     | 50  |
| gi | Macaca_mulatta_alpha           | AASAAISASEKVDGFTRKSVRKAQRQKRSQGSSQFRSQGSQ-----     | 50  |
| gi | Homo_sapiens_alpha             | AASAAISASEKVDGFTRKSVRKAQRQKRSQGSSQFRSQGSQ-----     | 50  |
| gi | Ovis_aries_alpha               | AASAAISAAEKVDGFTRKSVRKAQRQKRSQGSSQFRSQCSQ-----     | 53  |
| gi | Bos_taurus_alpha               | AASAAISAAEKVDGFTRKSVRKAQRQKRSQGSSQFRSQCSQ-----     | 53  |
| gi | Felis_catus_alpha              | -----                                              |     |
| gi | Canis_lupus_familiaris_alph    | -----                                              |     |
| gi | Falco_peregrinus_alpha         | -MSAAISAAEKVDGFTRKSVRKAQRQKRSQGSSQFRSQSSQ-----     | 40  |
| gi | Gallus_gallus_alpha            | -MSAAISAAEKVDGFTRKSVRKAQRQKRSQGSSQFRSQSSQ-----     | 40  |
| gi | Alligator_mississippiensis     | SAAAAISAAEKVDGFTRKSVRKAQRQKRSQGSSQFRSQSSQ-----     | 50  |
| gi | Chrysemys_picta_bellii_alph    | -MSAAISASEKVDGFTRKSVRKAQRQKRSQGSSQFRSQSSQ-----     | 40  |
| gi | Xenopus_laevis_alpha           | --MSAISAAEKVDGFTRKSVRKAQRQRRSQSSQFLGQGP-----       | 39  |
| gi | Xenopus_tropicalis_alpha       | --MSAISAAEKVDGFTRKSVRKAQRRRGRSQSSQFRGQGP-----      | 39  |
| gi | Ambystoma_mexicanum_alpha      | -----                                              |     |
| gi | Danio_rerio_alpha              | --MSAISASEKVDGFTRKSVRKAQRQVCQGSSQFVNSSRP-----      | 40  |
| gi | Petromyzon_marinus_S4RHV1      | MMSATATAAEKVDGFSRRSLRRAGRARRSQSSQFRTRAHL-----      | 41  |
| gi | Mus_musculus_epsilon           | SAPTTTPPSVDKVDGFSRKSVRKA-RQKRSQSSSQFRSQGKP-----    | 42  |
| gi | Rattus_norvegicus_epsilon      | SAPTTTPPSVDKVDGFSRKSVRKA-RQKRSQSSSQFRSQGKP-----    | 42  |
| gi | Macaca_mulatta_epsilon         | SAPTTTPPSVDKVDGFSRKSVRKA-RQKRSQSSSQFRSQGKP-----    | 42  |
| gi | Homo_sapiens_epsilon           | SAPTTTPPSVDKVDGFSRKSVRKA-RQKRSQSSSQFRSQGKP-----    | 42  |
| gi | Ovis_aries_epsilon             | SAPTTTPPSVDKVDGFSRKSVRKA-RQKRSQSSSQFRSQGKP-----    | 42  |
| gi | Bos_taurus_epsilon             | SAPTTTPPSVDKVDGFSRKSVRKA-RQKRSQSSSQFRSQGKP-----    | 42  |
| gi | Canis_lupus_familiaris_epsilon | SAPTTTPPSVDKVDGFSRKSVRKA-RQKRSQSSSQFRSQGKP-----    | 42  |
| gi | Falco_peregrinus_epsilon       | SAPTTTPPSVDKVDGFSRKSVRKA-RQKRSQSSSQFRSQGKP-----    | 42  |
| gi | Gallus_gallus_epsilon          | SAPTTTPPSVDKVDGFSRKSVRKA-RQKRSQSSSQFRSQGKP-----    | 42  |
| gi | Felis_catus_epsilon            | SAPTTTPPSVDKVDGFSRKSVRKA-RQKRSQSSSQFRSQGKP-----    | 42  |
| gi | Chrysemys_picta_bellii_epsilon | SAPTTTPPSVDKVDGFSRKSVRKA-RQKRSQSSSQFRSQGKP-----    | 42  |
| gi | Xenopus_laevis_epsilon         | SAPTTTPPSVDKVDGFSRKSVRKA-RQKRSQSSSQFRSQGKP-----    | 42  |
| gi | Xenopus_tropicalis_epsilon     | SAPTTTPPSVDKVDGFSRKSVRKA-RQKRSQSSSQFRSQGKP-----    | 42  |
| gi | Alligator_mississippiensis     | SAPTTTPPSVDKVDGFSRKSVRKA-RQKRSQSSSQFRSQGKP-----    | 67  |
| gi | Ambystoma_mexicanum_epsilon    | --QTTTPPSVDKVDGFSRKSVRKA-RQKRSQSSSQFRSQGKP-----    | 38  |
| gi | Danio_rerio_epsilon            | SAATTAPSVDKVDGFSRKSVRKA-RQKRAQSSSQFRSQDKP-----     | 42  |
| gi | Mus_musculus_beta              | PGLSPVPPPDKVDGFSRRSLRRA-RPRRSHSSSQFRYQSNQ-----     | 56  |
| gi | Rattus_norvegicus_beta         | PGLSPVPPPDKVDGFSRRSLRRA-RPRRSHSSSQFRYQSNQ-----     | 56  |
| gi | Felis_catus_beta               | PGLSPVPPPDKVDGFSRRSLRRA-RPRRSHSSSQFRYQSNQ-----     | 56  |
| gi | Canis_lupus_familiaris_beta    | PGLSPVPPPDKVDGFSRRSLRRA-RPRRSHSSSQFRYQSNQ-----     | 56  |
| gi | Homo_sapiens_beta              | PGLSPVPPPDKVDGFSRRSLRRA-RPRRSHSSSQFRYQSNQ-----     | 56  |
| gi | Bos_taurus_beta                | PGLSPVPPPDKVDGFSRRSLRRA-RPRRSHSSSQFRYQSNQ-----     | 56  |

Figure S1. Cont.



|                                 |                                                 |     |
|---------------------------------|-------------------------------------------------|-----|
| gi Ovis_aries_beta              | PGLSPVPPDPKVDGFSRRSLRRA-RPRDXEGSPLPRAAAAG-----  | 56  |
| gi Macaca_mulatta_beta          | LGGS-VPPRAGAAG-----GAG-----                     | 32  |
| gi Xenopus_laevis_beta          | -----                                           |     |
| gi Alligator_mississippiensis   | PGLSPVPPEKVDGFSRRSLRRT-RPRRSHSSSQFRYQSSQ-----   | 56  |
| gi Chrysemys_picta_bellii_beta  | PGMSPVPPDPKVDGFSRRSLRRS-RQRRSHSSSQFRYQSNQ-----  | 56  |
| gi Xenopus_tropicalis_beta      | PGLSPVLAADKVDGFSRRSLRRS-RQRRSHSSSQFRYQSKQ-----  | 54  |
| gi Danio_rerio_beta             | TGFS-VPSAEKVDGFPRRSMRRA-RQRRSHSSSQFRYQSSQ-----  | 55  |
| gi Ambystoma_mexicanum_beta     | -----                                           |     |
| gi Petromyzon_marinus_S4RGA7    | -----                                           |     |
| gi Strongylocentrotus_purpurat  | -MSSGSTAVDKIDPFAKK-SLRKG--KQKKSQGSSQYRLS-----   | 36  |
| gi Drosophila_melanogaster_wdb  | -MSSG-TFVDRIDPFAKR-SLKK---KGKKSQGSSRYRNS-----   | 34  |
| jgi Branchiostoma_floridiae_237 | -----                                           |     |
| gi Hydra_vulgaris_alpha         | ASAAQPSTKENVDPFTRKSSVKKIVKSQKKQGSSRFKTT-----    | 44  |
| jgi Branchiostoma_floridiae_112 | MSAATGFPVTDKIDPFSKKQSVKKP--KQKRSQASSRYKAK-----  | 38  |
| jgi Branchiostoma_floridiae_284 | -----MITP--KP-----                              | 6   |
| gi Caenorhabditis_elegans_PPTR  | LSATANQFVDKIDPFHNKRGTSSR--LRINN--SSRYNVD-----   | 65  |
| gi Amphimedon_queenslandica_be  | PLGVQSSSLPVPDPFRKMSHINRK---NQQTQSSSRYNLKK-----  | 57  |
| gi Chrysemys_picta_bellii_gamm  | -----SRMVVDAAN-SNGP-----                        | 21  |
| gi Chrysemys_picta_bellii_delt  | -----                                           |     |
| gi Falco_peregrinus_gamma       | -----SRMVVDAAN-SNGP-----                        | 21  |
| gi Falco_peregrinus_delta/gamm  | -----                                           |     |
| gi Gallus_gallus_gamma          | -----SRMVVDAAN-SNGP-----                        | 21  |
| gi Alligator_mississippiensis   | -----SRMVVDAAN-SNGP-----                        | 21  |
| gi Alligator_mississippiensis   | -----                                           |     |
| gi Ambystoma_mexicanum_gamma    | -----SRMVVDAAGGSNGP-----                        | 22  |
| gi Mus_musculus_gamma           | -----SGMVVDAAS-SNGP-----                        | 21  |
| gi Rattus_norvegicus_gamma      | -----SGMVVDAAS-SNGP-----                        | 21  |
| gi Ovis_aries_gamma             | -----SRMVVDAAN-SNGP-----                        | 21  |
| gi Bos_taurus_gamma             | -----SRMVVDAAS-SNGP-----                        | 21  |
| gi Canis_lupus_familiaris_gamm  | -----SRMVVDAAN-SNGP-----                        | 21  |
| gi Macaca_mulatta_gamma         | -----SRMVVDAAN-SNGP-----                        | 21  |
| gi Homo_sapiens_gamma           | -----MVVDAAN-SNGP-----                          | 11  |
| gi Felis_catus_gamma            | LPATPSTVSSKIKVPAAQPIVR---RDKRQNSSRFS-ASNN-----  | 68  |
| gi Canis_lupus_familiaris_delt  | LAAPPSTVSSKIKVPVPQPIVK---KEKRQNSSRFN-ASNN-----  | 68  |
| gi Macaca_mulatta_delta/gamma   | LVAVPSTVSAKIKVPVSQPIVK---KDKRQNSSRFS-ASNN-----  | 303 |
| gi Bos_taurus_delta/gamma       | LIAAPSAASSKIKVPAPQPIVK---RDRRQNSSRFS-ASNN-----  | 75  |
| gi Mus_musculus_delta/gamma     | LTVVQSSSTSTKIKVPIQPVVVPVKDKRQNSSRFN-ASNN-----   | 78  |
| gi Rattus_norvegicus_delta/gam  | LASVQSSSTS-KIKVPVPQVPVK---KDKRQNSSRFN-ASNN----- | 144 |
| gi Danio_rerio_gamma            | -----GPFQPA-----                                | 26  |
| gi Danio_rerio_delta/gamma      | VPPATQLLKKGKQSGSQTPVKKE----KRPNSRFS-LSNN-----   | 74  |
| gi Xenopus_laevis_delta/gamma   | TPPPAQVSKIKVPTPQAVVKKE----KRQSSSRFN-VSNN-----   | 74  |
| gi Xenopus_laevis_gamma         | TPPPAQVSKIKVPTPQAVVKKE----KRQSSSRFN-VSNN-----   | 74  |
| gi Xenopus_tropicalis_delta/ga  | TPPPAQVSKIKVPTPQAVVKKE----KRQSSSRFN-VSNN-----   | 74  |
| gi Mus_musculus_delta           | TPPPTQLSKIKYSGGPQIVKKE----RRQSSFFFN-LNKN-----   | 89  |
| gi Rattus_norvegicus_delta      | TPPPTQLSKIKYSGGPQIVKKE----RRQSSSRFN-LSKN-----   | 117 |
| gi Felis_catus_delta            | TPPPTQLSKIKYSGGPQIVKKE----RRQSSSRFN-LSKN-----   | 103 |
| gi Bos_taurus_delta             | TPPPTQLSKIKYSGGPQIVKKE----RRQSSSRFN-LSKN-----   | 95  |
| gi Canis_lupus_familiaris_delt  | TPPPTQLSKIKYSGGPQIVKKE----RRQSSSRFN-LSKN-----   | 90  |
| gi Macaca_mulatta_delta         | TPPPTQLSKIKYSGGPQIVKKE----RRQSSSRFN-LSKN-----   | 97  |
| gi Homo_sapiens_delta           | TPPPTQLSKIKYSGGPQIVKKE----RRQSSSRFN-LSKN-----   | 97  |
| gi Ovis_aries_delta             | TPPPTQLSKIKYSGGPQIVKKE----RRQSSSRFN-LSKN-----   | 93  |
| gi Falco_peregrinus_delta       | -----                                           |     |
| gi Gallus_gallus_delta          | APPPTQLNKIKYSGGPQIVKKE----RRHSSSRFN-LSKN-----   | 92  |
| gi Alligator_mississippiensis   | APPPTQLNKIKYSGGPQIVKKE----RRHSSSRFN-LSKN-----   | 91  |
| gi Chrysemys_picta_bellii_delt  | TPPPTQLNKIKYSGGPQIVKKE----RRHSSSRFN-LTKN-----   | 93  |
| gi Danio_rerio_delta            | TPPPTQLNKIKYSGGPQIVKKE----RRQSSSRFN-LSKN-----   | 84  |
| gi Ambystoma_mexicanum_delta    | -----                                           |     |
| gi Petromyzon_marinus_S4RN43    | PPPQTQLNKVKYGSPANIVKKE----KRQSSSRFN-VTKN-----   | 74  |
| jgi Branchiostoma_floridiae_237 | -----                                           |     |
| jgi Branchiostoma_floridiae_252 | VPPPTQLTKIKLTGGQQHVVKK---DKRQSSSRFN-ISKNN-----  | 47  |
| gi Strongylocentrotus_purpurat  | -----KGTGTLVKK---DKRQSSSRFN-ISKNN-----          | 55  |

Figure S1. Cont.

|                                 |                                                    |     |
|---------------------------------|----------------------------------------------------|-----|
| gi Caenorhabditis_elegans_PPTR  | -----YGGGPVIPRR----ERRQSSSMFN-ISQN-----            | 41  |
| gi Hydra_vulgaris_delta         | -----ASVQVLKR----DNRQSSSSFN-ISKN-----              | 64  |
| gi Amphimedon_queenslandica_de  | VPIAYNSIVSRLQSGSYTHRT----NSRQGSRRFN-ISKN-----      | 105 |
| gi Drosophila_melanogaster_B56  | APPPTPISKVLNITGTPIVRKE----KRQTSARYN-ASKN-----      | 178 |
| gi Dictyostelium_discoideum_ps  | KNNLTQHQQQQQQHQQLAGGQHGSLLRKSYSRRFHEKPQGE-----     | 107 |
| gi Dictyostelium_purpureum_N/A  | K-----AGQQHGSLLRKSYSRRFHEKPQGE-----                | 64  |
| gi Dictyostelium_fasciculatum   | SKLLGQTPKSEA-----IPLTKNTSLRRSASSRFHEKSKVE-----     | 76  |
| gi Polysphondylium_pallidum_N/  | -----LTPKSE-----IPIKNTINLRRSASSRFHEKSSSE-----      | 54  |
| gi Arabidopsis_thaliana_theta   | DNGASKSGNSQTQNAAPPVKPSADSGFKEGNLKGNGNG-----        | 66  |
| gi Arabidopsis_thaliana_eta     | DNGAASKS-HAKNASPAGKSAASDSGFKDGNLKSSGNNNNNNNGV----- | 87  |
| gi Arabidopsis_thaliana_zeta    | TSISKPSSTSSKSSSASGSRVANG-TLAPNSMSSNRNTNQKKPLGGDAV  | 87  |
| gi Arabidopsis_thaliana_gamma   | SSISKPSSK----SSASNSNGANGTVIAPSSSTSSNR-TNQVN-----   | 76  |
| gi Oryza                        | RATSNLGSQPPIISSTGLSYGSGNRVENPNTRTNGNLYSSSF-----    | 80  |
| gi Oryza_sativa_zeta            | RS-SNLSSQTPVISSSGLSYGSGMHVGNANSRVNGNSVQPTV-----    | 81  |
| gi Oryza_sativa_theta           | SRIANPNNYTAAVTNPGQNYTVKNAHHGGAGVSNGLFAPPVF-----    | 84  |
| gi Oryza_sativa_eta             | RSVEQGN-----KRSGNGDYVVPAGLTPNPMNGTTVVYHSN-----     | 73  |
| gi Arabidopsis_thaliana_delta   | DNGESQT-----LDNNNNQGGGDEVLSQRTSSNGDTSILDCVS-----   | 55  |
| gi Arabidopsis_thaliana_N/A     | TSGGSGSPV-----RSNSGKRMSSAVFPASVVAGIEP-----         | 69  |
| gi Oryza_sativa_kappa           | SCGSIPSGR-----STSTIKRMSSAIFPSSVVAGIEP-----         | 73  |
| gi Oryza_sativa_N/A             | GNGEPPAP-----PAAAAGGGG-----                        | 51  |
| gi Arabidopsis_thaliana_alpha   | NMIVNHASRGSIVPSSPNSMAAATQPPPMYS-----               | 68  |
| gi Arabidopsis_thaliana_beta    | NVVVSHASRGALVNSSP-SPVTATPPPPPLGS-----              | 68  |
| gi Oryza_sativa_N/A_2           | PVTNVHASRAAAPSSPPSPHAAAAASAPSAGAAASNQASSHHHQQ----- | 86  |
| gi Arabidopsis_thaliana_epsilon | RTTTPAPSSVNGESQTTAQSPSQTPNHPMFTTTP-----            | 74  |
| gi Chlamydomonas_reinhardtii_w  | KAGAPAASS----KAPAPRPISAIREKPLPAINEQTLQQQY-----     | 66  |
| gi Schizosaccharomyces_pombe_P  | PIDTTPTPRDEILLENVRT-----VRKQRSSLYHISENR-----       | 102 |
| gi Schizosaccharomyces_pombe_P  | VSQPTPLNKLFLAGAENVDPHSLRPVPRREHSSSQFQVSEKR-----    | 203 |
| gi Ashbya_gossypii_RTS1         | IPRSSHSFERLPTPTKLNPDTDLELIKTPQRHSSSRFEPSPR-----    | 163 |
| gi Saccharomyces_cerevisiae_RT  | IPRSSHSFERLPTPTKLNPDTDLELIKTPQRHSSSRFEPSPR-----    | 270 |
|                                 |                                                    |     |
| gi Aspergillus_niger_N/A        | -----RELEKLQGFHEVPPN-RRQELFMQKIDQCNIIFDFNDP--      | 192 |
| gi Aspergillus_nidulans_parA    | -----RELEKLPGFHEVPPN-RRQELFMQKIDQCNIIFDFNDP--      | 194 |
| gi Mus_musculus_alpha           | -----AELHPLPQLKDATSNEQQELFCQKLQCCVLFDFMDS--        | 87  |
| gi Rattus_norvegicus_alpha      | -----AELHPLPQLKDATSNEQQELFCQKLQCCVLFDFMDS--        | 87  |
| gi Macaca_mulatta_alpha         | -----AELHPLPQLKDATSNEQQDLFCQKLQCCILFDFMDS--        | 87  |
| gi Homo_sapiens_alpha           | -----AELHPLPQLKDATSNEQQELFCQKLQCCILFDFMDS--        | 87  |
| gi Ovis_aries_alpha             | -----PELHPLPQLKDATSNEQQELFCQKLQCCILFDFMDS--        | 90  |
| gi Bos_taurus_alpha             | -----PELHPLPQLKDATSNEQQELFCQKLQCCILFDFMDS--        | 90  |
| gi Felis_catus_alpha            | -----MDS--                                         | 3   |
| gi Canis_lupus_familiaris_alph  | -----MDS--                                         | 3   |
| gi Falco_peregrinus_alpha       | -----VELSPLPQLKDATFN-EQQDLFCQKLQCCVLFDFMDS--       | 77  |
| gi Gallus_gallus_alpha          | -----VELSPLPQLKDATSNEQQDLFCQKLQCCVLFDFMDS--        | 77  |
| gi Alligator_mississippiensis   | -----VELSPLPQLKDATSNEQQELFCQKLQCCILFDFIDS--        | 87  |
| gi Chrysemys_picta_bellii_alph  | -----VELSPLPQLKDATSNEQQDLFCQKLQCCILFDFMDS--        | 77  |
| gi Xenopus_laevis_alpha         | -----VELSPLPALKDATSN-EQQDLFCQKLEQCCVLFDFMDS--      | 76  |
| gi Xenopus_tropicalis_alpha     | -----VELSPLPPLKDATSNEQQDLFCQKLQCCVLFDFMDS--        | 76  |
| gi Ambystoma_mexicanum_alpha    | -----MDS--                                         | 3   |
| gi Danio_rerio_alpha            | -----AAPEISALPQLKDASST-EQHELFMQKLQCCKLFDFYDT--     | 79  |
| gi Petromyzon_marinus_S4RHV1    | -----ELAPLPALADTPAS-EQEELFCCKLQCCVIFDFLDS--        | 77  |
| gi Mus_musculus_epsilon         | -----IELTPLPLKDVPTS-EQPELFLKKLQCCVIFDFMDT--        | 79  |
| gi Rattus_norvegicus_epsilon    | -----IELTPLPLKDVPTS-EQPELFLKKLQCCVIFDFMDT--        | 79  |
| gi Macaca_mulatta_epsilon       | -----IELTPLPLKDVPTS-EQPELFLKKLQCCVIFDFMDT--        | 79  |
| gi Homo_sapiens_epsilon         | -----IELTPLPLKDVPTS-EQPELFLKKLQCCVIFDFMDT--        | 79  |
| gi Ovis_aries_epsilon           | -----IELTPLPLKDVPTS-EQPELFLKKLQCCVIFDFMDT--        | 79  |
| gi Bos_taurus_epsilon           | -----IELTPLPLKDVPTS-EQPELFLKKLQCCVIFDFMDT--        | 79  |
| gi Canis_lupus_familiaris_epsi  | -----IELTPLPLKDVPTS-EQPELFLKKLQCCVIFDFMDT--        | 79  |
| gi Falco_peregrinus_epsilon     | -----IELTPLPLKDVPTS-EQPELFLKKLQCCVIFDFMDT--        | 79  |
| gi Gallus_gallus_epsilon        | -----IELTPLPLKDVPTS-EQPELFLKKLQCCVIFDFMDT--        | 79  |
| gi Felis_catus_epsilon          | -----IELTPLPLKDVPTS-EQPELFLKKLQCCVIFDFMDT--        | 79  |
| gi Chrysemys_picta_bellii_epsi  | -----IELTPLPLKDVPTS-EQPELFLKKLQCCVIFDFMDT--        | 79  |

Figure S1. Cont.

|     |                             |                                                  |     |
|-----|-----------------------------|--------------------------------------------------|-----|
| gi  | Xenopus_laevis_epsilon      | -----IETPLPPLLKDVPTL-EQPELFLKKLQCCGVIFDFMDT--    | 79  |
| gi  | Xenopus_tropicalis_epsilon  | -----IETPLPPLLKDVPTS-EQPELFLKKLQCCGVIFDFMDT--    | 79  |
| gi  | Alligator_mississippiensis  | -----IETPLPPLLK-----ACKALTFTES--                 | 87  |
| gi  | Ambystoma_mexicanum_epsilon | -----IETPLPPLLKDVQNS-EQSEFLKKLQCCVLFDFMET--      | 75  |
| gi  | Danio_rerio_epsilon         | -----IELVALPPLLKDVSAQ-EQPELFLKKLQCCVTFDFMDT--    | 79  |
| gi  | Mus_musculus_beta           | -----QELTPLPPLLKDVPAE-ELHELLSRKLAQCGVMFDFLDC--   | 93  |
| gi  | Rattus_norvegicus_beta      | -----QELTPLPPLLKDVPAE-ELHELLSRKLAQCGVMFDFLDC--   | 93  |
| gi  | Felis_catus_beta            | -----QELTPLPPLLKDVPAE-ELHELLSRKLAQCGVMFDFLDC--   | 93  |
| gi  | Canis_lupus_familiaris_beta | -----QELTPLPPLLKDVPAE-ELHELLSRKLAQCGVMFDFLDC--   | 93  |
| gi  | Homo_sapiens_beta           | -----QELTPLPPLLKDVPAE-ELHELLSRKLAQCGVMFDFLDC--   | 93  |
| gi  | Bos_taurus_beta             | -----QELTPLPPLLKDVPAE-ELHELLSRKLAQCGVMFDFLDC--   | 93  |
| gi  | Ovis_aries_beta             | -----AQAGTPPPSPDVPAE-ELHELLSRKLAQCGVMFDFLDC--    | 93  |
| gi  | Macaca_mulatta_beta         | -----VQAQDALPSPDVPAE-ELHELLSRKLAQCGVMFDFLDC--    | 69  |
| gi  | Xenopus_laevis_beta         | -----                                            |     |
| gi  | Alligator_mississippiensis  | -----QELTPLPPLLKDVAVS-ELHELLGRKLQCCVLFDFLDP--    | 93  |
| gi  | Chrysemys_picta_bellii_beta | -----QELTPLPPLLKDVAVA-ELHELLCKKLQCCVLFDFLDC--    | 93  |
| gi  | Xenopus_tropicalis_beta     | -----QELTPLPPLKDVPAE-ELHDLFCCKLQCCSVIFQFMDC--    | 91  |
| gi  | Danio_rerio_beta            | -----VELTPLPPLLKDVPAE-ELHDLFCCKLQCCVLFDFLDC--    | 92  |
| gi  | Ambystoma_mexicanum_beta    | -----                                            |     |
| gi  | Petromyzon_marinus_S4RGA7   | -----                                            |     |
| gi  | Strongylocentrotus_purpurat | -----NNTEIQQLN-LLKDTTPPEQQELVVKLEQCCMVDFMDA--    | 75  |
| gi  | Drosophila_melanogaster_wdb | -----QDVELQQLPPLKADCSSLEQEELFIRKLRQCCVSDFMDP--   | 74  |
| jgi | Branchiostoma_floridae_237  | -----LPVDAPPAEQHELFIKKLQCCSVVDFMDS--             | 30  |
| gi  | Hydra_vulgaris_alpha        | -----PVAELQPLT-LLKDAPAQERQELFIKKLQCCVTFDFMDP--   | 83  |
| jgi | Branchiostoma_floridae_112  | -----GGTELVPPLQKDATPA-EQQELFLKKLQCCSVLDFDADDC--  | 78  |
| jgi | Branchiostoma_floridae_284  | -----GSLRPFPS-ADATPA-EQQELFLKKLQCCSVLDFDADDC--   | 44  |
| gi  | Caenorhabditis_elegans_PPTR | -----SAQELVQLALIKDTAAN-EQPALVIEKLVQCQHVDFDYDP--  | 104 |
| gi  | Amphimedon_queenslandica_be | -----PPPDYKPLPPLLKDSIQG-DRESLMLQKIAQCCVVFDFSDP-- | 96  |
| gi  | Chrysemys_picta_bellii_gamm | -----FQPVALLHIRDVPPA-EQEKLFIQKLRQCCVLFDFVSDP--   | 59  |
| gi  | Chrysemys_picta_bellii_delt | -----                                            |     |
| gi  | Falco_peregrinus_gamma      | -----FQPVALLHIRDVPPA-DQEKLFIQKLRQCCVLFDFVSDP--   | 59  |
| gi  | Falco_peregrinus_delta/gamm | -----                                            |     |
| gi  | Gallus_gallus_gamma         | -----FQPVALLHIRDVPPA-DQEKLFIQKLRQCCVLFDFVSDP--   | 59  |
| gi  | Alligator_mississippiensis  | -----FQPVALLHIRDVPPA-DQEKLFIQKLRQCCVLFDFVSDP--   | 59  |
| gi  | Alligator_mississippiensis  | -----                                            |     |
| gi  | Ambystoma_mexicanum_gamma   | -----FQPVALLHIRDVPPA-EQEKLFIQKLRQCCVLFDFVSDP--   | 60  |
| gi  | Mus_musculus_gamma          | -----FQPVALLHIRDVPPA-DQEKLFIQKLRQCCVLFDFVSDP--   | 59  |
| gi  | Rattus_norvegicus_gamma     | -----FQPVALLHIRDVPPA-DQEKLFIQKLRQCCVLFDFVSDP--   | 59  |
| gi  | Ovis_aries_gamma            | -----FQPVALLHIRDVPPA-DQEKLFIQKLRQCCVLFDFVSDP--   | 59  |
| gi  | Bos_taurus_gamma            | -----FQPVALLHIRDVPPA-DQEKLFIQKLRQCCVLFDFVSDP--   | 59  |
| gi  | Canis_lupus_familiaris_gamm | -----FQPVALLHIRDVPPA-DQEKLFIQKLRQCCVLFDFVSDP--   | 59  |
| gi  | Macaca_mulatta_gamma        | -----FQPVALLHIRDVPPA-DQEKLFIQKLRQCCVLFDFVSDP--   | 59  |
| gi  | Homo_sapiens_gamma          | -----FQPVLLHIRDVPPA-DQEKLFIQKLRQCCVLFDFVSDP--    | 49  |
| gi  | Felis_catus_gamma           | -----RELQKLPSLKDVPAA-DQEKLFIQKLRQCCVLFDFVSDP--   | 106 |
| gi  | Canis_lupus_familiaris_delt | -----RELQKLPSLKDVPAA-DQEKLFIQKLRQCCVLFDFVSDP--   | 106 |
| gi  | Macaca_mulatta_delta/gamma  | -----RELQKLPSLKDVPAA-DQEKLFIQKLRQCCVLFDFVSDP--   | 341 |
| gi  | Bos_taurus_delta/gamma      | -----RELQKLPSLKDVPAA-DQEKLFIQKLRQCCVLFDFVSDP--   | 113 |
| gi  | Mus_musculus_delta/gamma    | -----RELQKLPSLKDVPAA-DQEKLFIQKLRQCCVLFDFVSDP--   | 116 |
| gi  | Rattus_norvegicus_delta/gam | -----RELQKLPSLKDVPAA-DQEKLFIQKLRQCCVLFDFVSDP--   | 182 |
| gi  | Danio_rerio_gamma           | -----LMHFRDVPPA-EQEKLFVQKLRQCCVLFDFVSDP--        | 59  |
| gi  | Danio_rerio_delta/gamma     | -----RELQKLPSLKDVPAA-EQEKLFVQKLRQCCVLFDFVSDP--   | 112 |
| gi  | Xenopus_laevis_delta/gamma  | -----RELQKLPSLKDVPAA-EQEKLFVQKLRQCCVLFDFVSDP--   | 112 |
| gi  | Xenopus_laevis_gamma        | -----RELQKLPSLKDVPAA-EQEKLFVQKLRQCCVLFDFVSDP--   | 112 |
| gi  | Xenopus_tropicalis_delta/ga | -----RELQKLPSLKDVPAA-EQEKLFVQKLRQCCVLFDFVSDP--   | 112 |
| gi  | Mus_musculus_delta          | -----RELQKLPSLKDVPAA-EQEKLFVQKLRQCCVLFDFVSDP--   | 127 |
| gi  | Rattus_norvegicus_delta     | -----RELQKLPSLKDVPAA-EQEKLFVQKLRQCCVLFDFVSDP--   | 155 |
| gi  | Felis_catus_delta           | -----RELQKLPSLKDVPAA-EQEKLFVQKLRQCCVLFDFVSDP--   | 141 |
| gi  | Bos_taurus_delta            | -----RELQKLPSLKDVPAA-EQEKLFVQKLRQCCVLFDFVSDP--   | 133 |
| gi  | Canis_lupus_familiaris_delt | -----RELQKLPSLKDVPAA-EQEKLFVQKLRQCCVLFDFVSDP--   | 128 |
| gi  | Macaca_mulatta_delta        | -----RELQKLPSLKDVPAA-EQEKLFVQKLRQCCVLFDFVSDP--   | 135 |
| gi  | Homo_sapiens_delta          | -----RELQKLPSLKDVPAA-EQEKLFVQKLRQCCVLFDFVSDP--   | 135 |

Figure S1. Cont.

|                                 |                                                      |     |
|---------------------------------|------------------------------------------------------|-----|
| gi Ovis_aries_delta             | -----RELQKLPALKDSPTQ-EREELFIQKLRQCCVLFDFVSDP-        | 131 |
| gi Falco_peregrinus_delta       | -----MSLLSLTDAPPH-EREELFIQKLRQCCVLFDFISDP-           | 35  |
| gi Gallus_gallus_delta          | -----RELQKLPALKDAPPH-EREELFIQKLRQCCVLFDFISDP-        | 130 |
| gi Alligator_mississippiensis   | -----RELQKLPALKDAPPH-EREELFIQKLRQCCVLFDFISDP-        | 129 |
| gi Chrysemys_picta_bellii_delt  | -----RELQKLPALKDAPAH-EREELFIQKLRQCCVLFDFISDP-        | 131 |
| gi Danio_rerio_delta            | -----RELQKLPALKDAPPI-DREELFVQKLRQCCVLFDFVTDP-        | 122 |
| gi Ambystoma_mexicanum_delta    | -----RELQKLPALKDAPPG-EREELFVQKLRQCCVLFDFVSDP-        | 112 |
| gi Petromyzon_marinus_S4RN43    | -----PAHVDPARPE-EREDLFVQKLRQCCVVFDFVNDP-             | 32  |
| jgi Branchiostoma_floridae_237  | -----RELQKLAALKDARPE-EREDLFVQKLRQCCVVFDFVNDP-        | 85  |
| jgi Branchiostoma_floridae_252  | -----RELQKLPPLKDTPG-EREDLFSKLLQCCVVFDFISDP-          | 93  |
| gi Strongylocentrotus_purpurat  | -----RELQRLPAIKDADPS-ERETLFIQKLRQCCVVFDFFANDA-       | 79  |
| gi Caenorhabditis_elegans_PPTR  | -----RELQKLPPLIKDTNNS-EKESLFIQKLRQCCVLFDFVVDP-       | 102 |
| gi Hydra_vulgaris_delta         | -----REISKLPLKDTPN-AREDLFLQKLHQCSIIFDFNRPD-          | 143 |
| gi Amphimedon_queenslandica_de  | -----CELTALIPLEKTAASEREELFIQKIQQCTLFDFDS-EP-         | 216 |
| gi Drosophila_melanogaster_B56  | -----LTKIANFQDVSPE-ERPSLFLKLLKQCCVYDFSDN--           | 142 |
| gi Dictyostelium_discoideum_ps  | -----LTKIPGFQEVPPPE-ERPSLFLKLLKQCCVYDFSEN--          | 99  |
| gi Dictyostelium_purpureum_N/A  | -----LQQIPGFHDVPPE-ERQSLLIKLLKQCCVVFDFSDTE--         | 112 |
| gi Dictyostelium_fasciculatum   | -----LQQIPAFNVVPPE-ERPNNLLKLLKQCCALFDFSDSE--         | 90  |
| gi Polysphondylium_pallidum_N/  | -----FTPYEALPGFKDVPNA-EKQNLFVRKLSLCCVVFDFSD---       | 103 |
| gi Arabidopsis_thaliana_theta   | -----FTPYEALPSFKDVPNT-EKQNLFIKKLNLRCRVVFDFDFTD---    | 124 |
| gi Arabidopsis_thaliana_eta     | VQAGPFPSSGGVYEALPSFRDVPIS-EKPNLFIKGLSMCCVVFDFSD---   | 133 |
| gi Arabidopsis_thaliana_zeta    | -----GVYEALPSFRDVPNTS-EKPNLFIKKLSMCCVVFDFDND---      | 112 |
| gi Arabidopsis_thaliana_gamma   | -----QPLPSFKDVPNS-EKQNLIRKLLKCCIVDFDFTD---           | 113 |
| gi Oryza                        | -----ELLPSFKDVPNT-EKNNLHVKKLNLCCATFDFDFTD---         | 114 |
| gi Oryza_sativa_zeta            | -----EALPSLRDAPAP-EKPSLFLRKVVVMCVVFDFDFTD---         | 117 |
| gi Oryza_sativa_theta           | -----EPLPAFKDVPAS-EKQNLFVKKVNLCCAVYDFDAD---          | 106 |
| gi Oryza_sativa_eta             | -----SFDVLPRLRDVVIS-EKQELFLKLLRLCCLVDFDFVAE---       | 91  |
| gi Arabidopsis_thaliana_delta   | -----LVPFKDVPSS-EKLNLFVSKVSLCCVTFDFDS---             | 99  |
| gi Arabidopsis_thaliana_N/A     | -----LVSFKDVPNS-EKQNLFVSKLNLCCAVDFDS---              | 103 |
| gi Oryza_sativa_kappa           | -----GAEGE-TREDVFLRKLNVCCVVFDFSSAAA                  | 80  |
| gi Oryza_sativa_N/A             | -----VEPLPLFRDVSVS-ERQSLFLRKLQICCFQDFDFTD---         | 102 |
| gi Arabidopsis_thaliana_alpha   | -----VEPLPLFRDVPVS-ERQTLFLRKLQNCFFLDFDFTD---         | 102 |
| gi Arabidopsis_thaliana_beta    | -QQPAAAPQPPLLEPLPLLRDVAAA-DRPGLLVKRLRLVAALFDFDFTD--- | 131 |
| gi Oryza_sativa_N/A_2           | -----ILEVLPLLKDVSSS-DRPLLFMKKAHMCSCCHDFSD---         | 109 |
| gi Arabidopsis_thaliana_epsilon | -----AEPLPSFRDVSVA-EKQYLFVQKLHLCSFGDFDAD---          | 100 |
| gi Chlamydomonas_reinhardtii_w  | -----NLVRLPSFTDVPVN-KWHSLEKLEQCCVVFDFDNDPS-          | 139 |
| gi Schizosaccharomyces_pombe_P  | -----TLVRLPSFDDVHTS-EREELFIKKLEQCNIIFFDFDNDPS-       | 240 |
| gi Schizosaccharomyces_pombe_P  | -----YTQISKLPGFDDVPPE-EQISLFIKVDQCNIMFDFSDPS-        | 202 |
| gi Ashbya_gossypii_RTS1         | -----YTPLTKLPNFNEVSPE-ERIPLFIAKVDQCNMFDNDPS-         | 309 |
| gi Saccharomyces_cerevisiae_RT  |                                                      |     |
|                                 |                                                      |     |
| gi Aspergillus_niger_N/A        | -----TADMKSKEIKRLALHELLDYIANNRS-----VITEPMY-PR       | 227 |
| gi Aspergillus_nidulans_para    | -----TADMKSKEIKRLALHELLDYIANNRS-----VITEPMY-PR       | 229 |
| gi Mus_musculus_alpha           | -----VSDLKSKEIKRATLNELVEYVS-TNR-----GVIVESAY-SD      | 122 |
| gi Rattus_norvegicus_alpha      | -----VSDLKSKEIKRATLNELVEYVS-TNR-----GVIVESAY-SD      | 122 |
| gi Macaca_mulatta_alpha         | -----VSDLKSKEIKRATLNELVEYVS-TNR-----GVIVESAY-SD      | 122 |
| gi Homo_sapiens_alpha           | -----VSDLKSKEIKRATLNELVEYVS-TNR-----GVIVESAY-SD      | 122 |
| gi Ovis_aries_alpha             | -----VSDLKSKEIKRATLNELVEYVS-TNR-----GVIVESAY-SD      | 125 |
| gi Bos_taurus_alpha             | -----VSDLKSKEIKRATLNELVEYVS-TNR-----GVIVESAY-SD      | 125 |
| gi Felis_catus_alpha            | -----VSDLKSKEIKRATLNELVEYVS-TNR-----GVIVESAY-SD      | 38  |
| gi Canis_lupus_familiaris_alph  | -----VSDLKSKEIKRATLNELVEYVS-TNR-----GVIVESAY-SD      | 38  |
| gi Falco_peregrinus_alpha       | -----VSDLKSKEIKRATLNELVEYVS-TNR-----GVIVESAY-AD      | 112 |
| gi Gallus_gallus_alpha          | -----VSDLKSKEIKRATLNELVEYVS-TNR-----GVIVESAY-AD      | 112 |
| gi Alligator_mississippiensis   | -----VSDLKSKEIKRATLNELVEYVS-TNR-----GVIVESAY-AD      | 122 |
| gi Chrysemys_picta_bellii_alph  | -----VSDLKSKEIKRATLNELVEYVS-TNR-----GVIVESAY-AD      | 112 |
| gi Xenopus_laevis_alpha         | -----ISDLKSKEIKRATLNELVEYVA-TNR-----GVLVETAY-PE      | 111 |
| gi Xenopus_tropicalis_alpha     | -----ISDLKSKEIKRATLNELVEYVS-TNR-----GVLVETAY-PE      | 111 |
| gi Ambystoma_mexicanum_alpha    | -----VSDLKSKEIKRATLNELVEYVS-TNR-----GVIVETAY-PD      | 38  |
| gi Danio_rerio_alpha            | -----VTDLKSKEIKRATLNELVDYVS-TNR-----GVLVEPVY-PE      | 114 |
| gi Petromyzon_marinus_S4RHV1    | -----VSDLKGKEIKRAALNELVDYIT-AGR-----GVLTESVY-PD      | 112 |

Figure S1. Cont.

|                                   |                                                   |     |
|-----------------------------------|---------------------------------------------------|-----|
| gi Mus_musculus_epsilon           | -----LSDLKMKEYKRSTLNELVDY IT-ISR-----GCLTEQTY-PE  | 114 |
| gi Rattus_norvegicus_epsilon      | -----LSDLKMKEYKRSTLNELVDY IT-ISR-----GCLTEQTY-PE  | 114 |
| gi Macaca_mulatta_epsilon         | -----LSDLKMKEYKRSTLNELVDY IT-ISR-----GCLTEQTY-PE  | 114 |
| gi Homo_sapiens_epsilon           | -----LSDLKMKEYKRSTLNELVDY IT-ISR-----GCLTEQTY-PE  | 114 |
| gi Ovis_arie_epsilon              | -----LSDLKMKEYKRSTLNELVDY IT-ISR-----GCLTEQTY-PE  | 114 |
| gi Bos_taurus_epsilon             | -----LSDLKMKEYKRSTLNELVDY IT-ISR-----GCLTEQTY-PE  | 114 |
| gi Canis_lupus_familiaris_epsilon | -----LSDLKMKEYKRSTLNELVDY IT-ISR-----GCLTEQTY-PE  | 114 |
| gi Falco_peregrinus_epsilon       | -----LSDLKMKEYKRSTLNELVDY IT-ISR-----GCLTEQTY-PE  | 114 |
| gi Gallus_gallus_epsilon          | -----LSDLKMKEYKRSTLNELVDY IT-ISR-----GCLTEQTY-PE  | 114 |
| gi Felis_catus_epsilon            | -----LSDLKMKEYKRSTLNELVDY IT-ISR-----GCLTEQTY-PE  | 114 |
| gi Chrysemys_picta_bellii_epsilon | -----LSDLKMKEYKRSTLNELVDY IT-ISR-----GCLTEQTY-PE  | 114 |
| gi Xenopus_laevis_epsilon         | -----LSDLKMKEYKRSTLNELVDY VA-ISR-----GCLTEQTY-PE  | 114 |
| gi Xenopus_tropicalis_epsilon     | -----LSDLKMKEYKRSTLNELVDY IT-ISR-----GCLTEQTY-PE  | 114 |
| gi Alligator_mississippiensis     | -----LFS-----KNTLLISLKTFLN-YKN-----G-----         | 107 |
| gi Ambystoma_mexicanum_epsilon    | -----LSDLKMKEYKRSTLNELVDY IT-ISR-----GCLTEQTY-PE  | 110 |
| gi Danio_rerio_epsilon            | -----LSDLKMKEYKRSTLNELVDY VT-LSR-----GYLTEQTY-PE  | 114 |
| gi Mus_musculus_beta              | -----VADLKGKEVKRAALNELVECVG-CTR-----GVLIEPVY-PD   | 128 |
| gi Rattus_norvegicus_beta         | -----VADLKGKEVKRAALNELVECVG-STR-----GVLIEPVY-PD   | 128 |
| gi Felis_catus_beta               | -----VADLKGKEVKRAALNELVECVG-STR-----GVLIEPVY-PD   | 128 |
| gi Canis_lupus_familiaris_beta    | -----VADLKGKEVKRAALNELVECVG-STR-----GVLIEPVY-PD   | 128 |
| gi Homo_sapiens_beta              | -----VADLKGKEVKRAALNELVECVG-STR-----GVLIEPVY-PD   | 128 |
| gi Bos_taurus_beta                | -----VADLKGKEVKRAALNELVECVG-STR-----GVLIEPVY-PD   | 128 |
| gi Ovis_aries_beta                | -----VADLKGKEVKRAALNELVECVG-STR-----GVLIEPVY-PD   | 128 |
| gi Macaca_mulatta_beta            | -----VADLKGKEVKRAALNELVECVG-STR-----GVLIEPVY-PD   | 104 |
| gi Xenopus_laevis_beta            | -----VADLKGKEVKRAALNELVECVG-STR-----GVLIEPVY-PD   | 104 |
| gi Alligator_mississippiensis     | -----VADLKGKEVKRAALNELVECVG-STR-----GVLIEPVY-PD   | 104 |
| gi Chrysemys_picta_bellii_beta    | -----VADLKGKEVKRAALNELVECVG-STR-----GVLIEPVY-PD   | 104 |
| gi Xenopus_tropicalis_beta        | -----VADLKGKEVKRAALNELVECVG-STR-----GVLIEPVY-PD   | 104 |
| gi Danio_rerio_beta               | -----VADLKGKEVKRAALNELVECVG-STR-----GVLIEPVY-PD   | 104 |
| gi Ambystoma_mexicanum_beta       | -----VADLKGKEVKRAALNELVECVG-STR-----GVLIEPVY-PD   | 104 |
| gi Petrotyzon_marinus_S4RGA7      | -----VADLKGKEVKRAALNELVECVG-STR-----GVLIEPVY-PD   | 104 |
| gi Strongylocentrotus_purpurat    | -----VSELRGKEIKRASLNELVDY IT-TGR-----GVLTEPLY-PE  | 110 |
| gi Drosophila_melanogaster_wdb    | -----VTDLGKEIKRAALNDLSTY IT-HGR-----GVLTEPLY-PE   | 109 |
| jgi Branchiostoma_floridae_237    | -----VSDLKGKEIKRASLNELVDY IT-AGR-----GVLTEQTY-PE  | 65  |
| gi Hydra_vulgaris_alpha           | -----VGDLRGKEVKRGTNLNELVDY IT-SER-----GVLTEPLY-PE | 118 |
| jgi Branchiostoma_floridae_112    | -----VSELRSMEVKRFSLEIIVLDHIG-KT-----GVLLEQTY-PE   | 112 |
| jgi Branchiostoma_floridae_284    | -----VSELRSMEVKRFSLEIIVLDHIG-KT-----GVLLEQTY-PE   | 78  |
| gi Caenorhabditis_elegans_PPTR    | -----VAQLKCKEIKRAALNELIDHIT-STK-----GAIVETIY-PA   | 139 |
| gi Amphimedon_queenslandica_be    | -----MADLRKEIKRAALNELIDY IT-NYK-----EVLSEPLY-PE   | 131 |
| gi Chrysemys_picta_bellii_gamm    | -----LSDLKWKEVKRAALSEMVEY IT-HNR-----NVITEPIY-PE  | 94  |
| gi Chrysemys_picta_bellii_delt    | -----LSDLKWKEVKRAALSEMVEY IT-HNR-----NVITEPIY-PE  | 19  |
| gi Falco_peregrinus_gamma         | -----LSDLKWKEVKRAALSEMVEY IT-HNR-----NVITEPIY-PE  | 94  |
| gi Falco_peregrinus_delta/gamm    | -----LSDLKWKEVKRAALSEMVEY IT-HNR-----NVITEPIY-PE  | 19  |
| gi Gallus_gallus_gamma            | -----LSDLKWKEVKRAALSEMVEY IT-HNR-----NVITEPIY-PE  | 94  |
| gi Alligator_mississippiensis     | -----LSDLKWKEVKRAALSEMVEY IT-HNR-----NVITEPIY-PE  | 94  |
| gi Alligator_mississippiensis     | -----LSDLKWKEVKRAALSEMVEY IT-HNR-----NVITEPIY-PE  | 19  |
| gi Ambystoma_mexicanum_gamma      | -----LSDLKWKEVKRAALSEMVEY IT-HNR-----NVITEPIY-PE  | 95  |
| gi Mus_musculus_gamma             | -----LSDLKWKEVKRAALSEMVEY IT-HNR-----NVITEPIY-PE  | 94  |
| gi Rattus_norvegicus_gamma        | -----LSDLKWKEVKRAALSEMVEY IT-HNR-----NVITEPIY-PE  | 94  |
| gi Ovis_aries_gamma               | -----LSDLKWKEVKRAALSEMVEY IT-HNR-----NVITEPIY-PE  | 94  |
| gi Bos_taurus_gamma               | -----LSDLKWKEVKRAALSEMVEY IT-HNR-----NVITEPIY-PE  | 94  |
| gi Canis_lupus_familiaris_gamm    | -----LSDLKWKEVKRAALSEMVEY IT-HNR-----NVITEPIY-PE  | 94  |
| gi Macaca_mulatta_gamma           | -----LSDLKWKEVKRAALSEMVEY IT-HNR-----NVITEPIY-PE  | 94  |
| gi Homo_sapiens_gamma             | -----LSDLKWKEVKRAALSEMVEY IT-HNR-----NVITEPIY-PE  | 84  |
| gi Felis_catus_gamma              | -----LSDLKWKEVKRAALSEMVEY IT-HNR-----NVITEPIY-PE  | 141 |
| gi Canis_lupus_familiaris_delt    | -----LSDLKWKEVKRAALSEMVEY IT-HNR-----NVITEPIY-PE  | 141 |
| gi Macaca_mulatta_delta/gamma     | -----LSDLKWKEVKRAALSEMVEY IT-HNR-----NVITEPIY-PE  | 376 |
| gi Bos_taurus_delta/gamma         | -----LSDLKWKEVKRAALSEMVEY IT-HNR-----NVITEPIY-PE  | 148 |
| gi Mus_musculus_delta/gamma       | -----LSDLKWKEVKRAALSEMVEY IT-HNR-----NVITEPIY-PE  | 151 |
| gi Rattus_norvegicus_delta/gam    | -----LSDLKWKEVKRAALSEMVEY IT-HNR-----NVITEPIY-PE  | 217 |
| gi Danio_rerio_gamma              | -----LSDLKWKEVKRAALSEMVEY IT-HNR-----NVITEPIY-PE  | 94  |

Figure S1. Cont.

|                                 |                                                    |     |
|---------------------------------|----------------------------------------------------|-----|
| gi Danio_rerio_delta/gamma      | -----LSDLKWKEVKRAALSEMVEYIT-HNR-----NVITEPIY-PE    | 147 |
| gi Xenopus_laevis_delta/gamma   | -----LSDLKWKEVKRAALSEMVEYIT-HNR-----NVITEPIY-PE    | 147 |
| gi Xenopus_laevis_gamma         | -----LSDLKWKEVKRAALSEMVEYIT-HNR-----NVITEPIY-PE    | 147 |
| gi Xenopus_tropicalis_delta/ga  | -----LSDLKWKEVKRAALSEMVEYIT-HNR-----NVITEPIY-PE    | 147 |
| gi Mus_musculus_delta           | -----LSDLKCKEVKRAAGLNEMVEYIT-HSR-----DVVTEAIY-PE   | 162 |
| gi Rattus_norvegicus_delta      | -----LSDLKFKEVKRAAGLNEMVEYIT-HSR-----DVVTEAIY-PE   | 190 |
| gi Felis_catus_delta            | -----LSDLKFKEVKRAAGLNEMVEYIT-HSR-----DVVTEAIY-PE   | 176 |
| gi Bos_taurus_delta             | -----LSDLKFKEVKRAAGLNEMVEYIT-HSR-----DVVTEAIY-PE   | 168 |
| gi Canis_lupus_familiaris_delt  | -----LSDLKFKEVKRAAGLNEMVEYIT-HSR-----DVVTEAIY-PE   | 163 |
| gi Macaca_mulatta_delta         | -----LSDLKFKEVKRAAGLNEMVEYIT-HSR-----DVVTEAIY-PE   | 170 |
| gi Homo_sapiens_delta           | -----LSDLKFKEVKRAAGLNEMVEYIT-HSR-----DVVTEAIY-PE   | 170 |
| gi Ovis_aries_delta             | -----LSDLKFKEVKRAAGLNEMVEYIT-HSR-----DVVTEAIY-PE   | 167 |
| gi Falco_peregrinus_delta       | -----LSDLKFKEVKRAAGLNEMVEYIT-HNR-----DVVTEAIY-PE   | 70  |
| gi Gallus_gallus_delta          | -----LSDLKFKEVKRAAGLNEMVEYIT-HNR-----DVVTEAIY-PE   | 165 |
| gi Alligator_mississippiensis   | -----LSDLKFKEVKRAAGLNEMVEYIT-HNR-----DVITEAIY-PE   | 164 |
| gi Chrysemys_picta_bellii_delt  | -----LSDLKFKEVKRAAGLNEMVEYIT-HNR-----DVVTEAIY-PE   | 166 |
| gi Danio_rerio_delta            | -----LSDLKYKEVKRAAGLNEMVEYIT-HNR-----DVVTEAIY-PE   | 157 |
| gi Ambystoma_mexicanum_delta    | -----LSDLKFKEVKRAAGLNEMVEYIT-HNR-----DVVTEAIY-PE   | 19  |
| gi Petromyzon_marinus_S4RN43    | -----LSDLKWKEVKRAALNEMVEYIT-HSR-----GVITEPIY-PE    | 147 |
| jgi Branchiostoma_floridiae_237 | -----LSDLKWKEVKRAALNEMVEYIT-HNR-----GVITEAVY-PE    | 67  |
| jgi Branchiostoma_floridiae_252 | -----LSDLKWKEVKRAALNEMVEYIT-HNR-----GVITEAVY-PE    | 120 |
| gi Strongylocentrotus_purpurat  | -----LSDLKWKEVKRAALNELVEYIT-HQR-----GIITEAIY-PE    | 128 |
| gi Caenorhabditis_elegans_PPTR  | -----LSDLKFKEVKRAALNELVDHVSGAPK-----GSLSDAVY-PE    | 115 |
| gi Hydra_vulgaris_delta         | -----LSDLKWKEVKRAALNEIVDYLT-HNK-----NVITEPVY-PE    | 137 |
| gi Amphimedon_queenslandica_de  | -----LSDLKFKEVKRAALNELVEFIT-HNR-----GVITESIY-PE    | 178 |
| gi Drosophila_melanogaster_B56  | -----LSDLKFKEVKRAALHEMVDFLT-NQN-----GVITEVIY-PE    | 251 |
| gi Dictyostelium_discoideum_ps  | -----TYMVSCKGVKQEAALLQCVNFLTSTN-----DQPLHESIY-KM   | 176 |
| gi Dictyostelium_purpureum_N/A  | -----NYMVSCKIKQEAALLQCVQFLTSTN-----DQPLHESIY-KM    | 133 |
| gi Dictyostelium_fasciculatum   | -----SDKSSKAIKLEALLQCVFELSTN-----KEVISEPIY-EA      | 146 |
| gi Polysphondylium_pallidum_N/  | -----ADSKSKS IKREALLQCVDYLSST-----KDAYTEAVY-EA     | 124 |
| gi Arabidopsis_thaliana_theta   | -----PTKNVKEKD IKRQTLLLELDYVVASP-----NGKFSETVI-QE  | 139 |
| gi Arabidopsis_thaliana_eta     | -----PTKNIKEKD IKRQTLLLELDYVNSP-----NGKFSEVGI-QE   | 160 |
| gi Arabidopsis_thaliana_zeta    | -----PSKNLKEKE IKRQTLLLELDYVASV-----GKFNVDVSM-QE   | 169 |
| gi Arabidopsis_thaliana_gamma   | -----PSKNLREKE IKRQTLLLELDYIATV-----STKLSDAAM-QE   | 148 |
| gi Oryza                        | -----PTKNIQEKEMKSQTLLLEIVDYVVS-----TVKFPEIVM-LE    | 149 |
| gi Oryza_sativa_zeta            | -----PTKSVKEKEVKRQTLLLELDYIASA-----NGKFPEIIM-QE    | 150 |
| gi Oryza_sativa_theta           | -----PTKDVKEKE IKRQTLLLELDYVTS-----TGKFPEPAV-QE    | 153 |
| gi Oryza_sativa_eta             | -----PTKNLKEKETKRQTLLLELDYVTS-----NGKFSEVVM-SE     | 142 |
| gi Arabidopsis_thaliana_delta   | -----PQQNFKEKE IKRQTLLLEVDYVISSG-----NGKFPESEVI-QE | 128 |
| gi Arabidopsis_thaliana_N/A     | -----DPGKNSIEKDVKRQTLLLELDVFASG-----SVKFTEPAI-LA   | 136 |
| gi Oryza_sativa_kappa           | -----DPNKSSAEKD IKRQTLLLDLIDYVDSS-----SSRFSEAVI-AA | 140 |
| gi Oryza_sativa_N/A             | AAAAERGRDSPERERKRQVLVSLVDCVGAA-----EEPLTEAMI-SG    | 121 |
| gi Arabidopsis_thaliana_alpha   | -----TLKNAREKE IKRQTLLLELDVFIQSGA-----GKLTVCQ-EE   | 138 |
| gi Arabidopsis_thaliana_beta    | -----TIKNARDE IKRQTLLLELDVFIQSGS-----SKISESCQ-EE   | 138 |
| gi Oryza_sativa_N/A_2           | -----SLKHPREKEAKRQALLELDYVQAPSPAANANAPARLPENVQ-EA  | 175 |
| gi Arabidopsis_thaliana_epsilon | -----TLIMPREKE IKRQTLLLELDVFLHSSS-----GKVNETMQ-SE  | 145 |
| gi Chlamydomonas_reinhardtii_w  | -----PTKHVREKE IKRQTLLLELDYVANS-----AGKFTEGVS-ED   | 136 |
| gi Schizosaccharomyces_pombe_P  | -----TDLYGKEVKREALQDLIDLIS-VRK-----EAIDESLY-PS     | 173 |
| gi Schizosaccharomyces_pombe_P  | -----SDLASKE IKREALLMIDYVS-ENR-----GISSASLF-PY     | 274 |
| gi Ashbya_gossypii_RTS1         | -----FDIHGKE IKRITLQELIEFIVTNRF-----TYTEEMY-GH     | 236 |
| gi Saccharomyces_cerevisiae_RT  | -----FDIQGKE IKRSTLDELIEFLVTNRF-----TYTNEMY-AH     | 343 |
|                                 |                                                    |     |
| gi Aspergillus_niger_N/A        | VVEMFAKNLFRPIPPVTPQ-----GEAFDPEEDEPVLEVAWPHIQV---  | 269 |
| gi Aspergillus_nidulans_para    | VVEMFAKNLFRPIPPITPQ-----GEAFDPEEDEPVLEVAWPHIQV---  | 271 |
| gi Mus_musculus_alpha           | IVKMISANIFRTLPPSDN-----PDFDPEEDEPTLEASWPHIQL---    | 161 |
| gi Rattus_norvegicus_alpha      | IVKMISANIFRTLPPSDN-----PDFDPEEDEPTLEASWPHIQL---    | 161 |
| gi Macaca_mulatta_alpha         | IVKMISANIFRTLPPSDN-----PDFDPEEDEPTLEASWPHIQL---    | 161 |
| gi Homo_sapiens_alpha           | IVKMISANIFRTLPPSDN-----PDFDPEEDEPTLEASWPHIQL---    | 161 |
| gi Ovis_aries_alpha             | IVKMISANIFRTLPPSDN-----PDFDPEEDEPTLEASWPHIQL---    | 164 |
| gi Bos_taurus_alpha             | IVKMISANIFRTLPPSDN-----PDFDPEEDEPTLEASWPHIQL---    | 164 |

Figure S1. Cont.

|                                   |                                                     |     |
|-----------------------------------|-----------------------------------------------------|-----|
| gi Felis_catus_alpha              | IVKMISANIFRTLPPSDN-----PDFDPEEDEPTLEASWPHIQL---     | 77  |
| gi Canis_lupus_familiaris_alpha   | IVKMISANIFRTLPPSDN-----PDFDPEEDEPTLEASWPHIQL---     | 77  |
| gi Falco_peregrinus_alpha         | IVKMISNIFRTLPPSDN-----PDFDPEEDEPTLEASWPHIQL---      | 151 |
| gi Gallus_gallus_alpha            | IVKMISNIFRTLPPSDN-----PDFDPEEDEPTLEASWPHIQL---      | 151 |
| gi Alligator_mississippiensis     | IVKMISNIFRTLPPSDN-----PDFDPEEDEPTLEASWPHIQL---      | 161 |
| gi Chrysemys_picta_bellii_alpha   | IVKMISNIFRTLPPSDN-----PDFDPEEDEPTLEASWPHIQL---      | 151 |
| gi Xenopus_laevis_alpha           | IIKMICSNIFRTLPPSDN-----PDFDPEEDEPTLEASWPHIQL---     | 150 |
| gi Xenopus_tropicalis_alpha       | IIKMICSNIFRTLPPSDN-----PDFDPEEDEPTLEASWPHIQL---     | 150 |
| gi Ambystoma_mexicanum_alpha      | IVRMISNIFRTLPPSDN-----PEFDPEEDEPTLEASWPHIQL---      | 77  |
| gi Danio_rerio_alpha              | ITTMVSTNIFRTLPPSEN-----PDFDPEEDEPTLEASWPHIQL---     | 153 |
| gi Petromyzon_marinus_S4RHV1      | IIRMVAYNIFRTLPPSEN-----PEFDPEEDEPTLEASWPHIQL---     | 151 |
| gi Mus_musculus_epsilon           | VVRMVSCNIFRTLPPSDS-----NEFDPEEDEPTLEASWPHIQL---     | 153 |
| gi Rattus_norvegicus_epsilon      | VVRMVSCNIFRTLPPSDS-----NEFDPEEDEPTLEASWPHIQL---     | 153 |
| gi Macaca_mulatta_epsilon         | VVRMVSCNIFRTLPPSDS-----NEFDPEEDEPTLEASWPHIQL---     | 153 |
| gi Homo_sapiens_epsilon           | VVRMVSCNIFRTLPPSDS-----NEFDPEEDEPTLEASWPHIQL---     | 153 |
| gi Ovis_aries_epsilon             | VVRMVSCNIFRTLPPSDS-----NEFDPEEDEPTLEASWPHIQL---     | 153 |
| gi Bos_taurus_epsilon             | VVRMVSCNIFRTLPPSDS-----NEFDPEEDEPTLEASWPHIQL---     | 153 |
| gi Canis_lupus_familiaris_epsilon | VVRMVSCNIFRTLPPSDS-----NEFDPEEDEPTLEASWPHIQL---     | 153 |
| gi Falco_peregrinus_epsilon       | VVRMVSCNIFRTLPPSDS-----NEFDPEEDEPTLEASWPHIQL---     | 153 |
| gi Gallus_gallus_epsilon          | VVRMVSCNIFRTLPPSDS-----NEFDPEEDEPTLEASWPHIQL---     | 153 |
| gi Felis_catus_epsilon            | VVRMVSCNIFRTLPPSDS-----NEFDPEEDEPTLEASWPHIQL---     | 153 |
| gi Chrysemys_picta_bellii_epsilon | VVRMVSCNIFRTLPPSDS-----NEFDPEEDEPTLEASWPHIQL---     | 153 |
| gi Xenopus_laevis_epsilon         | AVRMISVNIFRTLPPSEN-----NEFDPEEDEPTLEASWPHIQL---     | 153 |
| gi Xenopus_tropicalis_epsilon     | VVRMVSCNIFRTLPPSDS-----NEFDPEEDEPTLEASWPHIQL---     | 153 |
| gi Alligator_mississippiensis     | ----VSCNIFRTLPPSDS-----NEFDPEEDEPTLEASWPHIQL---     | 142 |
| gi Ambystoma_mexicanum_epsilon    | VVRMVSYNIFRTLPPSDS-----NEFDPEEDEPTLEASWPHIQL---     | 149 |
| gi Danio_rerio_epsilon            | VVKMVSYNIFRTLPPSDS-----NEFDPEEDEPTLEASWPHIQL---     | 153 |
| gi Mus_musculus_beta              | IIRMISVNIFRTLPPSEN-----PEFDPEEDEPNLEPSWPHIQL---     | 167 |
| gi Rattus_norvegicus_beta         | IIRMISVNIFRTLPPSEN-----PEFDPEEDEPNLEPSWPHIQL---     | 167 |
| gi Felis_catus_beta               | IIRMISVNIFRTLPPSEN-----PEFDPEEDEPNLEPSWPHIQL---     | 167 |
| gi Canis_lupus_familiaris_beta    | IIRMISVNIFRTLPPSEN-----PEFDPEEDEPNLEPSWPHIQL---     | 167 |
| gi Homo_sapiens_beta              | IIRMISVNIFRTLPPSEN-----PEFDPEEDEPNLEPSWPHIQL---     | 167 |
| gi Bos_taurus_beta                | IIRMISVNIFRTLPPSEN-----PEFDPEEDEPNLEPSWPHIQL---     | 167 |
| gi Ovis_aries_beta                | IIRMISVNIFRTLPPSEN-----PEFDPEEDEPNLEPSWPHIQL---     | 167 |
| gi Macaca_mulatta_beta            | IIRMISVNIFRTLPPSEN-----PEFDPEEDEPNLEPSWPHIQL---     | 143 |
| gi Xenopus_laevis_beta            | -----                                               |     |
| gi Alligator_mississippiensis     | AVRMISVNIFRTLPPSEN-----PEFDPEEDEPNLEPSWPHIQL---     | 167 |
| gi Chrysemys_picta_bellii_beta    | IIKMISVNIFRTLPPSEN-----PEFDPEEDEPNLEPSWPHIQL---     | 167 |
| gi Xenopus_tropicalis_beta        | VIKMISVNIFRTLPPPTDN-----PEFDPEEDEPNLEPSWPHIQL---    | 165 |
| gi Danio_rerio_beta               | AIKMISVNIFRTLPPSEN-----PEFDPEEDEPALEASWPHIQL---     | 166 |
| gi Ambystoma_mexicanum_beta       | ---MISGNIFRTLPPSEN-----PEFDPEEDEPNLEPSWPHIQL---     | 36  |
| gi Petromyzon_marinus_S4RGA7      | -----                                               |     |
| gi Strongylocentrotus_purpurat    | CIQMISCNIFRTLPPSEN-----SDFDPEEDDPTLEASWPHIQL---     | 149 |
| gi Drosophila_melanogaster_wdb    | IIRMISCNLFRTLPPSEN-----PDFDPEEDDPTLEASWPHIQL---     | 148 |
| jgi Branchiostoma_floridae_237    | VVKMIASNIFRTLPPSEN-----TEFDPEEDDPTLEASWPHIQL---     | 104 |
| gi Hydra_vulgaris_alpha           | IVRMVANNCFKTLPPSNN-----PDFDPEKNEPTLEASWPHIQL---     | 157 |
| jgi Branchiostoma_floridae_112    | VVKMIAANIFRLPPAEN-----AEFDPEEDEPTLEASWPHIQL---      | 150 |
| jgi Branchiostoma_floridae_284    | VVKMVSTNIFRLPPAEN-----AEFDPEEDEPTLEASWPHIQL---      | 117 |
| gi Caenorhabditis_elegans_PPTR    | VIKMVAKNIFRVLPSEN-----CEFDPEEDEPTLEASWPHIQL---      | 178 |
| gi Xenophedon_queenslandica_be    | IVRMMTTNAFRTLPPLEQG-----TEYDPDEDEPTLEATWPHIQL---    | 171 |
| gi Chrysemys_picta_bellii_gamm    | VVHMFVAVNMFRTLPPSSNPT-----GAEFDPEEDEPTLEAAWPHIQL--- | 136 |
| gi Chrysemys_picta_bellii_delt    | VVHMFVAVNMFRTLPPSSNPT-----GAEFDPEEDEPTLEAAWPHIQL--- | 61  |
| gi Falco_peregrinus_gamma         | VVHMFVAVNMFRTLPPSSNPT-----GAEFDPEEDEPTLEAAWPHIQL--- | 136 |
| gi Falco_peregrinus_delta/gamm    | VVHMFVAVNMFRTLPPSSNPT-----GAEFDPEEDEPTLEAAWPHIQL--- | 61  |
| gi Gallus_gallus_gamma            | VVHMFVAVNMFRTLPPSSNPT-----GAEFDPEEDEPTLEAAWPHIQL--- | 136 |
| gi Alligator_mississippiensis     | VVHMFVAVNMFRTLPPSSNPT-----GAEFDPEEDEPTLEAAWPHIQL--- | 136 |
| gi Alligator_mississippiensis     | VVHMFVAVNMFRTLPPSSNPT-----GAEFDPEEDEPTLEAAWPHIQL--- | 61  |
| gi Ambystoma_mexicanum_gamma      | VVHMFVAVNMFRTLPPSSNPT-----GAEFDPEEDEPTLEAAWPHIQL--- | 137 |
| gi Mus_musculus_gamma             | AVHMFVAVNMFRTLPPSSNPT-----GAEFDPEEDEPTLEAAWPHIQL--- | 136 |
| gi Rattus_norvegicus_gamma        | AVHMFVAVNMFRTLPPSSNPT-----GAEFDPEEDEPTLEAAWPHIQL--- | 136 |
| gi Ovis_aries_gamma               | VVHMFVAVNMFRTLPPSSNPT-----GAEFDPEEDEPTLEAAWPHIQL--- | 136 |

Figure S1. Cont.

|                                 |                                                      |     |
|---------------------------------|------------------------------------------------------|-----|
| gi Bos_taurus_gamma             | VVHMFVAVNMFRITLPPSSNPT-----GAEFDPEEDEPTLEAAWPHLQL--- | 136 |
| gi Canis_lupus_familiaris_gamm  | VVHMFVAVNMFRITLPPSSNPT-----GAEFDPEEDEPTLEAAWPHLQL--- | 136 |
| gi Macaca_mulatta_gamma         | VVHMFVAVNMFRITLPPSSNPT-----GAEFDPEEDEPTLEAAWPHLQL--- | 136 |
| gi Homo_sapiens_gamma           | VVHMFVAVNMFRITLPPSSNPT-----GAEFDPEEDEPTLEAAWPHLQL--- | 126 |
| gi Felis_catus_gamma            | VVHMFVAVNMFRITLPPSSNPT-----GAEFDPEEDEPTLEAAWPHLQL--- | 183 |
| gi Canis_lupus_familiaris_delt  | VVHMFVAVNMFRITLPPSSNPT-----GAEFDPEEDEPTLEAAWPHLQL--- | 183 |
| gi Macaca_mulatta_delta/gamma   | VVHMFVAVNMFRITLPPSSNPT-----GAEFDPEEDEPTLEAAWPHLQL--- | 418 |
| gi Bos_taurus_delta/gamma       | VVHMFVAVNMFRITLPPSSNPT-----GAEFDPEEDEPTLEAAWPHLQL--- | 190 |
| gi Mus_musculus_delta/gamma     | AVHMFVAVNMFRITLPPSSNPT-----GAEFDPEEDEPTLEAAWPHLQL--- | 193 |
| gi Rattus_norvegicus_delta/gam  | AVHMFVAVNMFRITLPPSSNPT-----GAEFDPEEDEPTLEAAWPHLQL--- | 259 |
| gi Danio_rerio_gamma            | VVHMFVAVNMFRITLPPSSNPT-----GAEFDPEEDEPTLEAAWPHLQL--- | 136 |
| gi Danio_rerio_delta/gamma      | VVHMFVAVNMFRITLPPSSNPT-----GAEFDPEEDEPTLEAAWPHLQL--- | 189 |
| gi Xenopus_laevis_delta/gamma   | VVHMFVAVNMFRITLPPSSNPT-----GAEFDPEEDEPTLEAAWPHLQL--- | 189 |
| gi Xenopus_laevis_gamma         | VVHMFVAVNMFRITLPPSSNPT-----GAEFDPEEDEPTLEAAWPHLQL--- | 189 |
| gi Xenopus_tropicalis_delta/ga  | VVHMFVAVNMFRITLPPSSNPT-----GAEFDPEEDEPTLEAAWPHLQL--- | 189 |
| gi Mus_musculus_delta           | AVTMFSVNLFRITLPPSSNPT-----GAEFDPEEDEPTLEAAWPHLQL---  | 204 |
| gi Rattus_norvegicus_delta      | AVTMFSVNLFRITLPPSSNPT-----GAEFDPEEDEPTLEAAWPHLQL---  | 232 |
| gi Felis_catus_delta            | AVTMFSVNLFRITLPPSSNPT-----GAEFDPEEDEPTLEAAWPHLQL---  | 218 |
| gi Bos_taurus_delta             | AVTMFSVNLFRITLPPSSNPT-----GAEFDPEEDEPTLEAAWPHLQL---  | 210 |
| gi Canis_lupus_familiaris_delt  | AVTMFSVNLFRITLPPSSNPT-----GAEFDPEEDEPTLEAAWPHLQL---  | 205 |
| gi Macaca_mulatta_delta         | AVTMFSVNLFRITLPPSSNPT-----GAEFDPEEDEPTLEAAWPHLQVPGQ  | 215 |
| gi Homo_sapiens_delta           | AVTMFSVNLFRITLPPSSNPT-----GAEFDPEEDEPTLEAAWPHLQL---  | 212 |
| gi Ovis_aries_delta             | CTPQFSVNLFRITLPPSSNPT-----GAEFDPEEDEPTLEAAWPHLQL---  | 209 |
| gi Falco_peregrinus_delta       | AVIMFSVNLFRITLPPSSNPT-----GAEFDPEEDEPTLEAAWPHLQL---  | 112 |
| gi Gallus_gallus_delta          | AVIMFSVNLFRITLPPSSNPT-----GAEFDPEEDEPTLEAAWPHLQL---  | 207 |
| gi Alligator_mississippiensis_  | AVIMFSVNLFRITLPPSSNPT-----GAEFDPEEDEPTLEAAWPHLQL---  | 206 |
| gi Chrysemys_picta_bellii_delt  | AVIMFSVNLFRITLPPSSNPT-----GAEFDPEEDEPTLEAAWPHLQL---  | 208 |
| gi Danio_rerio_delta            | AVIMFSVNLFRITLPPSSNPT-----GAEFDPEEDEPTLEAAWPHLQL---  | 199 |
| gi Ambystoma_mexicanum_delta    | AVLMFSVNLFRITLPPSSNPT-----GAEFDPEEDEPTLEAAWPHLQL---  | 61  |
| gi Petromyzon_marinus_S4RN43    | VVHVFAVNMFRITLPPSSNPT-----GAEFDPEEDEPTLEAAWPHLQL---  | 189 |
| jgi Branchiostoma_floridae_237  | AVNMFSINVFRITLPPSSNPN-----GAEFDPEEDEPTLEAAWPHLQI---  | 109 |
| jgi Branchiostoma_floridae_252  | AVNMFSINVFRITLPPSSNPN-----GAEFDPEEDEPTLEAAWPHLQI---  | 162 |
| gi Strongylocentrotus_purpurat  | AVQMFAINMFRITLPPSSNPH-----GAEFDPEEDEPTLEAAWPHLQL---  | 170 |
| gi Caenorhabditis_elegans_PPTR  | AIGMFSVNLFRITLPPSSNPT-----GAEFDPEEDEPTLEAAWPHLQL---  | 157 |
| gi Hydra_vulgaris_delta         | ACNMFSVNVFRALPPSMNPA-----GAEFDPEEDEPTLEAAWPHLQI---   | 179 |
| gi Amphimedon_queenslandica_de  | AVRMFGINAFRALPPSANPS-----GAEFDPEEDEPTLEAAWPHLQI---   | 220 |
| gi Drosophila_melanogaster_B56  | AINMFAVNLFRITLPPSSNPN-----GAEFDPEEDEPTLESSWPHLQL---  | 293 |
| gi Dictyostelium_discoideum_ps  | VFEMVAVNLFRITLPPPRINPY-----GVMYDPEEDEPTLEAAWPHIQV--- | 218 |
| gi Dictyostelium_purpureum_N/A  | LFEMVAVNLFRITLPPPRINPY-----GVMYDPEEDEPTLEAAWPHIQV--- | 175 |
| gi Dictyostelium_fasciculatum_  | VFEMVASNLFRITLPPPRINPY-----GVMYDPEEDEPTLEAAWPHIQI--- | 188 |
| gi Polysphondylium_pallidum_N/  | LFEMISINLFRITLPPPRINPY-----GVMYDPEEDEPTLEAAWPHIQI--- | 166 |
| gi Arabidopsis_thaliana_theta   | VVRMVSVINFRITLNPQPREN---KVIDALDLEEEEPMSDPTWPHLQL---  | 183 |
| gi Arabidopsis_thaliana_eta     | VVRMVSANIFRITLNPQPREN---KVIDALDLEEEEPMSDLAWPHLQL---  | 204 |
| gi Arabidopsis_thaliana_zeta    | LTKMVAVNLFRITLPPSANHES---KILEIHDMDDEEPSLEPAWPHVQV--- | 213 |
| gi Arabidopsis_thaliana_gamma   | IAKVAVVNLFRITLPPSANHES---KILETLVDVDEEPALEPAWPHLQV--- | 192 |
| gi Oryza                        | ITRMISANLFRITLISPPEK---KVLQAFDLEEDAVMDPAWPHLQI---    | 193 |
| gi Oryza_sativa_zeta            | ITRMVSVNLFRITLTPPREN---K-IEAFDVDEEPPVMDPAWPHLQI---   | 193 |
| gi Oryza_sativa_theta           | VIKMVSTNLFRVFNPAAREN---KPLESFDMEEEEPVMDPAWPHLQI---   | 197 |
| gi Oryza_sativa_eta             | ITKMVSINLFRSSSTPREN---KAIEGVLDLEEEPLMDPAWPHLQI---    | 186 |
| gi Arabidopsis_thaliana_delta   | ATKMISANLFSN-PHRQWKN---KTPEALDLEEEEGSLNPSWPHLQI---   | 171 |
| gi Arabidopsis_thaliana_N/A     | MCRMCAVNLFRVFPNRYSS---S---GGENDD-EPMFDPWPHLQI---     | 177 |
| gi Oryza_sativa_kappa           | SSRMFAVNLFRVFPNRYSS---SSGGGEGEEE-EPMFEPWPHLQI---     | 183 |
| gi Oryza_sativa_N/A             | CVRMFAINLFRVFPKVRSG---AAGAAEDED-EPPFDPSWPHLQA---     | 164 |
| gi Arabidopsis_thaliana_alpha   | MVKMISVNIIFRCLPPASHEN-TGQEP---ADLEEEEPYLEPSWPHLQI--- | 182 |
| gi Arabidopsis_thaliana_beta    | MIKMISVNIIFRSLPPASHEN-TGQEP---ADPEEEEPYLEPSWPHLQI--- | 182 |
| gi Oryza_sativa_N/A_2           | LVAASVNVFRITLPPALHESAAAIDPGAAPDDEEPPYLDPAWPHLQI---   | 222 |
| gi Arabidopsis_thaliana_epsilon | LIRMVSANIFRCLPPAYHEN-TGAPPEGNDPEEEEPYLEPWWPHLQI---   | 191 |
| gi Chlamydomonas_reinhardtii_w  | IIYMLSNNLFRITLPPVRSBG---DAEGNYDAEEEPYLDPAWPHLQI---   | 180 |
| gi Schizosaccharomyces_pombe_P  | IVHMFVAVNVFRITLPPSNPP-----GEIMDLEEDPALEVAWPHLHL---   | 215 |
| gi Schizosaccharomyces_pombe_P  | VVNTSLNVFRITLPPSNNDY-----SSDMFALDDEPFLFPAWPHLEE---   | 316 |
| gi Ashbya_gossypii_RTS1         | VVNMFKVNLFRITLPPVNPVIG-----DVYDPEDEPVLNLAWPHMQC---   | 278 |

Figure S1. Cont.



|                                |                                                     |     |
|--------------------------------|-----------------------------------------------------|-----|
| gi Saccharomyces_cerevisiae_RT | VVNMFKINLFRPIPPPVPVVG-----DIYDPDEDEFPVNELAWPHMQA--- | 385 |
| gi Aspergillus_niger_N/A       | -----VYEFFLRFIESQDFNTNIAKQYIDHHFVLQLELFDSEDPRER     | 312 |
| gi Aspergillus_nidulans_parA   | -----VYEFFLRFIESQDFNTNIAKAYIDHHFVLQLELFDSEDPRER     | 314 |
| gi Mus_musculus_alpha          | -----VYEFFLRFLESQDFQPSIAKRYIDQKFVQQLLELFDSEDPRER    | 204 |
| gi Rattus_norvegicus_alpha     | -----VYEFFLRFLESQDFQPSIAKRYIDQKFVQQLLELFDSEDPRER    | 204 |
| gi Macaca_mulatta_alpha        | -----VYEFFLRFLESQDFQPSIAKRYIDQKFVQQLLELFDSEDPRER    | 204 |
| gi Homo_sapiens_alpha          | -----VYEFFLRFLESQDFQPSIAKRYIDQKFVQQLLELFDSEDPRER    | 204 |
| gi Ovis_aries_alpha            | -----VYEFFLRFLESQDFQPSIAKRYIDQKFVQQLLELFDSEDPRER    | 207 |
| gi Bos_taurus_alpha            | -----VYEFFLRFLESQDFQPSIAKRYIDQKFVQQLLELFDSEDPRER    | 207 |
| gi Felis_catus_alpha           | -----VYEFFLRFLESQDFQPSIAKRYIDQKFVQQLLELFDSEDPRER    | 120 |
| gi Canis_lupus_familiaris_alph | -----VYEFFLRFLESQDFQPSIAKRYIDQKFVQQLLELFDSEDPRER    | 120 |
| gi Falco_peregrinus_alpha      | -----VYEFFLRFLESQDFQPSIAKRYIDQKFVQQLLELFDSEDPRER    | 194 |
| gi Gallus_gallus_alpha         | -----VYEFFLRFLESQDFQPSIAKRYIDQKFVQQLLELFDSEDPRER    | 194 |
| gi Alligator_mississippiensis  | -----VYEFFLRFLESQDFQPSIAKRYIDQKFVQQLLELFDSEDPRER    | 204 |
| gi Chrysemys_picta_bellii_alph | -----VYEFFLRFLESQDFQPSIAKRYIDQKFVQQLLELFDSEDPRER    | 194 |
| gi Xenopus_laevis_alpha        | -----VYEFFLRFLESQDFQPSIAKRYVDQKFVQQLLELFDSEDPRER    | 193 |
| gi Xenopus_tropicalis_alpha    | -----VYEFFLRFLESQDFQPSIAKRYVDQKFVQQLLELFDSEDPRER    | 193 |
| gi Ambystoma_mexicanum_alpha   | -----VYEFFLRFLESQDFQPSIAKRYVDQKFVQQLLELFDSEDPRER    | 120 |
| gi Danio_rerio_alpha           | -----VYEFFLRFLENPDFQPSIAKRYIDQKFVLQLELFDSEDPRER     | 196 |
| gi Petromyzon_marinus_S4RHV1   | -----VYEFFLRFLEQEFQPSIAKRYIDQKFVLQLELFDSEDPRER      | 194 |
| gi Mus_musculus_epsilon        | -----VYEFFIRFLESQEFQPSIAKRYIDQKFVLQLELFDSEDPRER     | 196 |
| gi Rattus_norvegicus_epsilon   | -----VYEFFIRFLESQEFQPSIAKRYIDQKFVLQLELFDSEDPRER     | 196 |
| gi Macaca_mulatta_epsilon      | -----VYEFFIRFLESQEFQPSIAKRYIDQKFVLQLELFDSEDPRER     | 196 |
| gi Homo_sapiens_epsilon        | -----VYEFFIRFLESQEFQPSIAKRYIDQKFVLQLELFDSEDPRER     | 196 |
| gi Ovis_aries_epsilon          | -----VYEFFIRFLESQEFQPSIAKRYIDQKFVLQLELFDSEDPRER     | 196 |
| gi Bos_taurus_epsilon          | -----VYEFFIRFLESQEFQPSIAKRYIDQKFVLQLELFDSEDPRER     | 196 |
| gi Canis_lupus_familiaris_epsi | -----VYEFFIRFLESQEFQPSIAKRYIDQKFVLQLELFDSEDPRER     | 196 |
| gi Falco_peregrinus_epsilon    | -----VYEFFIRFLESQEFQPSIAKRYIDQKFVLQLELFDSEDPRER     | 196 |
| gi Gallus_gallus_epsilon       | -----VYEFFIRFLESQEFQPSIAKRYIDQKFVLQLELFDSEDPRER     | 196 |
| gi Felis_catus_epsilon         | -----VYEFFIRFLESQEFQPSIAKRYIDQKFVLQLELFDSEDPRER     | 196 |
| gi Chrysemys_picta_bellii_epsi | -----VYEFFIRFLESQEFQPSIAKRYIDQKFVLQLELFDSEDPRER     | 196 |
| gi Xenopus_laevis_epsilon      | -----VYEFFIRFLESQEFQPSIAKRYIDQKFVLQLELFDSEDPRER     | 196 |
| gi Xenopus_tropicalis_epsilon  | -----VYEFFIRFLESQEFQPSIAKRYIDQKFVLQLELFDSEDPRER     | 196 |
| gi Alligator_mississippiensis  | -----VYEFFIRFLESQEFQPSIAKRYIDQKFVLQLELFDSEDPRER     | 185 |
| gi Ambystoma_mexicanum_epsilon | -----VYEFFIRFLESQEFQPSIAKRYIDQKFVLQLELFDSEDPRER     | 192 |
| gi Danio_rerio_epsilon         | -----VYEFFIRFLESQEFQPSIAKRYIDQKFVLQLELFDSEDPRER     | 196 |
| gi Mus_musculus_beta           | -----VYEFFLRFLESQDFQPSIAKRYVDQKFVLMLELFDSEDPRER     | 210 |
| gi Rattus_norvegicus_beta      | -----VYEFFLRFLESQDFQPSIAKRYVDQKFVLMLELFDSEDPRER     | 210 |
| gi Felis_catus_beta            | -----VYEFFLRFLESQDFQPSIAKRYVDQKFVLMLELFDSEDPRER     | 210 |
| gi Canis_lupus_familiaris_beta | -----VYEFFLRFLESQDFQPSIAKRYVDQKFVLMLELFDSEDPRER     | 210 |
| gi Homo_sapiens_beta           | -----VYEFFLRFLESQDFQPSIAKRYVDQKFVLMLELFDSEDPRER     | 210 |
| gi Bos_taurus_beta             | -----VYEFFLRFLESQDFQPSIAKRYVDQKFVLMLELFDSEDPRER     | 210 |
| gi Ovis_aries_beta             | -----VYEFFLRFLESQDFQPSIAKRYVDQKFVLMLELFDSEDPRER     | 210 |
| gi Macaca_mulatta_beta         | -----GFFIRVMDFISF-----ISLDFETYVAQSR                 | 169 |
| gi Xenopus_laevis_beta         | -----VYEFFLRFLESQDFQPSIAKRYVDQKFVLMLELFDSEDPRER     | 210 |
| gi Alligator_mississippiensis  | -----VYEFFLRFLESQDFQPSIAKRYVDQKFVLMLELFDSEDPRER     | 210 |
| gi Chrysemys_picta_bellii_beta | -----VYEFFLRFLESQDFQPSIAKRYVDQKFVLMLELFDSEDPRER     | 210 |
| gi Xenopus_tropicalis_beta     | -----VYEFFLRFLESQDFQPSIAKRYVDQKFVLMLELFDSEDPRER     | 208 |
| gi Danio_rerio_beta            | -----VYEFFLRFLESQDFQPSIAKRYVDQKFVLMLELFDSEDPRER     | 209 |
| gi Ambystoma_mexicanum_beta    | -----VYEFFLRFLESQDFQPSIAKRYVDQKFVMTLLDLFDSEDPRER    | 79  |
| gi Petromyzon_marinus_S4RGA7   | -----VYEFFLRFLESQDFQPSIAKRYVDQKFVMTLLDLFDSEDPRER    | 192 |
| gi Strongylocentrotus_purpurat | -----VYEFFLRFLESQDFQPSIAKRYVDQKFVMTLLDLFDSEDPRER    | 192 |
| gi Drosophila_melanogaster_wdb | -----VYEFFLRFLESQDFQPSIAKRYVDQKFVMTLLDLFDSEDPRER    | 191 |
| jgi Branchiostoma_floridae_237 | -----VYEFFLRFLESQDFQPSIAKRYVDQKFVMTLLDLFDSEDPRER    | 147 |
| gi Hydra_vulgaris_alpha        | -----VYEFFLRFLESQDFQPSIAKRYVDQKFVMTLLDLFDSEDPRER    | 200 |
| jgi Branchiostoma_floridae_112 | -----VYEFFLRFLESQDFQPSIAKRYVDQKFVMTLLDLFDSEDPRER    | 160 |
| jgi Branchiostoma_floridae_284 | -----VYEFFLRFLESQDFQPSIAKRYVDQKFVMTLLDLFDSEDPRER    | 221 |
| gi Caenorhabditis_elegans_PPTR | -----VYAFFLRFLESQDFQPSIAKRYVDQKFVMTLLDLFDSEDPRER    | 214 |
| gi Amphimedon_queenslandica_be | -----VYAFFLRFLESQDFQPSIAKRYVDQKFVMTLLDLFDSEDPRER    | 214 |

Figure S1. Cont.

|                                |                                                   |     |
|--------------------------------|---------------------------------------------------|-----|
| gi Chrysemys_picta_bellii_gamm | -----VYEFFLRFLFESPDFQPNVAKKY IDQKFVLQLELFDSEDPRE  | 179 |
| gi Chrysemys_picta_bellii_delt | -----VYEFFLRFLFESPDFQPNVAKKY IDQKFVLQLELFDSEDPRE  | 104 |
| gi Falco_peregrinus_gamma      | -----VYEFFLRFLFESPDFQPNIAKKY IDQKFVLQLELFDSEDPRE  | 179 |
| gi Falco_peregrinus_delta/gamm | -----VYEFFLRFLFESPDFQPNIAKKY IDQKFVLQLELFDSEDPRE  | 104 |
| gi Gallus_gallus_gamma         | -----VYEFFLRFLFESPDFQPNIAKKY IDQKFVLQLELFDSEDPRE  | 179 |
| gi Alligator_mississippiensis_ | -----VYEFFLRFLFESPDFQPNIAKKY IDQKFVLQLELFDSEDPRE  | 179 |
| gi Alligator_mississippiensis_ | -----VYEFFLRFLFESPDFQPNIAKKY IDQKFVLQLELFDSEDPRE  | 104 |
| gi Ambystoma_mexicanum_gamma   | -----VYEFFLRFLFESPDFQPNVAKKY IDQKFVLQLELFDSEDPRE  | 180 |
| gi Mus_musculus_gamma          | -----VYEFFLRFLFESPDFQPNIAKKY IDQKFVLQLELFDSEDPRE  | 179 |
| gi Rattus_norvegicus_gamma     | -----VYEFFLRFLFESPDFQPNIAKKY IDQKFVLQLELFDSEDPRE  | 179 |
| gi Ovis_aries_gamma            | -----VYEFFLRFLFESPDFQPNIAKKY IDQKFVLQLELFDSEDPRE  | 179 |
| gi Bos_taurus_gamma            | -----VYEFFLRFLFESPDFQPNIAKKY IDQKFVLQLELFDSEDPRE  | 179 |
| gi Canis_lupus_familiaris_gamm | -----VYEFFLRFLFESPDFQPNIAKKY IDQKFVLQLELFDSEDPRE  | 179 |
| gi Macaca_mulatta_gamma        | -----VYEFFLRFLFESPDFQPNIAKKY IDQKFVLQLELFDSEDPRE  | 179 |
| gi Homo_sapiens_gamma          | -----VYEFFLRFLFESPDFQPNIAKKY IDQKFVLQLELFDSEDPRE  | 169 |
| gi Felis_catus_gamma           | -----VYEFFLRFLFESPDFQPNIAKKY IDQKFVLQLELFDSEDPRE  | 226 |
| gi Canis_lupus_familiaris_delt | -----VYEFFLRFLFESPDFQPNIAKKY IDQKFVLQLELFDSEDPRE  | 226 |
| gi Macaca_mulatta_delta/gamma  | -----VYEFFLRFLFESPDFQPNIAKKY IDQKFVLQLELFDSEDPRE  | 461 |
| gi Bos_taurus_delta/gamma      | -----VYEFFLRFLFESPDFQPNIAKKY IDQKFVLQLELFDSEDPRE  | 233 |
| gi Mus_musculus_delta/gamma    | -----VYEFFLRFLFESPDFQPNIAKKY IDQKFVLQLELFDSEDPRE  | 236 |
| gi Rattus_norvegicus_delta/gam | -----VYEFFLRFLFESPDFQPNIAKKY IDQKFVLQLELFDSEDPRE  | 302 |
| gi Danio_rerio_gamma           | -----VYEFFLRFLFESPDFQPNIAKKY IDQKFVLQLELFDSEDPRE  | 179 |
| gi Danio_rerio_delta/gamma     | -----VYEFFLRFLFESPDFQPNIAKKY IDQKFVLQLELFDSEDPRE  | 232 |
| gi Xenopus_laevis_delta/gamma  | -----VYEFFLRFLFESPDFQPNVAKKY IDQKFVLQLELFDSEDPRE  | 232 |
| gi Xenopus_laevis_gamma        | -----VYEFFLRFLFESPDFQPNVAKKY IDQKFVLQLELFDSEDPRE  | 232 |
| gi Xenopus_tropicalis_delta/ga | -----VYEFFLRFLFESPDFQPNVAKKY IDQKFVLQLELFDSEDPRE  | 232 |
| gi Mus_musculus_delta          | -----VYEFFLRFLFESPDFQPNIAKKY IDQKFVLALLDLFDSEDPRE | 247 |
| gi Rattus_norvegicus_delta     | -----VYEFFLRFLFESPDFQPNIAKKY IDQKFVLALLDLFDSEDPRE | 275 |
| gi Felis_catus_delta           | -----VYEFFLRFLFESPDFQPNIAKKY IDQKFVLALLDLFDSEDPRE | 261 |
| gi Bos_taurus_delta            | -----VYEFFLRFLFESPDFQPNIAKKY IDQKFVLALLDLFDSEDPRE | 253 |
| gi Canis_lupus_familiaris_delt | -----VYEFFLRFLFESPDFQPNIAKKY IDQKFVLALLDLFDSEDPRE | 248 |
| gi Macaca_mulatta_delta        | GGQVGPGCREWGSRGXXXXXXX-XXKKY IDQKFVLALLDLFDSEDPRE | 264 |
| gi Homo_sapiens_delta          | -----VYEFFLRFLFESPDFQPNIAKKY IDQKFVLALLDLFDSEDPRE | 255 |
| gi Ovis_aries_delta            | -----VYEFFLRFLFESPDFQPNIAKKY IDQKFVLALLDLFDSEDPRE | 252 |
| gi Falco_peregrinus_delta      | -----VYEFFLRFLFESPDFQPNVAKKY IDQKFVLSLLDLFDSEDPRE | 155 |
| gi Gallus_gallus_delta         | -----VYEFFLRFLFESPDFQPNIAKKY IDQKFVLSLLDLFDSEDPRE | 250 |
| gi Alligator_mississippiensis_ | -----VYEFFLRFLFESPDFQPNVAKKY IDQKFVLSLLDLFDSEDPRE | 249 |
| gi Chrysemys_picta_bellii_delt | -----VYEFFLRFLFESPDFQPNIAKKY IDQKFVLSLLDLFDSEDPRE | 251 |
| gi Danio_rerio_delta           | -----VYEFFLRFLFESPDFQPNIAKKY IDQKFVLSLLDLFDSEDPRE | 242 |
| gi Ambystoma_mexicanum_delta   | -----VYEFFLRFLFESPDFQPNVAKKY IDQKFVMSLLDLFDSEDPRE | 104 |
| gi Petromyzon_marinus_S4RN43   | -----VYEFFLRFLFESPDFQPNVAKKY IDQKFVLQLELFDSEDPRE  | 232 |
| jgi Branchiostoma_floridae_237 | -----VYEFFLRFLFESPDFQPNIAKKY IDQKFVLQLELFDSEDPRE  | 152 |
| jgi Branchiostoma_floridae_252 | -----VYEFFLRFLFESPDFQPNIAKKY IDQKFVLQLELFDSEDPRE  | 205 |
| gi Strongylocentrotus_purpurat | -----VYEFFLRFLFESPDFQPNVAKKY IDQKFVLALLELFDSEDPRE | 213 |
| gi Caenorhabditis_elegans_PPTR | -----VYEFFLRFLFESPDFQPNIAKKY IDQKFVLSLLDLFDSEDPRE | 200 |
| gi Hydra_vulgaris_delta        | -----VYEFFLRFLFESPDFQPNIAKKY IDQKFVLSLLDLFDSEDPRE | 222 |
| gi Amphimedon_queenslandica_de | -----VYEFFLRFLFESPDFQPNIAKKY IDQKFVLSLLDLFDSEDPRE | 263 |
| gi Drosophila_melanogaster_B56 | -----VYEFFLRFLFESPDFQPNIAKKY IDQKFVLSLLDLFDSEDPRE | 336 |
| gi Dictyostelium_discoideum_ps | -----VYEFFLRFLFESPDFQPNIAKKY IDQKFVLSLLDLFDSEDPRE | 261 |
| gi Dictyostelium_purpureum_N/A | -----VYEFFLRFLFESPDFQPNIAKKY IDQKFVLSLLDLFDSEDPRE | 218 |
| gi Dictyostelium_fasciculatum_ | -----VYEFFLRFLFESPDFQPNIAKKY IDQKFVLSLLDLFDSEDPRE | 231 |
| gi Polysphondylium_pallidum_N/ | -----VYEFFLRFLFESPDFQPNIAKKY IDQKFVLSLLDLFDSEDPRE | 209 |
| gi Arabidopsis_thaliana_theta  | -----VYEFFLRFLFESPDFQPNIAKKY IDQKFVLSLLDLFDSEDPRE | 226 |
| gi Arabidopsis_thaliana_eta    | -----VYEFFLRFLFESPDFQPNIAKKY IDQKFVLSLLDLFDSEDPRE | 247 |
| gi Arabidopsis_thaliana_zeta   | -----VYEFFLRFLFESPDFQPNIAKKY IDQKFVLSLLDLFDSEDPRE | 256 |
| gi Arabidopsis_thaliana_gamma  | -----VYEFFLRFLFESPDFQPNIAKKY IDQKFVLSLLDLFDSEDPRE | 235 |
| gi Oryza                       | -----VYEFFLRFLFESPDFQPNIAKKY IDQKFVLSLLDLFDSEDPRE | 236 |
| gi Oryza_sativa_zeta           | -----VYEFFLRFLFESPDFQPNIAKKY IDQKFVLSLLDLFDSEDPRE | 236 |
| gi Oryza_sativa_theta          | -----VYEFFLRFLFESPDFQPNIAKKY IDQKFVLSLLDLFDSEDPRE | 240 |
| gi Oryza_sativa_eta            | -----VYEFFLRFLFESPDFQPNIAKKY IDQKFVLSLLDLFDSEDPRE | 229 |
| gi Arabidopsis_thaliana_delta  | -----VYEFFLRFLFESPDFQPNIAKKY IDQKFVLSLLDLFDSEDPRE | 214 |

Figure S1. Cont.

|    |                                |                                                     |     |
|----|--------------------------------|-----------------------------------------------------|-----|
| gi | Arabidopsis_thaliana_N/A       | -----VYDLLKFITSPCLDAKVAKYLDHAFIVRLLDLFDSEDPRE       | 220 |
| gi | Oryza_sativa_kappa             | -----VYELLKFIGSSSLDAKVGKKYFDHSFIVKLLNLLDSEDPRE      | 226 |
| gi | Oryza_sativa_N/A               | -----VYELLRLRFVMSPVVDVKIARKYMDNSFVSRLLDLFDSDPRE     | 207 |
| gi | Arabidopsis_thaliana_alpha     | -----IYELLRYIVPSD TD TKVAKRY IDHSFVLRLLELFETEDPRE   | 225 |
| gi | Arabidopsis_thaliana_beta      | -----VYELLRYVVS TD TD TKVAKRY IDHSFVLKLLDLFDSEDPRE  | 225 |
| gi | Oryza_sativa_N/A_2             | -----VYELLRYVVS PD TD TKVAKRYVDHAFVRLLDLFDSEDPRE    | 265 |
| gi | Arabidopsis_thaliana_epsilon   | -----VYELLRYVVSSEIEPKTAKKF INHTFVSRLLDLFDSEDPRE     | 234 |
| gi | Chlamydomonas_reinhardtii_w    | -----VYEFLLRYVVSNDTDAKIAKKYIDQQFVLKLELFDSEDPRE      | 223 |
| gi | Schizosaccharomyces_pombe_P    | -----VYDFFLRFFESPSLNTSVAKVYINQKFIRKLLVLFDSSEDPRE    | 258 |
| gi | Schizosaccharomyces_pombe_P    | -----VYLLFIKFLSPDFRASKAKSLVDRFFNRLLALFDTEDPRE       | 359 |
| gi | Ashbya_gossypii_RTS1           | -----VYEFFLRFVESPD FNHQIAKQFIDQF ILKLELFDSEDIRER    | 321 |
| gi | Saccharomyces_cerevisiae_RT    | -----VYEFFLRFVESPD FNHQIAKQYIDQF ILKLELFDSEDIRER    | 428 |
|    |                                |                                                     |     |
| gi | Aspergillus_niger_N/A          | DFLKTTLHRIYKGFNLNR-----SYIRRSINN VFFQFYETERFNGIAEL  | 357 |
| gi | Aspergillus_nidulans_para      | DFLKTTLHRIYKGFNLNR-----SYIRRSINN VFFQFSYETERFNGIAEL | 359 |
| gi | Mus_musculus_alpha             | DFLKTVLHRIYKGFGLR-----AFIRKQINNIFLRFIYETEHFNGVAEL   | 249 |
| gi | Rattus_norvegicus_alpha        | DFLKTVLHRIYKGFGLR-----AFIRKQTNNIFLRFIYETEHFNGVAEL   | 249 |
| gi | Macaca_mulatta_alpha           | DFLKTVLHRIYKGFGLR-----AFIRKQINNIFLRFIYETEHFNGVAEL   | 249 |
| gi | Homo_sapiens_alpha             | DFLKTVLHRIYKGFGLR-----AFIRKQINNIFLRFIYETEHFNGVAEL   | 249 |
| gi | Ovis_aries_alpha               | DFLKTVLHRIYKGFGLR-----AFIRKQINNIFLRFIYETEHFNGVAEL   | 252 |
| gi | Bos_taurus_alpha               | DFLKTVLHRIYKGFGLR-----AFIRKQINNIFLRFIYETEHFNGVAEL   | 252 |
| gi | Felis_catus_alpha              | DFLKTVLHRIYKGFGLR-----AFIRKQINNIFLRFIYETEHFNGVAEL   | 165 |
| gi | Canis_lupus_familiaris_alpha   | DFLKTVLHRIYKGFGLR-----AFIRKQINNIFLRFIYETEHFNGVAEL   | 165 |
| gi | Falco_peregrinus_alpha         | DFLKTVLHRIYKGFGLR-----AFIRKQINNIFLRFIYETEHFNGVAEL   | 239 |
| gi | Gallus_gallus_alpha            | DFLKTVLHRIYKGFGLR-----AFIRKQINNIFLRFIYETEHFNGVAEL   | 239 |
| gi | Alligator_mississippiensis     | DFLKTVLHRIYKGFGLR-----AFIRKQINNIFLRFIYETEHFNGVAEL   | 249 |
| gi | Chrysemys_picta_bellii_alpha   | DFLKTVLHRIYKGFGLR-----AFIRKQINNIFLRFIYETEHFNGVAEL   | 239 |
| gi | Xenopus_laevis_alpha           | DFLKTVLHRIYKGFGLR-----AFIRKQINNIFLRFIYETEHFNGVAEL   | 238 |
| gi | Xenopus_tropicalis_alpha       | DFLKTVLHRIYKGFGLR-----AFIRKQINNIFLRFIYETEHFNGVAEL   | 238 |
| gi | Ambystoma_mexicanum_alpha      | DFLKTVLHRIYKGFGLR-----AFIRKQINNIFLRFIYETEHFNGVAEL   | 165 |
| gi | Danio_rerio_alpha              | EFLKTLHRIYKGFGLR-----AFIRKQINNIFLRFIYETEHFNGVAEL    | 241 |
| gi | Petromyzon_marinus_S4RHV1      | DFLRTVLHRIYKGLLGLR-----AFIRTQINNILLRYIYETERFNGVGM   | 239 |
| gi | Mus_musculus_epsilon           | DYLKTVLHRIYKGFGLR-----AFIRKQINNIFLRFVYETEHFNGVAEL   | 241 |
| gi | Rattus_norvegicus_epsilon      | DYLKTVLHRIYKGFGLR-----AFIRKQINNIFLRFVYETEHFNGVAEL   | 241 |
| gi | Macaca_mulatta_epsilon         | DYLKTVLHRIYKGFGLR-----AFIRKQINNIFLRFVYETEHFNGVAEL   | 241 |
| gi | Homo_sapiens_epsilon           | DYLKTVLHRIYKGFGLR-----AFIRKQINNIFLRFVYETEHFNGVAEL   | 241 |
| gi | Ovis_aries_epsilon             | DYLKTVLHRIYKGFGLR-----AFIRKQINNIFLRFVYETEHFNGVAEL   | 241 |
| gi | Bos_taurus_epsilon             | DYLKTVLHRIYKGFGLR-----AFIRKQINNIFLRFVYETEHFNGVAEL   | 241 |
| gi | Canis_lupus_familiaris_epsilon | DYLKTVLHRIYKGFGLR-----AFIRKQINNIFLRFVYETEHFNGVAEL   | 241 |
| gi | Falco_peregrinus_epsilon       | DYLKTVLHRIYKGFGLR-----AFIRKQINNIFLRFVYETEHFNGVAEL   | 241 |
| gi | Gallus_gallus_epsilon          | DYLKTVLHRIYKGFGLR-----AFIRKQINNIFLRFVYETEHFNGVAEL   | 241 |
| gi | Felis_catus_epsilon            | DYLKTVLHRIYKGFGLR-----AFIRKQINNIFLRFVYETEHFNGVAEL   | 241 |
| gi | Chrysemys_picta_bellii_epsilon | DYLKTVLHRIYKGFGLR-----AFIRKQINNIFLRFVYETEHFNGVAEL   | 241 |
| gi | Xenopus_laevis_epsilon         | DYLKTVLHRIYKGFGLR-----AFIRKQINNIFLRFVYETEHFNGVAEL   | 241 |
| gi | Xenopus_tropicalis_epsilon     | DYLKTVLHRIYKGFGLR-----AFIRKQINNIFLRFVYETEHFNGVAEL   | 241 |
| gi | Alligator_mississippiensis     | DYLKTVLHRIYKGFGLR-----AFIRKQINNIFLRFVYETEHFNGVAEL   | 230 |
| gi | Ambystoma_mexicanum_epsilon    | DYLKTVLHRIYKGFGLR-----AFIRKQINNIFLRFVYETEHFNGVAEL   | 237 |
| gi | Danio_rerio_epsilon            | DCLKTVLHRIYKGFGLR-----AFIRKQINNIFLCFVYETERFNGVAEL   | 241 |
| gi | Mus_musculus_beta              | EYLKTLHRIYKGFGLR-----AYIRKQCNHIFLRFIYELEHFNGVAEL    | 255 |
| gi | Rattus_norvegicus_beta         | EYLKTLHRIYKGFGLR-----AYIRKQCNHIFLRFIYELEHFNGVAEL    | 255 |
| gi | Felis_catus_beta               | EYLKTLHRIYKGFGLR-----AYIRKQCNHIFLRFIYELEHFNGVAEL    | 255 |
| gi | Canis_lupus_familiaris_beta    | EYLKTLHRIYKGFGLR-----AYIRKQCNHIFLRFIYELEHFNGVAEL    | 255 |
| gi | Homo_sapiens_beta              | EYLKTLHRIYKGFGLR-----AYIRKQCNHIFLRFIYELEHFNGVAEL    | 255 |
| gi | Bos_taurus_beta                | EYLKTLHRIYKGFGLR-----AYIRKQCNHIFLRFIYELEHFNGVAEL    | 255 |
| gi | Ovis_aries_beta                | EYLKTLHRIYKGFGLR-----AYIRKQCNHIFLRFIYELEHFNGIAEL    | 255 |
| gi | Macaca_mulatta_beta            | CAKCLSFSWLTGKSLGLRGPTLLALSPPAFLCRFIYELEHFNGVAEL     | 219 |
| gi | Xenopus_laevis_beta            | -----                                               |     |
| gi | Alligator_mississippiensis     | EYLKTLHRIYKGFGLR-----AYIRKQCNHIFLRFIYETEHFNGVAEL    | 255 |
| gi | Chrysemys_picta_bellii_beta    | EYLKTLHRIYKGFGLR-----AYIRKQCNHIFLRFIYETEHFNGVAEL    | 255 |
| gi | Xenopus_tropicalis_beta        | EYLKTLHRIYKGFGLR-----AYIRKQCNHIFLRFIYETERFNGVAEL    | 253 |

Figure S1. Cont.

|     |                             |                                                      |     |
|-----|-----------------------------|------------------------------------------------------|-----|
| gi  | Danio_rerio_beta            | EYLKTTILHRVYGKLLGLR-----AYIRKQINNIFLRFIYETERFNGVAEL  | 254 |
| gi  | Ambystoma_mexicanum_beta    | EYLKTTILHRVYGKFLGLR-----AYIRKQCNNIFLRFVYETEHEFNGVAEL | 124 |
| gi  | Petromyzon_marinus_S4RGA7   | -----VCCRFIYETEHEFNGVAEL                             | 18  |
| gi  | Strongylocentrotus_purpurat | DFLKTTLHRIYGKFLGLR-----AFIRKQINHIPLRFIYETEHEFNGVGL   | 237 |
| gi  | Drosophila_melanogaster_wdb | DFLKTTLHRIYGKFLGLR-----AFIRKQINNIFLRFIYETEHEFNGVGL   | 236 |
| jgi | Branchiostoma_floridiae_237 | DFLKTTLHRIYGKFLGLR-----AFIRKQINHIPLKFIYETEHEFNGVGL   | 192 |
| gi  | Hydra_vulgaris_alpha        | EFLKTTLHRIYGKFLGLR-----AYIRKQINHMFLKFIYETEHEFSGVGL   | 245 |
| jgi | Branchiostoma_floridiae_112 | -----                                                |     |
| jgi | Branchiostoma_floridiae_284 | DLKTTMLHRIYGKFLGLR-----AFIRKQINHIPLKFIYETEHEFNGIGEL  | 205 |
| gi  | Caenorhabditis_elegans_PPTR | DFLKTTLHRIYGKFLGLR-----AFIRKHINNMFLRFVYETDSFNGVGL    | 266 |
| gi  | Amphimedon_queenslandica_be | DYKTTTLHRIYGKFLGLR-----AFIRKHINYIFLRFVYETERFAGIAEL   | 259 |
| gi  | Chrysemys_picta_bellii_gamm | DFLKTTLHRIYGKFLGLR-----AYIRKQINNIFYRFIYETEHHNGIAEL   | 224 |
| gi  | Chrysemys_picta_bellii_delt | DFLKTTLHRIYGKFLGLR-----AYIRKQINNIFYRFIYETEHHNGIAEL   | 149 |
| gi  | Falco_peregrinus_gamma      | DFLKTTLHRIYGKFLGLR-----AYIRKQINNIFYRFIYETEHHNGIAEL   | 224 |
| gi  | Falco_peregrinus_delta/gamm | DFLKTTLHRIYGKFLGLR-----AYIRKQINNIFYRFIYETEHHNGIAEL   | 149 |
| gi  | Gallus_gallus_gamma         | DFLKTTLHRIYGKFLGLR-----AYIRKQINNIFYRFIYETEHHNGIAEL   | 224 |
| gi  | Alligator_mississippiensis_ | DFLKTTLHRIYGKFLGLR-----AYIRKQINNIFYRFIYETEHHNGIAEL   | 224 |
| gi  | Alligator_mississippiensis_ | DFLKTTLHRIYGKFLGLR-----AYIRKQINNIFYRFIYETEHHNGIAEL   | 149 |
| gi  | Ambystoma_mexicanum_gamma   | DFLKTTLHRIYGKFLGLR-----AYIRKQINNIFYRFIYETEHHNGIAEL   | 225 |
| gi  | Mus_musculus_gamma          | DFLKTTLHRIYGKFLGLR-----AYIRKQINNIFYRFIYETEHHNGIAEL   | 224 |
| gi  | Rattus_norvegicus_gamma     | DFLKTTLHRIYGKFLGLR-----AYIRKQINNIFYRFIYETEHHNGIAEL   | 224 |
| gi  | Ovis_aries_gamma            | DFLKTTLHRIYGKFLGLR-----AYIRKQINNIFYRFIYETEHHNGIAEL   | 224 |
| gi  | Bos_taurus_gamma            | DFLKTTLHRIYGKFLGLR-----AYIRKQINNIFYRFIYETEHHNGIAEL   | 224 |
| gi  | Canis_lupus_familiaris_gamm | DFLKTTLHRIYGKFLGLR-----AYIRKQINNIFYRFIYETEHHNGIAEL   | 224 |
| gi  | Macaca_mulatta_gamma        | DFLKTTLHRIYGKFLGLR-----AYIRKQINNIFYRFIYETEHHNGIAEL   | 224 |
| gi  | Homo_sapiens_gamma          | DFLKTTLHRIYGKFLGLR-----AYIRKQINNIFYRFIYETEHHNGIAEL   | 214 |
| gi  | Felis_catus_gamma           | DFLKTTLHRIYGKFLGLR-----AYIRKQINNIFYRFIYETEHHNGIAEL   | 271 |
| gi  | Canis_lupus_familiaris_delt | DFLKTTLHRIYGKFLGLR-----AYIRKQINNIFYRFIYETEHHNGIAEL   | 271 |
| gi  | Macaca_mulatta_delta/gamma  | DFLKTTLHRIYGKFLGLR-----AYIRKQINNIFYRFIYETEHHNGIAEL   | 506 |
| gi  | Bos_taurus_delta/gamma      | DFLKTTLHRIYGKFLGLR-----AYIRKQINNIFYRFIYETEHHNGIAEL   | 278 |
| gi  | Mus_musculus_delta/gamma    | DFLKTTLHRIYGKFLGLR-----AYIRKQINNIFYRFIYETEHHNGIAEL   | 281 |
| gi  | Rattus_norvegicus_delta/gam | DFLKTTLHRIYGKFLGLR-----AYIRKQINNIFYRFIYETEHHNGIAEL   | 347 |
| gi  | Danio_rerio_gamma           | DFLKTTLHRIYGKFLGLR-----AYIRKQINNIFYRFIYETEHHNGIAEL   | 224 |
| gi  | Danio_rerio_delta/gamma     | DFLKTTLHRIYGKFLGLR-----AYIRKQINNIFYRFIYETEHHNGIAEL   | 277 |
| gi  | Xenopus_laevis_delta/gamma  | DFLKTTLHRIYGKFLGLR-----AYIRKQINNIFYRFIYETEHHNGIAEL   | 277 |
| gi  | Xenopus_laevis_gamma        | DFLKTTLHRIYGKFLGLR-----AYIRKQINNIFYRFIYETEHHNGIAEL   | 277 |
| gi  | Xenopus_tropicalis_delta/ga | DFLKTTLHRIYGKFLGLR-----AYIRKQINNIFYRFIYETEHHNGIAEL   | 277 |
| gi  | Mus_musculus_delta          | DFLKTTLHRIYGKFLGLR-----AYIRKQINNIFYRFIYETEHHNGIAEL   | 292 |
| gi  | Rattus_norvegicus_delta     | DFLKTTLHRIYGKFLGLR-----AYIRKQINNIFYRFIYETEHHNGIAEL   | 320 |
| gi  | Felis_catus_delta           | DFLKTTLHRIYGKFLGLR-----AYIRKQINNIFYRFIYETEHHNGIAEL   | 306 |
| gi  | Bos_taurus_delta            | DFLKTTLHRIYGKFLGLR-----AYIRKQINNIFYRFIYETEHHNGIAEL   | 298 |
| gi  | Canis_lupus_familiaris_delt | DFLKTTLHRIYGKFLGLR-----AYIRKQINNIFYRFIYETEHHNGIAEL   | 293 |
| gi  | Macaca_mulatta_delta        | DFLKTTLHRIYGKFLGLR-----AYIRKQINNIFYRFIYETEHHNGIAEL   | 309 |
| gi  | Homo_sapiens_delta          | DFLKTTLHRIYGKFLGLR-----AYIRKQINNIFYRFIYETEHHNGIAEL   | 300 |
| gi  | Ovis_aries_delta            | DFLKTTLHRIYGKFLGLR-----AYIRKQINNIFYRFIYETEHHNGIAEL   | 297 |
| gi  | Falco_peregrinus_delta      | DFLKTTLHRIYGKFLGLR-----AYIRKQINNIFYRFIYETEHHNGIAEL   | 200 |
| gi  | Gallus_gallus_delta         | DFLKTTLHRIYGKFLGLR-----AYIRKQINNIFYRFIYETEHHNGIAEL   | 295 |
| gi  | Alligator_mississippiensis_ | DFLKTTLHRIYGKFLGLR-----AYIRKQINNIFYRFIYETEHHNGIAEL   | 294 |
| gi  | Chrysemys_picta_bellii_delt | DFLKTTLHRIYGKFLGLR-----AYIRKQINNIFYRFIYETEHHNGIAEL   | 296 |
| gi  | Danio_rerio_delta           | DFLKTTLHRIYGKFLGLR-----AYIRKQINNIFYRFIYETEHHNGIAEL   | 287 |
| gi  | Ambystoma_mexicanum_delta   | DFLKTTLHRIYGKFLGLR-----AYIRKQINNIFYRFIYETEHHNGIAEL   | 149 |
| gi  | Petromyzon_marinus_S4RN43   | DFLKTTLHRIYGKFLGLR-----AYIRKQINNIFYRFIYETEHHNGIAEL   | 277 |
| jgi | Branchiostoma_floridiae_237 | DFLKTTLHRIYGKFLGLR-----AYIRKQINNIFYRFIYETEHHNGIAEL   | 197 |
| jgi | Branchiostoma_floridiae_252 | DFLKTTLHRIYGKFLGLR-----AYIRKQINNIFYRFIYETEHHNGIAEL   | 250 |
| gi  | Strongylocentrotus_purpurat | DFLKTTLHRIYGKFLGLR-----AYIRKQINNIFYRFVYETEHHNGIAEL   | 258 |
| gi  | Caenorhabditis_elegans_PPTR | DFLKTTLHRIYGKFLGHR-----AYIRKQINNIFYSFYETERHNGIAEL    | 245 |
| gi  | Hydra_vulgaris_delta        | DFLKTTLHRIYGKFLNLR-----AYIRKQINNIFYRFIYETEHHNGIAEL   | 267 |
| gi  | Amphimedon_queenslandica_de | DFLKTTLHRIYGKFLGLR-----AHIRKQISNIFYRFIYETEKHNGVAEL   | 308 |
| gi  | Drosophila_melanogaster_B56 | DFLKTTLHRIYGKFLGLR-----AFIRKQINNIFYRFIYETEHHNGIAEL   | 381 |
| gi  | Dictyostelium_discoideum_ps | DYKTTTLHRIYGKFLGLR-----GFIRTAIRNLFCFTVYESHQHGISEI    | 306 |
| gi  | Dictyostelium_purpureum_N/A | DYKTTTLHRIYGKFLGLR-----SFIRTAIRNLFCFTVYESHQHGISEI    | 263 |

Figure S1. Cont.

|                                   |                                                      |     |
|-----------------------------------|------------------------------------------------------|-----|
| gi Dictyostelium_fasciculatum     | DYLKTTLHRIYGKFIALR-----GYIRTAIRDLCFTFVYESSQHNGVSEI   | 276 |
| gi Polysphondylium_pallidum_N/    | DYLKTTLHRIYGKFIALR-----GFIRTAIKDLFCFTFVYESYQHNGVSEI  | 254 |
| gi Arabidopsis_thaliana_theta     | DCLKTTLHRIYGKFMVHR-----PFIRKSINNIFYRFVFETEKHNGIAEF   | 271 |
| gi Arabidopsis_thaliana_eta       | DCLKTTLHRIYGKFMVHR-----PFIRKSINNIFYRFVFETEKHNGIAEF   | 292 |
| gi Arabidopsis_thaliana_zeta      | EYLKTLHRIYGKFMVHR-----PYIRKAINNIFYRFIFETEKHNGIAEL    | 301 |
| gi Arabidopsis_thaliana_gamma     | EYLKTLHRIYGKFMVHR-----PFIRKAINNIFYRFIFETEKHNGIAEL    | 280 |
| gi Oryza                          | EYLKMTLHRIYGKFMVYR-----PFIRKAINNIFYQFIYETEKHNGIAEL   | 281 |
| gi Oryza_sativa_zeta              | EYLKTLHRIYGKFMVHR-----PFIRKAINNIFYQFIYETEKHNGIAEL    | 281 |
| gi Oryza_sativa_theta             | EYLKTLHRIYGKFMVHR-----PFIRKAINNIFYRFIFETEKHNGIAEL    | 285 |
| gi Oryza_sativa_eta               | DYLKTLHRIYGKFMVHR-----PFIRKAINNIFYRFIFETEKHNGVael    | 274 |
| gi Arabidopsis_thaliana_delta     | EYLKTLHRIYGRFMVHR-----PFIRKTMNNILYDFIFETGKHSgiaef    | 259 |
| gi Arabidopsis_thaliana_N/A       | ECLKTTLHRIYGKFMVHR-----PFVRKSMSNIFYRFVFETEKHSgiael   | 265 |
| gi Oryza_sativa_kappa             | DCLKTTLHRIYGKFIHR-----PFIRKAVSNIFYHFVFETDRHNGIAEL    | 271 |
| gi Oryza_sativa_N/A               | ECLKTVLHRIYGKFMGMR-----PFIRKAVSNIFYRFVFETDRHNGIAEL   | 252 |
| gi Arabidopsis_thaliana_alpha     | EYLKTLHRIYGKFMVHR-----PFIRKAMNHIFYRFIYETERHSGIGEL    | 270 |
| gi Arabidopsis_thaliana_beta      | EYLKTLHRIYGKFMVHR-----PFIRKAINNIFYRFIYETERHSGIGEL    | 270 |
| gi Oryza_sativa_N/A_2             | EYLKTVLHRIYGKFMVHR-----PFIRKAINNVFYRFIFETERHNGIGEL   | 310 |
| gi Arabidopsis_thaliana_epsilon   | EYLKTVLHRIYGKFIHR-----PFIRCSIYNIFYKFLYETERCIGIGEL    | 279 |
| gi Chlamydomonas_reinhardtii_w    | DYLKTLHRIYGKFMVHR-----PFIRKAINNVFYRFIFETERHNGVael    | 268 |
| gi Schizosaccharomyces_pombe_P    | DFLKTTLHRIYGKFLSLR-----AFIRRSINNLFQLQVYENEQFNgiael   | 303 |
| gi Schizosaccharomyces_pombe_P    | ELLKTTLHRIYGKFLNLR-----SYIRKSMNNVFLQFIYEREKFGHgiael  | 404 |
| gi Ashbya_gossypii_RTS1           | DCLKTTLHRIYGKFLSLR-----SFIRRSINNIFLQFVYETERFNGIAEL   | 366 |
| gi Saccharomyces_cerevisiae_RT    | DCLKTTLHRIYGKFLSLR-----SFIRRSMMNNIFLQFIYETERKNGVael  | 473 |
|                                   |                                                      |     |
| gi Aspergillus_niger_N/A          | LEILGSIINGFALPLKEEHKLFTRVLLPLHKVKSLSMYHPQLAYCIVQF    | 407 |
| gi Aspergillus_nidulans_para      | LEILGSIINGFALPLKEEHKLFTRVLLPLHKVKSLSMYHPQLAYCIVQF    | 409 |
| gi Mus_musculus_alpha             | LEILGSIINGFALPLKAEHKQFLMKVLIPMHTAKGLALFHAQLAYCIVVQF  | 299 |
| gi Rattus_norvegicus_alpha        | LEILGSIINGFALPLKAEHKQFLMKVLIPMHTAKGLALFHAQLAYCIVVQF  | 299 |
| gi Macaca_mulatta_alpha           | LEILGSIINGFALPLKAEHKQFLMKVLIPMHTAKGLALFHAQLAYCIVVQF  | 299 |
| gi Homo_sapiens_alpha             | LEILGSIINGFALPLKAEHKQFLMKVLIPMHTAKGLALFHAQLAYCIVVQF  | 299 |
| gi Ovis_aries_alpha               | LEILGSIINGFALPLKAEHKQFLMKVLIPMHTAKGLALFHAQLAYCIVVQF  | 302 |
| gi Bos_taurus_alpha               | LEILGSIINGFALPLKAEHKQFLMKVLIPMHTAKGLALFHAQLAYCIVVQF  | 302 |
| gi Felis_catus_alpha              | LEILGSIINGFALPLKAEHKQFLMKVLIPMHTAKGLALFHAQLAYCIVVQF  | 215 |
| gi Canis_lupus_familiaris_alph    | LEILGSIINGFALPLKAEHKQFLMKVLIPMHTAKGLALFHAQLAYCIVVQF  | 215 |
| gi Falco_peregrinus_alpha         | LEILGSIINGFALPLKAEHKQFLMKVLIPMHTAKGLALFHAQLAYCIVVQF  | 289 |
| gi Gallus_gallus_alpha            | LEILGSIINGFALPLKAEHKQFLMKVLIPMHTAKGLALFHAQLAYCIVVQF  | 289 |
| gi Alligator_mississippiensis     | LEILGSIINGFALPLKAEHKQFLMKVLIPMHTAKGLALFHAQLAYCIVVQF  | 299 |
| gi Chrysemys_picta_bellii_alph    | LEILGSIINGFALPLKAEHKQFLMKVLIPMHTAKGLALFHAQLAYCIVVQF  | 289 |
| gi Xenopus_laevis_alpha           | LEILGSIINGFALPLKSEHKQFLMKVLIPMHTAKGLALFHAQLAYCIVVQF  | 288 |
| gi Xenopus_tropicalis_alpha       | LEILGSIINGFALPLKAEHKQFLMKVLIPMHTAKGLALFHAQLAYCIVVQF  | 288 |
| gi Ambystoma_mexicanum_alpha      | LEILGSIINGFALPLKAEHKQFLMKVLIPMHTAKGLALFHAQLAYCIVVQF  | 215 |
| gi Danio_rerio_alpha              | LEILGSIINGFALPLKAEHKQFLMKLIPLHTAKPLALFHAQLAYCIVVQF   | 291 |
| gi Petromyzon_marinus_S4RHV1      | LEILGSIINGFALPLKTEHKQFLVVRVLLPLHTARGLSIFHAQLAYCIVMLF | 289 |
| gi Mus_musculus_epsilon           | LEILGSIINGFALPLKAEHKQFLVKVLIPLHTVRSLSLFAQLAYCIVQF    | 291 |
| gi Rattus_norvegicus_epsilon      | LEILGSIINGFALPLKAEHKQFLVKVLIPLHTVRSLSLFAQLAYCIVQF    | 291 |
| gi Macaca_mulatta_epsilon         | LEILGSIINGFALPLKAEHKQFLVKVLIPLHTVRSLSLFAQLAYCIVQF    | 291 |
| gi Homo_sapiens_epsilon           | LEILGSIINGFALPLKAEHKQFLVKVLIPLHTVRSLSLFAQLAYCIVQF    | 291 |
| gi Ovis_aries_epsilon             | LEILGSIINGFALPLKAEHKQFLVKVLIPLHTVRSLSLFAQLAYCIVQF    | 291 |
| gi Bos_taurus_epsilon             | LEILGSIINGFALPLKAEHKQFLVKVLIPLHTVRSLSLFAQLAYCIVQF    | 291 |
| gi Canis_lupus_familiaris_epsilon | LEILGSIINGFALPLKAEHKQFLVKVLIPLHTVRSLSLFAQLAYCIVQF    | 291 |
| gi Falco_peregrinus_epsilon       | LEILGSIINGFALPLKAEHKQFLVKVLIPLHTVRSLSLFAQLAYCIVQF    | 291 |
| gi Gallus_gallus_epsilon          | LEILGSIINGFALPLKAEHKQFLVKVLIPLHTVRSLSLFAQLAYCIVQF    | 291 |
| gi Felis_catus_epsilon            | LEILGSIINGFALPLKAEHKQFLVKVLIPLHTVRSLSLFAQLAYCIVQF    | 291 |
| gi Chrysemys_picta_bellii_epsilon | LEILGSIINGFALPLKAEHKQFLVKVLIPLHTVRSLSLFAQLAYCIVQF    | 291 |
| gi Xenopus_laevis_epsilon         | LEILGSIINGFALPLKAEHKQFLVKVLIPLHTVRSLSLFAQLAYCIVQF    | 291 |
| gi Xenopus_tropicalis_epsilon     | LEILGSIINGFALPLKAEHKQFLVKVLIPLHTVRSLSLFAQLAYCIVQF    | 291 |
| gi Alligator_mississippiensis     | LEILGSIINGFALPLKAEHKQFLVKVLIPLHTVRSLSLFAQLAYCIVQF    | 280 |
| gi Ambystoma_mexicanum_epsilon    | LEILGSIINGFALPLKAEHKQFLVKVLIPLHTVRSLSLFAQLAYCIVQF    | 287 |
| gi Danio_rerio_epsilon            | LEILGSIINGFALPLKAEHKQFLVKVLLPLHTVRSLSLFAQLAYCIVQF    | 291 |
| gi Mus_musculus_beta              | LEILGSIINGFALPLKTEHKQFLVVRVLIPLHSVKSLSVFHAQLAYCIVVQF | 305 |

Figure S1. Cont.

|                                 |                                                     |     |
|---------------------------------|-----------------------------------------------------|-----|
| gi Rattus_norvegicus_beta       | LEILGSIINGFALPLKTEHKQFLVRVLIPLHSVKSLSVFHAQLAYCVVQF  | 305 |
| gi Felis_catus_beta             | LEILGSIINGFALPLKTEHKQFLVRVLIPLHSVKSLSVFHAQLAYCVVQF  | 305 |
| gi Canis_lupus_familiaris_beta  | LEILGSIINGFALPLKTEHKQFLVRVLIPLHSVKSLSVFHAQLAYCVVQF  | 305 |
| gi Homo_sapiens_beta            | LEILGSIINGFALPLKTEHKQFLVRVLIPLHSVKSLSVFHAQLAYCVVQF  | 305 |
| gi Bos_taurus_beta              | LEILGSIINGFALPLKTEHKQFLVRVLIPLHSVKSLSVFHAQLAYCVVQF  | 305 |
| gi Ovis_aries_beta              | LEILGSIINGFALPLKTEHKQFLVRVLIPLHSVKSLSVFHAQLAYCVVQF  | 305 |
| gi Macaca_mulatta_beta          | LEILGSIINGFALPLKTEHKQFLVRVLIPLHSVKSLSVFHAQLAYCVVQF  | 269 |
| gi Xenopus_laevis_beta          | -----                                               |     |
| gi Alligator_mississippiensis   | LEILGSIINGFALPLXAEHKQFLVRVLIPLHSVKALSVFHAQLAYCVVQF  | 305 |
| gi Chrysemys_picta_bellii_beta  | LEILGSIINGFALPLKTEHKHFLVRVLIPLHSVKSLSIFHAQLAYCVVQF  | 305 |
| gi Xenopus_tropicalis_beta      | LEILGSIINGFALPLKSEHKQFLVRVLIPLHSAKSLSIFHAQLAYCAVQF  | 303 |
| gi Danio_rerio_beta             | LEILGSIINGFALPLKSEHKQFLVRVLIPLHTAKSLSIFHAQLAYCVVQF  | 304 |
| gi Ambystoma_mexicanum_beta     | LEILGSIINGFALPLKAEHKQFLVRVLLPLHSVKSLSIFHAQLAYCVVQF  | 174 |
| gi Petromyzon_marinus_S4RGA7    | LEILGSIINGFAMPLKSEHKQFLVKVLLPLHTVKVLSLFAQLAYCVVQF   | 68  |
| gi Strongylocentrotus_purpurat  | LEILGSIINGFALPLKTEHKQFLIKVLIPLHKVKCLGLYHAQLAYCVVQF  | 287 |
| gi Drosophila_melanogaster_wdb  | LEILGSIINGFALPLKAEHKQFLVKVLLPLHKVKCLSLYHAQLAYCIVQF  | 286 |
| jgi Branchiostoma_floridiae_237 | LEILGSIINGFALPLKAEHKQFLIKVLIPLHKAKSLSLYHAQLAYCVVQF  | 242 |
| gi Hydra_vulgaris_alpha         | LEILGSIINGFALPLKAEHKQFLKVLVLIPLHKARCLSLYHAQLAYCVVQF | 295 |
| jgi Branchiostoma_floridiae_112 | -----                                               |     |
| jgi Branchiostoma_floridiae_284 | LEILGSIINGFALPLKAEHKQFLKVLVLIPLHKAKSLAQYHAQLAYCVVQF | 255 |
| gi Caenorhabditis_elegans_PPTR  | LEILGSIINGFALPLKQEHKQFLVKVLLPLHKPKCLSLYHAQLAYCVVQF  | 316 |
| gi Amphimedon_queenslandica_be  | LEILGSIINGFALPLKVEHKQFLIRVLLPLHKAKSLAQYQAQLAYCVVQF  | 309 |
| gi Chrysemys_picta_bellii_gamm  | LEILGSIINGFALPLKKEHKIFLLKVLLPLHKVKSLSVYHPQLAYCVVQF  | 274 |
| gi Chrysemys_picta_bellii_delt  | LEILGSIINGFALPLKKEHKIFLLKVLLPLHKVKSLSVYHPQLAYCVVQF  | 199 |
| gi Falco_peregrinus_gamma       | LEILGSIINGFALPLKKEHKIFLLKVLLPLHKVKSLSVYHPQLAYCVVQF  | 274 |
| gi Falco_peregrinus_delta/gamm  | LEILGSIINGFALPLKKEHKIFLLKVLLPLHKVKSLSVYHPQLAYCVVQF  | 199 |
| gi Gallus_gallus_gamma          | LEILGSIINGFALPLKKEHKIFLLKVLLPLHKVKSLSVYHPQLAYCVVQF  | 274 |
| gi Alligator_mississippiensis   | LEILGSIINGFALPLKKEHKIFLLKVLLPLHKVKSLSVYHPQLAYCVVQF  | 274 |
| gi Alligator_mississippiensis   | LEILGSIINGFALPLKKEHKIFLLKVLLPLHKVKSLSVYHPQLAYCVVQF  | 199 |
| gi Ambystoma_mexicanum_gamma    | LEILGSIINGFALPLKKEHKIFLLKVLLPLHKVKSLSVYHPQLAYCVVQF  | 275 |
| gi Mus_musculus_gamma           | LEILGSIINGFALPLKKEHKIFLLKVLLPLHKVKSLSVYHPQLAYCVVQF  | 274 |
| gi Rattus_norvegicus_gamma      | LEILGSIINGFALPLKKEHKIFLLKVLLPLHKVKSLSVYHPQLAYCVVQF  | 274 |
| gi Ovis_aries_gamma             | LEILGSIINGFALPLKKEHKIFLLKVLLPLHKVKSLSVYHPQLAYCVVQF  | 274 |
| gi Bos_taurus_gamma             | LEILGSIINGFALPLKKEHKIFLLKVLLPLHKVKSLSVYHPQLAYCVVQF  | 274 |
| gi Canis_lupus_familiaris_gamm  | LEILGSIINGFALPLKKEHKIFLLKVLLPLHKVKSLSVYHPQLAYCVVQF  | 274 |
| gi Macaca_mulatta_gamma         | LEILGSIINGFALPLKKEHKIFLLKVLLPLHKVKSLSVYHPQLAYCVVQF  | 274 |
| gi Homo_sapiens_gamma           | LEILGSIINGFALPLKKEHKIFLLKVLLPLHKVKSLSVYHPQLAYCVVQF  | 264 |
| gi Felis_catus_gamma            | LEILGSIINGFALPLKKEHKIFLLKVLLPLHKVKSLSVYHPQLAYCVVQF  | 321 |
| gi Canis_lupus_familiaris_delt  | LEILGSIINGFALPLKKEHKIFLLKVLLPLHKVKSLSVYHPQLAYCVVQF  | 321 |
| gi Macaca_mulatta_delta/gamma   | LEILGSIINGFALPLKKEHKIFLLKVLLPLHKVKSLSVYHPQLAYCVVQF  | 556 |
| gi Bos_taurus_delta/gamma       | LEILGSIINGFALPLKKEHKIFLLKVLLPLHKVKSLSVYHPQLAYCVVQF  | 328 |
| gi Mus_musculus_delta/gamma     | LEILGSIINGFALPLKKEHKIFLLKVLLPLHKVKSLSVYHPQLAYCVVQF  | 331 |
| gi Rattus_norvegicus_delta/gam  | LEILGSIINGFALPLKKEHKIFLLKVLLPLHKVKSLSVYHPQLAYCVVQF  | 397 |
| gi Danio_rerio_gamma            | LEILGSIINGFALPLKKEHKIFLLKVLLPLHKVKSLSVYHPQLAYCVVQF  | 274 |
| gi Danio_rerio_delta/gamma      | LEILGSIINGFALPLKKEHKIFLLKVLLPLHKVKSLSVYHPQLAYCVVQF  | 327 |
| gi Xenopus_laevis_delta/gamma   | LEILGSIINGFALPLKKEHKIFLLKVLLPLHKVKSLSVYHPQLAYCVVQF  | 327 |
| gi Xenopus_laevis_gamma         | LEILGSIINGFALPLKKEHKIFLLKVLLPLHKVKSLSVYHPQLAYCVVQF  | 327 |
| gi Xenopus_tropicalis_delta/ga  | LEILGSIINGFALPLKKEHKIFLLKVLLPLHKVKSLSVYHPQLAYCVVQF  | 327 |
| gi Mus_musculus_delta           | LEILGSIINGFALPLKKEHKVFLVRVLLPLHKVKSLSVYHPQLAYCVVQF  | 342 |
| gi Rattus_norvegicus_delta      | LEILGSIINGFALPLKKEHKMFLIRVLLPLHKVKSLSVYHPQLAYCVVQF  | 370 |
| gi Felis_catus_delta            | LEILGSIINGFALPLKKEHKMFLIRVLLPLHKVKSLSVYHPQLAYCVVQF  | 356 |
| gi Bos_taurus_delta             | LEILGSIINGFALPLKKEHKMFLIRVLLPLHKVKSLSVYHPQLAYCVVQF  | 348 |
| gi Canis_lupus_familiaris_delt  | LEILGSIINGFALPLKKEHKMFLIRVLLPLHKVKSLSVYHPQLAYCVVQF  | 343 |
| gi Macaca_mulatta_delta         | LEILGSIINGFALPLKKEHKMFLIRVLLPLHKVKSLSVYHPQLAYCVVQF  | 359 |
| gi Homo_sapiens_delta           | LEILGSIINGFALPLKKEHKMFLIRVLLPLHKVKSLSVYHPQLAYCVVQF  | 350 |
| gi Ovis_aries_delta             | LEILGSIINGFALPLKKEHKMFLIRVLLPLHKVKSLSVYHPQLAYCVVQF  | 347 |
| gi Falco_peregrinus_delta       | LEILGSIINGFALPLKKEHKMFLIRVLLPLHKVKSLSVYHPQLAYCVVQF  | 250 |
| gi Gallus_gallus_delta          | LEILGSIINGFALPLKKEHKMFLIRVLLPLHKVKSLSVYHPQLAYCVVQF  | 345 |
| gi Alligator_mississippiensis   | LEILGSIINGFALPLKKEHKMFLIRVLLPLHKVKSLSVYHPQLAYCVVQF  | 344 |
| gi Chrysemys_picta_bellii_delt  | LEILGSIINGFALPLKKEHKMFLIRVLLPLHKVKSLSVYHPQLAYCVVQF  | 346 |
| gi Danio_rerio_delta            | LEILGSIINGFALPLKKEHKMFLIRVLLPLHKVKSLSVYHPQLAYCVVQF  | 337 |

Figure S1. Cont.

|                                 |                                                      |     |
|---------------------------------|------------------------------------------------------|-----|
| gi Ambystoma_mexicanum_delta    | LEILGSIINGFALPLKEEHKMFLLIRVLLPLHKVKSLSVYHPQLAYCVVQF  | 199 |
| gi Petromyzon_marinus_S4RN43    | LEILGSIINGFALPLKEEHKVFLLKVLPLPHKVKSLSVYHPQLAYCVVQF   | 327 |
| jgi Branchiostoma_floridae_237  | LEVLGSIINGFALPLKEEHKVFLLKVLPLPHKVKSLSVYHPQLAYCVVQF   | 247 |
| jgi Branchiostoma_floridae_252  | LEVLGSIINGFALPLKEEHKVFLLKVLPLPHKVKSLSVYHPQLAYCVVQF   | 300 |
| gi Strongylocentrotus_purpurat  | LEILGSIINGFALPLKEEHTFLLKVLMLPHKAKSLSVYHPQLAYCVVQF    | 308 |
| gi Caenorhabditis_elegans_PPTR  | LEILGSIINGFALPLKEEHTFLLRVLLPLHKVKSLSVYHPQLAYCVVQF    | 295 |
| gi Hydra_vulgaris_delta         | LEVLGSIINGFALPLKEEHKMFLLKVLPLPHKVKALSMHHPQLAYCVVQF   | 317 |
| gi Amphimedon_queenslandica_de  | LEILGSIINGFALPLKEEHKMFLLRVLIPLHKVKSLSCYHPQLAYCVVQF   | 358 |
| gi Drosophila_melanogaster_B56  | LEILGSIINGFALPLKEEHKQFLLKVLPLPHKAKSLSVYHPQLTYCVVQF   | 431 |
| gi Dictyostelium_discoideum_ps  | LEVLGSIINGFALPLKDEHKQFLIKVLIPLHKPKSYSVYCSHLGYCMSQF   | 356 |
| gi Dictyostelium_purpureum_N/A  | LEVLGSIINGFVPLKDEHKQFLIKVLIPLHKPKSYSVYCSHLGYCMTQF    | 313 |
| gi Dictyostelium_fasciculatum   | LEVLGSIINGFALPLKDEHKQFLTKVLLPLHKPKSYSIYCSQLGYCISQF   | 326 |
| gi Polysphondylium_pallidum_N/  | LEVLGSIINGFVPLKDEHKQFLVKVLLPLHKPKSYSVYCSHLGYCITQF    | 304 |
| gi Arabidopsis_thaliana_theta   | LEILGSIINGFALPLKDEHKVFLVRLVPLHKPKSLQMYHQQLSYCITQF    | 321 |
| gi Arabidopsis_thaliana_eta     | LEILGSIINGFALPLKDEHK-----F                           | 313 |
| gi Arabidopsis_thaliana_zeta    | LEILGSIINGFALPLKEEHLFLLRALIPLHKPKCSSVYHQQLSYCIVQF    | 351 |
| gi Arabidopsis_thaliana_gamma   | LEILGSIINGFALPLKEEHLFLLRALIPLHRPKCASAYHQQLSYCIVQF    | 330 |
| gi>Oryza                        | LEILGSIINGFALPLKEEHLFLLVRLIPLHKPKCIALYHQQLSYCITQF    | 331 |
| gi>Oryza_sativa_zeta            | LEILGSIINGFALPLKEEHLFLLVRLIPLHKPKCIGMYHQQLSYCITQF    | 331 |
| gi>Oryza_sativa_theta           | LEILGSIINGFALPLKEEHLFLLVRLIPLHKPKCVSMYHQQLSYCIVTQF   | 335 |
| gi>Oryza_sativa_eta             | LEILGSIINGFALPLKEEHLFLLVRLIPLHKPKCVSMYHQQLSYCITQF    | 324 |
| gi Arabidopsis_thaliana_delta   | LEVLGSIINGFALPLKEEHLFLLTRVLIPLHKLKCLPNYHQQLSYCIVQF   | 309 |
| gi Arabidopsis_thaliana_N/A     | LEIFGSIINGFALPLKEEHLFLLSRALIPLHKPKSVGNYHQQLSYCITQF   | 315 |
| gi>Oryza_sativa_kappa           | LEVFGSVISGFALPLKEEHLFLLVRLVPLHKPKSVGVYHQQLTYCVTQF    | 321 |
| gi>Oryza_sativa_N/A             | LEVFGSVISGFALPLKEEHLFLLWKALVPLHKPKTVGVYLPQLTYCIIQF   | 302 |
| gi Arabidopsis_thaliana_alpha   | LEILGSIINGFALPMKEEHLFLLIRALIPLHKPKPIAMYHQQLSYCIVQF   | 320 |
| gi Arabidopsis_thaliana_beta    | LEILGSIINGFALPMKEEHLFLLIRVLIPLHKPKPIVYHQQLSYCIVQF    | 320 |
| gi>Oryza_sativa_N/A_2           | LEILGSIINGFALPMKEEHLFLLSRALIPLHKPKSVAIYHQQLSYCIVQF   | 360 |
| gi Arabidopsis_thaliana_epsilon | LEILGSIINGFALPMKEEHLFLLVRLVPLHKPKSGISYHQQLAYCVTQF    | 329 |
| gi Chlamydomonas_reinhardtii_w  | LEILGSIINGFALPLKEEHLFLLQRLMPLHKPKCVAMYHQQLAYCVTQF    | 318 |
| gi Schizosaccharomyces_pombe_P  | LEILGSIINGFALPLKEEHLFLLSRVLIPLHKAKSLPLYYPQIAYGIVQF   | 353 |
| gi Schizosaccharomyces_pombe_P  | LEILGSIINGFALPLKEEHLFLLSKVLIPLHQTKSVFLYHPQLTYCIVQF   | 454 |
| gi Ashbya_gossypii_RTS1         | LEILGSIINGFALPLKEEHLFLLVRLIPLHKVKRCLSLYHPQLAYCIVQF   | 416 |
| gi Saccharomyces_cerevisiae_RT  | LEILGSIINGFALPLKEEHLFLLVRLIPLHKVKRCLSLYHPQLAYCIVQF   | 523 |
|                                 |                                                      |     |
| gi Aspergillus_niger_N/A        | LEKDSSTLTEDVVLGLLRYWPKTNSTKEVMYLNVEDIFEVMDPAE-FAKV   | 456 |
| gi Aspergillus_nidulans_para    | LEKDSSTLTEDVVLGLLRYWPKTNSTKEVMFLNEVEDIFEVMDPAE-FAKV  | 458 |
| gi Mus_musculus_alpha           | LEKDTTLTEPVIRGLLKFWPKTCSQKEVMFLGEIEEILDVIEPTQ-FKKI   | 348 |
| gi Rattus_norvegicus_alpha      | LEKDTTLTEPVIRGLLKFWPKTCSQKEVMFLGEIEEILDVIEPTQ-FKKI   | 348 |
| gi Macaca_mulatta_alpha         | LEKDTTLTEPVIRGLLKFWPKTCSQKEVMFLGEIEEILDVIEPTQ-FKKI   | 348 |
| gi Homo_sapiens_alpha           | LEKDTTLTEPVIRGLLKFWPKTCSQKEVMFLGEIEEILDVIEPTQ-FKKI   | 348 |
| gi Ovis_aries_alpha             | LEKDTTLTEPVIRGLLKFWPKTCSQKEVMFLGEIEEILDVIEPTQ-FKKI   | 351 |
| gi Bos_taurus_alpha             | LEKDTTLTEPVIRGLLKFWPKTCSQKEVMFLGEIEEILDVIEPTQ-FKKI   | 351 |
| gi Felis_catus_alpha            | LEKDTTLTEPVIRGLLKFWPKTCSQKEVMFLGEIEEILDVIEPTQ-FKKI   | 264 |
| gi Canis_lupus_familiaris_alph  | LEKDTTLTEPVIRGLLKFWPKTCSQKEVMFLGEIEEILDVIEPTQ-FKKI   | 264 |
| gi Falco_peregrinus_alpha       | LEKDTTLTEPVIRGLLKFWPKTCSQKEVMFLGEIEEILDVIEPTQ-FKKI   | 338 |
| gi Gallus_gallus_alpha          | LEKDTTLTEPVIRGLLKFWPKTCSQKEVMFLGEIEEILDVIEPTQ-FKKI   | 338 |
| gi Alligator_mississippiensis   | LEKETTLTEPVIRGLLKFWPKTCSQKEVMFLGEIEEILDVIEPTQ-FKKI   | 348 |
| gi Chrysemys_picta_bellii_alph  | LEKDTTLTEPVIRGLLKFWPKTCSQKEVMFLGEIEEILDVIEPTQ-FKKI   | 338 |
| gi Xenopus_laevis_alpha         | MEKDTTLTEPVIRGLLKFWPKTCSQKEVMFLGEIEEILDVIEPTQ-FKKI   | 337 |
| gi Xenopus_tropicalis_alpha     | LEKDTTLTDPVIRGLLKFWPKTCSQKEVMYLGIEEILDVIEPTQ-FKKI    | 337 |
| gi Ambystoma_mexicanum_alpha    | LEKDTTLTEPVIRGLLKFWPKTCSQKEVMYLGIEEILDVIEPTQ-FKKI    | 264 |
| gi Danio_rerio_alpha            | LEKDP TLTEVVVIRGLLKFWPKTCSQKEVMFLGEIEEILDVIEPTQ-FKKI | 340 |
| gi Petromyzon_marinus_S4RHV1    | LEKDATLAEIVRGLLKFWPKTCSQKEVMFLGEVEEVLVIEPTQ-FVKI     | 338 |
| gi Mus_musculus_epsilon         | LEKDP SLTEPVIRGLMKFWPKTCSQKEVMFLGELEEILDVIEPSQ-FVKI  | 340 |
| gi Rattus_norvegicus_epsilon    | LEKDP SLTEPVIRGLMKFWPKTCSQKEVMFLGELEEILDVIEPSQ-FVKI  | 340 |
| gi Macaca_mulatta_epsilon       | LEKDP SLTEPVIRGLMKFWPKTCSQKEVMFLGELEEILDVIEPSQ-FVKI  | 340 |
| gi Homo_sapiens_epsilon         | LEKDP SLTEPVIRGLMKFWPKTCSQKEVMFLGELEEILDVIEPSQ-FVKI  | 340 |
| gi Ovis_aries_epsilon           | LEKDP SLTEPVIRGLMKFWPKTCSQKEVMFLGELEEILDVIEPSQ-FVKI  | 340 |
| gi Bos_taurus_epsilon           | LEKDP SLTEPVIRGLMKFWPKTCSQKEVMFLGELEEILDVIEPSQ-FVKI  | 340 |

Figure S1. Cont.

|     |                                    |                                                     |     |
|-----|------------------------------------|-----------------------------------------------------|-----|
| gi  | Canis_lupus_familiaris_epsilon     | LEKDPSTLTPVIRGLMKFWPKTCSQKEVMFLGELEEILDVIEPSQ-FVKI  | 340 |
| gi  | Falco_peregrinus_epsilon           | LEKDPSTLTPVIRGLMKFWPKTCSQKEVMFLGELEEILDVIEPSQ-FVKI  | 340 |
| gi  | Gallus_gallus_epsilon              | LEKDPSTLTPVIRGLMKFWPKTCSQKEVMFLGELEEILDVIEPSQ-FVKI  | 340 |
| gi  | Felis_catus_epsilon                | LEKDPSTLTPVIRGLMKFWPKTCSQKEVMFLGELEEILDVIEPSQ-FVKI  | 340 |
| gi  | Chrysemys_picta_bellii_epsilon     | LEKDPSTLTPVIRGLMKFWPKTCSQKEVMFLGELEEILDVIEPSQ-FVKI  | 340 |
| gi  | Xenopus_laevis_epsilon             | LEKDPSTLTPVIRGLMKFWPKTCSQKEVMFLGELEEILDVIEPSQ-FVKI  | 340 |
| gi  | Xenopus_tropicalis_epsilon         | LEKDPSTLTPVIRGLMKFWPKTCSQKEVMFLGELEEILDVIEPSQ-FVKI  | 340 |
| gi  | Alligator_mississippiensis_epsilon | LEKDPSTLTPVIRGLMKFWPKTCSQKEVMFLGELEEILDVIEPSQ-FVKI  | 329 |
| gi  | Ambystoma_mexicanum_epsilon        | LEKDPSTLTPVIRGLMKFWPKTCSQKEVMFLGELEEILDVIEPTQ-FVKI  | 336 |
| gi  | Danio_rerio_epsilon                | LEKDPSTLTPVIRGLMKFWPKTCSQKEVMFLGELEEILDVIEPTQ-FVKI  | 340 |
| gi  | Mus_musculus_beta                  | LEKDATLTHEVIRGLLKYWPKTCTQKEVMFLGEMEEILDVIEPSQ-FVKI  | 354 |
| gi  | Rattus_norvegicus_beta             | LEKDATLTHEVIRGLLKYWPKTCTQKEVMFLGEMEEILDVIEPSQ-FVKI  | 354 |
| gi  | Felis_catus_beta                   | LEKDATLTHEVIRGLLKYWPKTCTQKEVMFLGEMEEILDVIEPSQ-FVKI  | 354 |
| gi  | Canis_lupus_familiaris_beta        | LEKDATLTHEVIRGLLKYWPKTCTQKEVMFLGEMEEILDVIEPSQ-FVKI  | 354 |
| gi  | Homo_sapiens_beta                  | LEKDATLTHEVIRGLLKYWPKTCTQKEVMFLGEMEEILDVIEPSQ-FVKI  | 354 |
| gi  | Bos_taurus_beta                    | LEKDATLTHEVIRGLLKYWPKTCTQKEVMFLGEMEEILDVIEPSQ-FVKI  | 354 |
| gi  | Ovis_aries_beta                    | LEKDATLTHEVIRGLLKYWPKTCTQKEVMFLGEMEEILDVIEPSQ-FVKI  | 354 |
| gi  | Macaca_mulatta_beta                | LEKDATLTHEVIRGLLKYWPKTCTQKEVMFLGEMEEILDVIEPSQ-FVKI  | 318 |
| gi  | Xenopus_laevis_beta                | -----                                               |     |
| gi  | Alligator_mississippiensis_beta    | LEKDATLTHEVIRGLLKYWPKTCTQKEVMFLGEIEEILDVIEPSQ-FVKV  | 354 |
| gi  | Chrysemys_picta_bellii_beta        | LEKDATLTHEVIRGLLKYWPKTCTQKEVMFLGEIEEILDVIEPSQ-FVKV  | 354 |
| gi  | Xenopus_tropicalis_beta            | LEKDSSTLTHEVIRGLLKYWPKTCTQKEVMFLGEIEEILDVIEPSQ-FVKI | 352 |
| gi  | Danio_rerio_beta                   | MEKDATVTEHIIRGLLRYWPKTCTQKEVMFLGEIEEILDVIEPSQ-FIRV  | 353 |
| gi  | Ambystoma_mexicanum_beta           | LEKDATLTHEVIRGLLKYWPKTCTQKEVMFLGEIEEILDVIEPSQ-FIKI  | 223 |
| gi  | Petromyzon_marinus_S4RGA7          | LEKDPQLTEPVIRALLKFWPKTCSQKEVMFLGEIEEILDVIESNQ-FVKI  | 117 |
| gi  | Strongylocentrotus_purpurat        | LEKDAALTEQVVGGLLKFWPKTCSAKEVMFLGEIEEILDVIEPSQ-FVKI  | 336 |
| gi  | Drosophila_melanogaster_wdb        | LEKDPFLTEPVVRGLLKFWPKTCSQKEVMFLGEIEEILDVIDPPQ-FVKI  | 335 |
| jgi | Branchiostoma_floridiae_237        | LEKDATLTEPVVRGLLKFWPKTCSQKEVMFLGEIEEILDVIEPSQ-FVRI  | 291 |
| gi  | Hydra_vulgaris_alpha               | LEKDSSTLTPVIMGLLKYWPKTCSQKEVMFLGEIEEILDAIEASQ-FQKV  | 344 |
| jgi | Branchiostoma_floridiae_112        | -----                                               |     |
| jgi | Branchiostoma_floridiae_284        | LEKDATLTEPVVRGLLKFWPKTCSQKEVMFLGEIEEILDVIEPSQ-FVRI  | 304 |
| gi  | Caenorhabditis_elegans_PPTR        | IEKDSSTLTPQVFEALLKFWPRTCSSEVMFLGEVEEILDIIEPEQ-FKKI  | 365 |
| gi  | Amphimedon_queenslandica_be        | LEKDAALTEQVLHGLFKFWPKTNSSEVMFLGEIEEILDIIDAPQ-FVTI   | 358 |
| gi  | Chrysemys_picta_bellii_gamm        | LEKDSSTLTPVVMALLKYWPKTHSPKEVMFLNELEEILDVIEPSE-FVKV  | 323 |
| gi  | Chrysemys_picta_bellii_delt        | LEKDSSTLTPVVMALLKYWPKTHSPKEVMFLNELEEILDVIEPSE-FVKV  | 248 |
| gi  | Falco_peregrinus_gamma             | LEKDSSTLTPVVMALLKYWPKTHSPKEVMFLNELEEILDVIEPSE-FVKV  | 323 |
| gi  | Falco_peregrinus_delta/gamm        | LEKDSSTLTPVVMALLKYWPKTHSPKEVMFLNELEEILDVIEPSE-FVKV  | 248 |
| gi  | Gallus_gallus_gamma                | LEKDSSTLTPVVMALLKYWPKTHSPKEVMFLNELEEILDVIEPSE-FVKV  | 323 |
| gi  | Alligator_mississippiensis_gamma   | LEKDSSTLTPVVMALLKYWPKTHSPKEVMFLNELEEILDVIEPSE-FVKV  | 323 |
| gi  | Alligator_mississippiensis_gamma   | LEKDSSTLTPVVMALLKYWPKTHSPKEVMFLNELEEILDVIEPSE-FVKV  | 248 |
| gi  | Ambystoma_mexicanum_gamma          | LEKDSSTLTPVVMALLKYWPKTHSPKEVMFLNELEEILDVIEPSE-FVKV  | 324 |
| gi  | Mus_musculus_gamma                 | LEKDSSTLTPVVMALLKYWPKTHSPKEVMFLNELEEILDVIEPSE-FVKI  | 323 |
| gi  | Rattus_norvegicus_gamma            | LEKDSSTLTPVVMALLKYWPKTHSPKEVMFLNELEEILDVIEPSE-FVKI  | 323 |
| gi  | Ovis_aries_gamma                   | LEKDSSTLTPVVMALLKYWPKTHSPKEVMFLNELEEILDVIEPSE-FVKI  | 323 |
| gi  | Bos_taurus_gamma                   | LEKDSSTLTPVVMALLKYWPKTHSPKEVMFLNELEEILDVIEPSE-FVKI  | 323 |
| gi  | Canis_lupus_familiaris_gamm        | LEKDSSTLTPVVMALLKYWPKTHSPKEVMFLNELEEILDVIEPSE-FVKI  | 323 |
| gi  | Macaca_mulatta_gamma               | LEKDSSTLTPVVMALLKYWPKTHSPKEVMFLNELEEILDVIEPSE-FVKI  | 323 |
| gi  | Homo_sapiens_gamma                 | LEKDSSTLTPVVMALLKYWPKTHSPKEVMFLNELEEILDVIEPSE-FVKI  | 313 |
| gi  | Felis_catus_gamma                  | LEKDSSTLTPVVMALLKYWPKTHSPKEVMFLNELEEILDVIEPSE-FVKV  | 370 |
| gi  | Canis_lupus_familiaris_delt        | LEKDSSTLTPVVMALLKYWPKTHSPKEVMFLNELEEILDVIEPSE-FVKI  | 370 |
| gi  | Macaca_mulatta_delta/gamma         | LEKDSSTLTPVVMALLKYWPKTHSPKEVMFLNELEEILDVIEPSE-FVKI  | 605 |
| gi  | Bos_taurus_delta/gamma             | LEKDSSTLTPVVMALLKYWPKTHSPKEVMFLNELEEILDVIEPSE-FVKI  | 377 |
| gi  | Mus_musculus_delta/gamma           | LEKDSSTLTPVVMALLKYWPKTHSPKEVMFLNELEEILDVIEPSE-FVKI  | 380 |
| gi  | Rattus_norvegicus_delta/gam        | LEKDSSTLTPVVMALLKYWPKTHSPKEVMFLNELEEILDVIEPSE-FVKI  | 446 |
| gi  | Danio_rerio_gamma                  | LEKDSSTLTPVVMALLKYWPKTHSPKEVMFLNELEEILDVIEPSE-FVKV  | 323 |
| gi  | Danio_rerio_delta/gamma            | LEKDSSTLTPVVMALLKYWPKTHSPKEVMFLNELEEILDVIEPSE-FVKV  | 376 |
| gi  | Xenopus_laevis_delta/gamma         | LEKDSSTLTPVVMALLKYWPKTHSPKEVMFLNELEEILDVIEPSE-FVKV  | 376 |
| gi  | Xenopus_laevis_gamma               | LEKDSSTLTPVVMALLKYWPKTHSPKEVMFLNELEEILDVIEPSE-FVKV  | 376 |
| gi  | Xenopus_tropicalis_delta/ga        | LEKDSSTLTPVVMALLKYWPKTHSPKEVMFLNELEEILDVIEPSE-FVKV  | 376 |
| gi  | Mus_musculus_delta                 | LEKESSTLTPVIVGLLKFWPKTHSPKEVMFLNELEEILDVIEPSE-FSKV  | 391 |
| gi  | Rattus_norvegicus_delta            | LEKESSTLTPVIVGLLKFWPKTHSPKEVMFLNELEEILDVIEPSE-FSKV  | 419 |

Figure S1. Cont.



|                                 |                                                      |     |
|---------------------------------|------------------------------------------------------|-----|
| gi Felis_catus_delta            | LEKSSSLTEPVIVGLLKFWPKTHSPKEVMFLNELEEILDVIEPSE-FSKV   | 405 |
| gi Bos_taurus_delta             | LEKSSSLTEPVIVGLLKFWPKTHSPKEVMFLNELEEILDVIEPSE-FSKV   | 397 |
| gi Canis_lupus_familiaris_delt  | LEKSSSLTEPVIVGLLKFWPKTHSPKEVMFLNELEEILDVIEPSE-FSKV   | 392 |
| gi Macaca_mulatta_delta         | LEKSSSLTEPVIVGLLKFWPKTHSPKEVMFLNELEEILDVIEPSE-FSKV   | 408 |
| gi Homo_sapiens_delta           | LEKSSSLTEPVIVGLLKFWPKTHSPKEVMFLNELEEILDVIEPSE-FSKV   | 399 |
| gi Ovis_aries_delta             | LEKSSSLTEPVIVGLLKFWPKTHSPKEVMFLNELEEILDVIEPSE-FSKV   | 396 |
| gi Falco_peregrinus_delta       | LEKDSSLTEPVIVGLLKFWPKTHSPKEVMFLNELEEILDVIEPSE-FVKV   | 299 |
| gi Gallus_gallus_delta          | LEKDSSLTEPVIVGLLKFWPKTHSPKEVMFLNELEEILDVIEPSE-FVKV   | 394 |
| gi Alligator_mississippiensis_  | LEKDSSLTEPVIMGLLKFWPKTHSPKEVMFLNELEEILDVIEPSE-FVKV   | 393 |
| gi Chrysemys_picta_bellii_delt  | LEKSSSLTEPVIVGLLKFWPKTHSPKEVMFLNELEEILDVIEPSE-FVKV   | 395 |
| gi Danio_rerio_delta            | LEKDSSLTEPVIMGLLKFWPKTHSPKEVMFLNELEEILDVIEPSE-FVKV   | 386 |
| gi Ambystoma_mexicanum_delta    | LEKDSSLTEPVIVGLLKFWPKTHSPKEVMFLNELEEILDVIEPSE-FVKV   | 248 |
| gi Petromyzon_marinus_S4RN43    | LEKDSLTLTEPVVMGLLKYWPKTHSPKEVMFLNELEEILDVIEPSE-FVKV  | 376 |
| jgi Branchiostoma_floridae_237  | LEKDASLTEPVIMGLLKFWPKVHSPKEVMFLNELEEILDVIEPSE-FQKV   | 296 |
| jgi Branchiostoma_floridae_252  | LEKDASLTEPVIMGLLKFWPKVHSPKEVS--NKLGNLLVIHRRS-----    | 342 |
| gi Strongylocentrotus_purpurat  | LEKDPSLTEQVLRLLLFKWPKVHSPKEVMFLNELEEILDVIEPLE-FQKV   | 357 |
| gi Caenorhabditis_elegans_PPTR  | IEKDSSLTEPVISGMLRFWPKQHSPKEVMFLNELEEVLVDVIEPNE-FQKI  | 344 |
| gi Hydra_vulgaris_delta         | LEKDPTLTTEPCIMGLIKFWPKVHSTKEVMFLNELEEILDVIEPNE-FVKI  | 366 |
| gi Amphimedon_queenslandica_de  | LEKDPSLTEPVVTGLLKFWPKVHSPKEVMFLNELEEILDMVEPVE-FVKV   | 407 |
| gi Drosophila_melanogaster_B56  | LEKDPSLSEAVIKSLLKFWPKTHSPKEVMFLNELEEILDMVIEPAE-FQKV  | 480 |
| gi Dictyostelium_discoideum_ps  | IEKEPSLAEPFIFKSILRLWPCGNSQKEVFLSEMEDLLGLVSDEQ-FAKF   | 405 |
| gi Dictyostelium_purpureum_N/A  | IEKDPSLAEPFIFKSILRLWPCGNSQKEVFLSEMEDLLSSVSEDQ-FLKF   | 362 |
| gi Dictyostelium_fasciculatum_  | LEKDPMLALTIFKSILRQWPIGNSQKEVFLFLYEIEDLLGSIRDEQQFTEI  | 376 |
| gi Polysphondylium_pallidum_N/  | IEKDPTLSDVVFKTVLRMWPVGNSQKEVFLFLYEIEDLLNSIGEEQ-FMRI  | 353 |
| gi Arabidopsis_thaliana_theta   | VEKDCKLADTVIRGLLKSWPVTNSSKEVMFLNELEEVLLEATQPPPE-FQRC | 370 |
| gi Arabidopsis_thaliana_eta     | VEKDCKLADTVIRGLLKYWPVTNSSKEVMFLNEEEVLLEATQPPPE-FQRC  | 362 |
| gi Arabidopsis_thaliana_zeta    | VEKDFKLADTVIRGLLKYWPVTNSSKEVMFLGELEEVLLEATQAEE-FQRC  | 400 |
| gi Arabidopsis_thaliana_gamma   | VEKDFKLADTVIRGLLKYWPVTNSSKEVMFLGELEEVLLEATQAEE-FQRC  | 379 |
| gi Oryza                        | VEKDCKLADTVIRGLIKYWPITNSTKEVMFLGELEEILDATQPAE-FQKC   | 380 |
| gi Oryza_sativa_zeta            | VEKDCKLADTVIRGLLKYWPITNSSKEVFLGELEEILEATQPAE-FQKC    | 380 |
| gi Oryza_sativa_theta           | VEKDCKLADTVIRGLLKYWPITNSAKEVMFLGELEEVLLEATQPAE-FQRC  | 384 |
| gi Oryza_sativa_eta             | VEKDCKLADTVIRGLLKYWPVTNSSKEVMFLGELEEVLLEATQPAE-FQRC  | 373 |
| gi Arabidopsis_thaliana_delta   | VEKDCKLADTVIRGMLKYWPVTNSAKEIMFLNELEEILEATQLTE-FERC   | 358 |
| gi Arabidopsis_thaliana_N/A     | IDKEPKLGSVVIGLLKFWPITNSQKEVMFLGEVEEIVAMSVM-FQKI      | 364 |
| gi Oryza_sativa_kappa           | IEKDPKLASSVIGLLRYWPITNSQKEVMFLSEIEEILETISTAE-FQKC    | 370 |
| gi Oryza_sativa_N/A             | IEKEPKLAGTVIRGLLKYWPVTNSQKEMMFLGELEEVLLEATEMAE-FQKC  | 351 |
| gi Arabidopsis_thaliana_alpha   | VEKDYKLADTVIRGLLKFWPVTNCTKEVFLGELEEVLLEATQTVE-FQRC   | 369 |
| gi Arabidopsis_thaliana_beta    | VEKDYKLADTVIRGLLKYWPVTNCSKENLFLGELEEVLLEATQPVE-FQRC  | 369 |
| gi Oryza_sativa_N/A_2           | VEKDYKLADTVIRGLLKYWPVINCQKEVFLGELEEVLLEATQPAE-FQRC   | 409 |
| gi Arabidopsis_thaliana_epsilon | VEKDYKLADTVIRGLLKFWPLTNCQKEVFLGELEEVLDATEPSE-FQQC    | 378 |
| gi Chlamydomonas_reinhardtii_w  | VEKDSKLAEPVLTALLKYWPVTNSQKEVFLGELEEILELTQAPE-FQKV    | 367 |
| gi Schizosaccharomyces_pombe_P  | VEKDSVTEEVVLGLLRYWPKVNSSEVFLNEIEDIIEVMEPSE-FLKI      | 402 |
| gi Schizosaccharomyces_pombe_P  | IDKDPSLTAKAVLTGILKYWPRINSFKELLFLNEIEDIFEVLEPSE-FVNI  | 503 |
| gi Ashbya_gossypii_RTsl         | LEKEPMLTEEVIMGLLRYWPKVNSTKEIMFLNEIEDIFEVIEPLE-FIKV   | 465 |
| gi Saccharomyces_cerevisiae_RT  | LEKDPFLTEEVVMGLLRYWPKINSTKEIMFLNEIEDIFEVIEPLE-FIKV   | 572 |
|                                 |                                                      |     |
| gi Aspergillus_niger_N/A        | QVPLFQQAKSVASPHFQ-----                               | 474 |
| gi Aspergillus_nidulans_parA    | QEPLFQQAKSVASPHFQ-----                               | 476 |
| gi Mus_musculus_alpha           | EEPLFKQISKCVSSSHFQ-----                              | 366 |
| gi Rattus_norvegicus_alpha      | EEPLFKQISKCVSSSHFQ-----                              | 366 |
| gi Macaca_mulatta_alpha         | EEPLFKQISKCVSSSHFQ-----                              | 366 |
| gi Homo_sapiens_alpha           | EEPLFKQISKCVSSSHFQ-----                              | 366 |
| gi Ovis_aries_alpha             | EEPLFKQISKCVSSSHFQ-----                              | 369 |
| gi Bos_taurus_alpha             | EEPLFKQISKCVSSSHFQ-----                              | 369 |
| gi Felis_catus_alpha            | EEPLFKQISKCVSSSHFQ-----                              | 282 |
| gi Canis_lupus_familiaris_alph  | EEPLFKQISKCVSSSHFQ-----                              | 282 |
| gi Falco_peregrinus_alpha       | EEPLFKQISKCVSSSHFQ-----                              | 356 |
| gi Gallus_gallus_alpha          | EEPLFKQISKCVSSSHFQ-----                              | 356 |
| gi Alligator_mississippiensis_  | EEPLFKQISKCVSSSHFQ-----                              | 366 |
| gi Chrysemys_picta_bellii_alph  | EEPLFKQISKCVSSSHFQ-----                              | 356 |

Figure S1. Cont.

|                                   |                          |     |
|-----------------------------------|--------------------------|-----|
| gi Xenopus_laevis_alpha           | QEPLFKQISKCVSSSHFQ-----  | 355 |
| gi Xenopus_tropicalis_alpha       | QEPLFKQISKCVSSSHFQ-----  | 355 |
| gi Ambystoma_mexicanum_alpha      | QEPLFKQISKCVSSSHFQ-----  | 282 |
| gi Danio_rerio_alpha              | QEPLFKQIAKCVASPHFQ-----  | 358 |
| gi Petromyzon_marinus_S4RHV1      | QEPLFKQISRCVASPHLH-----  | 356 |
| gi Mus_musculus_epsilon           | QEPLFKQIAKCVSSPHFQ-----  | 358 |
| gi Rattus_norvegicus_epsilon      | QEPLFKQIAKCVSSPHFQ-----  | 358 |
| gi Macaca_mulatta_epsilon         | QEPLFKQIAKCVSSPHFQ-----  | 358 |
| gi Homo_sapiens_epsilon           | QEPLFKQIAKCVSSPHFQ-----  | 358 |
| gi Ovis_aries_epsilon             | QEPLFKQIAKCVSSPHFQ-----  | 358 |
| gi Bos_taurus_epsilon             | QEPLFKQIAKCVSSPHFQ-----  | 358 |
| gi Canis_lupus_familiaris_epsilon | QEPLFKQIAKCVSSPHFQ-----  | 358 |
| gi Falco_peregrinus_epsilon       | QEPLFKQIAKCVSSPHFQ-----  | 358 |
| gi Gallus_gallus_epsilon          | QEPLFKQIAKCVSSPHFQ-----  | 358 |
| gi Felis_catus_epsilon            | QEPLFKQIAKCVSSPHFQ-----  | 358 |
| gi Chrysemys_picta_bellii_epsilon | QEPLFKQIAKCVSSPHFQ-----  | 358 |
| gi Xenopus_laevis_epsilon         | QEPLFKQISKCVSSPHFQ-----  | 358 |
| gi Xenopus_tropicalis_epsilon     | QEPLFKQISKCVSSPHFQ-----  | 358 |
| gi Alligator_mississippiensis     | QEPLFKQIAKCVSSPHFQ-----  | 347 |
| gi Ambystoma_mexicanum_epsilon    | QEPLFKQISKCVSSPHFQ-----  | 354 |
| gi Danio_rerio_epsilon            | QEPLFKQIAKCVSSPHFQ-----  | 358 |
| gi Mus_musculus_beta              | QEPLFKQVARCVSSPHFQ-----  | 372 |
| gi Rattus_norvegicus_beta         | QEPLFKQVARCVSSPHFQ-----  | 372 |
| gi Felis_catus_beta               | QEPLFKQVARCVSSPHFQ-----  | 372 |
| gi Canis_lupus_familiaris_beta    | QEPLFKQVARCVSSPHFQ-----  | 372 |
| gi Homo_sapiens_beta              | QEPLFKQVARCVSSPHFQ-----  | 372 |
| gi Bos_taurus_beta                | QEPLFKQVARCVSSPHFQ-----  | 372 |
| gi Ovis_aries_beta                | QEPLFKQVARCVSSPHFQ-----  | 372 |
| gi Macaca_mulatta_beta            | QEPLFKQVARCVSSPHFQ-----  | 336 |
| gi Xenopus_laevis_beta            | -----SVFTCC-----         | 6   |
| gi Alligator_mississippiensis     | QQPLFKQVAQC IASPHFQ----- | 372 |
| gi Chrysemys_picta_bellii_beta    | QEPLFKQIARCISSPHFQ-----  | 372 |
| gi Xenopus_tropicalis_beta        | QEPLFKQIARCVSSPHFQ-----  | 370 |
| gi Danio_rerio_beta               | QEPLFKQIAAC ISSPHFQ----- | 371 |
| gi Ambystoma_mexicanum_beta       | QEPLFKQIARCIASPHFQ-----  | 241 |
| gi Petromyzon_marinus_S4RGA7      | QEPLFRQIAKCVSSPHFQ-----  | 135 |
| gi Strongylocentrotus_purpurat    | QEMLFRQLAKCVASPHFQ-----  | 354 |
| gi Drosophila_melanogaster_wdb    | QEPLFRQIAKCVSSPHFQ-----  | 353 |
| jgi Branchiostoma_floridae_237    | QEPLFKQISKCVSSPHFQ-----  | 309 |
| gi Hydra_vulgaris_alpha           | MEPLFKKISKCVSSPHFQ-----  | 362 |
| jgi Branchiostoma_floridae_112    | -----                    |     |
| jgi Branchiostoma_floridae_284    | QEQLFKQMSKCVSSPHFQ-----  | 322 |
| gi Caenorhabditis_elegans_PPTR    | IDPLFRQLAKCVSSPHFQ-----  | 383 |
| gi Amphimedon_queenslandica_be    | QEPLFRQLAKCVSSPHFQ-----  | 376 |
| gi Chrysemys_picta_bellii_gamm    | MEPLFRQLAKCVSSPHFQ-----  | 341 |
| gi Chrysemys_picta_bellii_delt    | MEPLFRQLAKCVSSPHFQ-----  | 266 |
| gi Falco_peregrinus_gamma         | MEPLFRQLAKCVSSPHFQ-----  | 341 |
| gi Falco_peregrinus_delta/gamm    | MEPLFRQLAKCVSSPHFQ-----  | 266 |
| gi Gallus_gallus_gamma            | MEPLFRQLAKCVSSPHFQ-----  | 341 |
| gi Alligator_mississippiensis     | MEPLFRQLAKCVSSPHFQ-----  | 341 |
| gi Alligator_mississippiensis     | MEPLFRQLAKCVSSPHFQ-----  | 266 |
| gi Ambystoma_mexicanum_gamma      | MEPLFRQLAKCVSSPHFQ-----  | 342 |
| gi Mus_musculus_gamma             | MEPLFRQLAKCVSSPHFQ-----  | 341 |
| gi Rattus_norvegicus_gamma        | MEPLFRQLAKCVSSPHFQ-----  | 341 |
| gi Ovis_aries_gamma               | MEPLFRQLAKCVSSPHFQ-----  | 341 |
| gi Bos_taurus_gamma               | MEPLFRQLAKCVSSPHFQ-----  | 341 |
| gi Canis_lupus_familiaris_gamm    | MEPLFRQLAKCVSSPHFQ-----  | 341 |
| gi Macaca_mulatta_gamma           | MEPLFRQLAKCVSSPHFQ-----  | 341 |
| gi Homo_sapiens_gamma             | MEPLFRQLAKCVSSPHFQ-----  | 331 |
| gi Felis_catus_gamma              | MEPLFRQLAKCVSSPHFQ-----  | 388 |
| gi Canis_lupus_familiaris_delt    | MEPLFRQLAKCVSSPHFQ-----  | 388 |

Figure S1. Cont.

|     |                              |                                                    |     |
|-----|------------------------------|----------------------------------------------------|-----|
| gi  | Macaca_mulatta_delta/gamma   | MEPLFRQLAKCVSSPHFQ-----                            | 623 |
| gi  | Bos_taurus_delta/gamma       | MEPLFRQLAKCVSSPHFQ-----                            | 395 |
| gi  | Mus_musculus_delta/gamma     | MEPLFRQLAKCVSSPHFQ-----                            | 398 |
| gi  | Rattus_norvegicus_delta/gam  | MEPLFRQLAKCVSSPHFQ-----                            | 464 |
| gi  | Danio_rerio_gamma            | MEPLFRQLAKCVSSPHFQ-----                            | 341 |
| gi  | Danio_rerio_delta/gamma      | MEPLFRQLAKCVSSPHFQ-----                            | 394 |
| gi  | Xenopus_laevis_delta/gamma   | MEPLFRQLAKCVSSPHFQ-----                            | 394 |
| gi  | Xenopus_laevis_gamma         | MEPLFRQLAKCVSSPHFQ-----                            | 394 |
| gi  | Xenopus_tropicalis_delta/ga  | MEPLFRQLAKCVSSPHFQ-----                            | 394 |
| gi  | Mus_musculus_delta           | MEPLFRQLAKCVSSPHFQ-----                            | 409 |
| gi  | Rattus_norvegicus_delta      | MEPLFRQLAKCVSSPHFQ-----                            | 437 |
| gi  | Felis_catus_delta            | MEPLFRQLAKCVSSPHFQ-----                            | 423 |
| gi  | Bos_taurus_delta             | MEPLFRQLAKCVSSPHFQ-----                            | 415 |
| gi  | Canis_lupus_familiaris_delt  | MEPLFRQLAKCVSSPHFQ-----                            | 410 |
| gi  | Macaca_mulatta_delta         | MEPLFRQLAKCVSSPHFQ-----                            | 426 |
| gi  | Homo_sapiens_delta           | MEPLFRQLAKCVSSPHFQ-----                            | 417 |
| gi  | Ovis_aries_delta             | MEPLFRQLAKCVSSPHFQ-----                            | 414 |
| gi  | Falco_peregrinus_delta       | MEPLFRQLAKCVSSPHFQ-----                            | 317 |
| gi  | Gallus_gallus_delta          | MEPLFRQLAKCVSSPHFQ-----                            | 412 |
| gi  | Alligator_mississippiensis_  | MEPLFRQLAKCVSSPHFQ-----                            | 411 |
| gi  | Chrysemys_picta_bellii_delt  | MEPLFRQLAKCVSSPHFQ-----                            | 413 |
| gi  | Danio_rerio_delta            | MEPLFRQLAKCVSSPHFQ-----                            | 404 |
| gi  | Ambystoma_mexicanum_delta    | MEPLFRQLAKCVSSPHFQ-----                            | 266 |
| gi  | Petromyzon_marinus_S4RN43    | MEPLFRQLAKCVSSPHFQ-----                            | 394 |
| jgi | Branchiostoma_floridae_237   | MVPLFRQLAQCVSSPHFQ-----                            | 314 |
| jgi | Branchiostoma_floridae_252   | -IVLNEDFFFGYSN-ISQ-----                            | 358 |
| gi  | Strongylocentrotus_purpurat  | MTPLFQQLANCVSSPHFQ-----                            | 375 |
| gi  | Caenorhabditis_elegans_PPTR  | MTPLFSQIARCVSSPHFQ-----                            | 362 |
| gi  | Hydra_vulgaris_delta         | VEPLFKKLGQCQVSSQHFQ-----                           | 384 |
| gi  | Amphimedon_queenslandica_de  | MQPLFKQISKCISSQHFQ-----                            | 425 |
| gi  | Drosophila_melanogaster_B56  | MVPLFRQIAKCVSSPHFQ-----                            | 498 |
| gi  | Dictyostelium_discoideum_ps  | RNQFFRQMTKCFQSEHFQ-----                            | 423 |
| gi  | Dictyostelium_purpureum_N/A  | RTQFFRQMTKCFQSEHFQ-----                            | 380 |
| gi  | Dictyostelium_fasciculatum_  | QQILFKQLARCFQSEHFQ-----                            | 394 |
| gi  | Polysphondylium_pallidum_N/  | YIPLFKQITKCFNSEHFQ-----                            | 371 |
| gi  | Arabidopsis_thaliana_theta   | MVPLFRQVARCLNSLHFQ-----                            | 388 |
| gi  | Arabidopsis_thaliana_eta     | MVPLFRQIARCLNSLHFQAISFRHTLTALLMRSRYSLPVISNEQMEELIL | 412 |
| gi  | Arabidopsis_thaliana_zeta    | MVPLSRQIARCLNSSHFQ-----                            | 418 |
| gi  | Arabidopsis_thaliana_gamma   | MVPLFRQIARCLNSSHFQ-----                            | 397 |
| gi  | Oryza                        | MVPLFRQIACCLNSSHFQ-----                            | 398 |
| gi  | Oryza_sativa_zeta            | MVPLFRQIAHCLNSSHFQ-----                            | 398 |
| gi  | Oryza_sativa_theta           | MVSLFCQIARCLNSSHFQ-----                            | 402 |
| gi  | Oryza_sativa_eta             | MVPLFRQIACSMNSSHFQ-----                            | 391 |
| gi  | Arabidopsis_thaliana_delta   | MVPLSRQIAQCLSSSHFQ-----                            | 376 |
| gi  | Arabidopsis_thaliana_N/A     | MVPLFLRIACCVTSSSHFQ-----                           | 382 |
| gi  | Oryza_sativa_kappa           | MVPLFRRIAQCICKSSHFQ-----                           | 388 |
| gi  | Oryza_sativa_N/A             | MVPLFRRIAHCCLNSSHFQ-----                           | 369 |
| gi  | Arabidopsis_thaliana_alpha   | MVPLFQQIARCLSSSNFQ-----                            | 387 |
| gi  | Arabidopsis_thaliana_beta    | MVPLFQQIGRCLTSSSHFQ-----                           | 387 |
| gi  | Oryza_sativa_N/A_2           | MVPLFKQIGRCLNSSHFQ-----                            | 427 |
| gi  | Arabidopsis_thaliana_epsilon | VVPLFTQIGKCLNSAHFQ-----                            | 396 |
| gi  | Chlamydomonas_reinhardtii_w  | MIPLFRQLAKCLNSQHFQ-----                            | 385 |
| gi  | Schizosaccharomyces_pombe_P  | QVPLFHKLATSISSQNFQ-----                            | 420 |
| gi  | Schizosaccharomyces_pombe_P  | MSPLFQQIARSISSMHFQ-----                            | 521 |
| gi  | Ashbya_gossypii_RTS1         | EVPLFVQLAKCISSPHFQ-----                            | 483 |
| gi  | Saccharomyces_cerevisiae_RT  | EVPLFVQLRKCISSPHFQ-----                            | 590 |
| gi  | Aspergillus_niger_N/A        | -----VAERALYFWNNEYFCNLVSDNVEIILP--IMFPP            | 506 |
| gi  | Aspergillus_nidulans_parA    | -----VAERALYFWNNEYFCNLVSDNVEIILP--IMFPP            | 508 |
| gi  | Mus_musculus_alpha           | -----VAERALYFWNNEYILSLIEENIDKILP--IMFAS            | 398 |

Figure S1. Cont.

|                                |                                         |     |
|--------------------------------|-----------------------------------------|-----|
| gi Rattus_norvegicus_alpha     | -----VAERALYFWNNEYILSLIEENIDKILP--IMFAS | 398 |
| gi Macaca_mulatta_alpha        | -----VAERALYFWNNEYILSLIEENIDKILP--IMFAS | 398 |
| gi Homo_sapiens_alpha          | -----VAERALYFWNNEYILSLIEENIDKILP--IMFAS | 398 |
| gi Ovis_aries_alpha            | -----VAERALYFWNNEYILSLIEENIDKILP--IMFGS | 401 |
| gi Bos_taurus_alpha            | -----VAERALYFWNNEYILSLIEENIDKILP--IMFGS | 401 |
| gi Felis_catus_alpha           | -----VAERALYFWNNEYILSLIEENIDKILP--IMFGS | 314 |
| gi Canis_lupus_familiaris_alph | -----VAERALYFWNNEYILSLIEENIDKILP--IMFGS | 314 |
| gi Falco_peregrinus_alpha      | -----VAERALYFWNNEYILSLIEENIDKILP--IMFAS | 388 |
| gi Gallus_gallus_alpha         | -----VAERALYFWNNEYILSLIEENIDKILP--IMFGS | 388 |
| gi Alligator_mississippiensis  | -----VAERALYFWNNEYILSLIEENIDKILP--IMFGS | 398 |
| gi Chrysemys_picta_bellii_alph | -----VAERALYFWNNEYILSLIEENIDKILP--IMFGS | 388 |
| gi Xenopus_laevis_alpha        | -----VAERALYFWNNEYILSLIEENIDKILP--IMFGS | 387 |
| gi Xenopus_tropicalis_alpha    | -----VAERALYFWNNEYILSLIEENIDKILP--IMFGS | 387 |
| gi Ambystoma_mexicanum_alpha   | -----VAERALYFWNNEYILSLIEENIDKILP--IMFGS | 314 |
| gi Danio_rerio_alpha           | -----VAERALYFWNNEYILSLIEENIDKILP--IMFGN | 390 |
| gi Petrotyzon_marinus_S4RHV1   | -----VAERALYFWNNEYILSLIEENIDKILP--IMFGN | 388 |
| gi Mus_musculus_epsilon        | -----VAERALYFWNNEYIMSLIEENIDKILP--IMFSS | 390 |
| gi Rattus_norvegicus_epsilon   | -----VAERALYFWNNEYIMSLIEENIDKILP--IMFSS | 390 |
| gi Macaca_mulatta_epsilon      | -----VAERALYFWNNEYIMSLIEENIDKILP--IMFSS | 390 |
| gi Homo_sapiens_epsilon        | -----VAERALYFWNNEYIMSLIEENIDKILP--IMFSS | 390 |
| gi Ovis_aries_epsilon          | -----VAERALYFWNNEYIMSLIEENIDKILP--IMFSS | 390 |
| gi Bos_taurus_epsilon          | -----VAERALYFWNNEYIMSLIEENIDKILP--IMFSS | 390 |
| gi Canis_lupus_familiaris_epsi | -----VAERALYFWNNEYIMSLIEENIDKILP--IMFSS | 390 |
| gi Xenopus_tropicalis_epsilon  | -----VAERALYFWNNEYIMSLIEENIDKILP--IMFSS | 390 |
| gi Gallus_gallus_epsilon       | -----VAERALYFWNNEYIMSLIEENIDKILP--IMFSS | 390 |
| gi Felis_catus_epsilon         | -----VAERALYFWNNEYIMSLIEENIDKILP--IMFSS | 390 |
| gi Chrysemys_picta_bellii_epsi | -----VAERALYFWNNEYIMSLIEENIDKILP--IMFSS | 390 |
| gi Xenopus_laevis_epsilon      | -----VAERALYFWNNEYIMSLIEENIDKILP--IMFAS | 390 |
| gi Xenopus_tropicalis_epsilon  | -----VAERALYFWNNEYIMSLIEENIDKILP--IMFAS | 390 |
| gi Alligator_mississippiensis  | -----VAERALYFWNNEYIMSLIEENIDKILP--IMFSS | 379 |
| gi Ambystoma_mexicanum_epsilon | -----VAERALYFWNNEYIMSLIEENIDKILP--IMFAS | 386 |
| gi Danio_rerio_epsilon         | -----VAERALYFWNNEYIMSLIEENIDKILP--IMFAS | 390 |
| gi Mus_musculus_beta           | -----VAERALYFWNNEYILSLIEDNCHTVLP--AVFGT | 404 |
| gi Rattus_norvegicus_beta      | -----VAERALYFWNNEYILSLIEDNCHTVLP--AVFGT | 404 |
| gi Felis_catus_beta            | -----VAERALYFWNNEYILSLIEDNCHTVLP--AVFGT | 404 |
| gi Canis_lupus_familiaris_beta | -----VAERALYFWNNEYILSLIEDNCHTVLP--AVFGT | 404 |
| gi Homo_sapiens_beta           | -----VAERALYFWNNEYILSLIEDNCHTVLP--AVFGT | 404 |
| gi Bos_taurus_beta             | -----VAERALYFWNNEYILSLIEDNCHTVLP--AVFGT | 404 |
| gi Ovis_aries_beta             | -----VAERALYFWNNEYILSLIEDNCHTVLP--AVFGT | 404 |
| gi Macaca_mulatta_beta         | -----VAERALYFWNNEYILSLIEDNCHTVLP--AVFGT | 368 |
| gi Xenopus_laevis_beta         | -----YYWD-----GFLP--TSFS-               | 18  |
| gi Alligator_mississippiensis  | -----VAERALYFWNNEYILSLIEDNCHTVLP--AVFGT | 404 |
| gi Chrysemys_picta_bellii_beta | -----VAERALYFWNNEYILSLIEDNCHTVLP--AVFGT | 404 |
| gi Xenopus_tropicalis_beta     | -----VAERALYFWNNEYILSLIEDNCHTVLP--AVFGT | 402 |
| gi Danio_rerio_beta            | -----VAERALYFWNNEYILSLIEDNCHTVLP--AVFGT | 403 |
| gi Ambystoma_mexicanum_beta    | -----VAERALYFWNNEYILSLIEDNCHTVLP--AVFGT | 273 |
| gi Petrotyzon_marinus_S4RGA7   | -----VAERALYFWNNEYILSLIEDNCHTVLP--AVFGT | 167 |
| gi Strongylocentrotus_purpurat | -----VAERALYFWNNEYVMSLIEENIDKILP--IMFTN | 386 |
| gi Drosophila_melanogaster_wdb | -----VAERALYFWNNEYVMSLIEENIDKILP--IMFPA | 385 |
| jgi Branchiostoma_floridae_237 | -----VAERALYFWNNEYVMSLIEENIDKILP--IMFPN | 341 |
| gi Hydra_vulgaris_alpha        | -----VAERALYFWNNEYIMSLIDENSAVILP--IMFSC | 394 |
| jgi Branchiostoma_floridae_112 | -----VAERALYFWNNEYVMSLIEENIDKILP--IMFSC | 354 |
| jgi Branchiostoma_floridae_284 | -----VAERALYFWNNEYVMSLIEENIDKILP--IMFSC | 415 |
| gi Caenorhabditis_elegans_PPTR | -----VAERALYFWNNEYIVGLIQENSEVIMP--IMFDA | 408 |
| gi Chrysemys_picta_bellii_gamm | -----VAERALYFWNNEYIMSLIDENSAVILP--IMFPA | 373 |
| gi Chrysemys_picta_bellii_delt | -----VAERALYFWNNEYIMSLIDENSAVILP--IMFPA | 298 |
| gi Falco_peregrinus_gamma      | -----VAERALYFWNNEYIMSLIDENSAVILP--IMFPA | 373 |
| gi Falco_peregrinus_delta/gamm | -----VAERALYFWNNEYIMSLIDENSAVILP--IMFPA | 298 |
| gi Gallus_gallus_gamma         | -----VAERALYFWNNEYIMSLIDENSAVILP--IMFPA | 373 |
| gi Alligator_mississippiensis  | -----VAERALYFWNNEYIMSLIDENSAVILP--IMFPA | 373 |

Figure S1. Cont.

|     |                             |                                                     |     |
|-----|-----------------------------|-----------------------------------------------------|-----|
| gi  | Alligator_mississippiensis_ | -----VAERALYYWNNEYIMSLISDNAAKILP--IMFPS             | 298 |
| gi  | Ambystoma_mexicanum_gamma   | -----VAERALYYWNNEYIMSLISDNAAKILP--IMFPS             | 374 |
| gi  | Mus_musculus_gamma          | -----VAERALYYWNNEYIMSLISDNAAKILP--IMFPS             | 373 |
| gi  | Rattus_norvegicus_gamma     | -----VAERALYYWNNEYIMSLISDNAAKILP--IMFPS             | 373 |
| gi  | Ovis_aries_gamma            | -----VAERALYYWNNEYIMSLISDNAAKILP--IMFPS             | 373 |
| gi  | Bos_taurus_gamma            | -----VAERALYYWNNEYIMSLISDNAAKILP--IMFPS             | 373 |
| gi  | Canis_lupus_familiaris_gamm | -----VAERALYYWNNEYIMSLISDNAAKILP--IMFPS             | 373 |
| gi  | Macaca_mulatta_gamma        | -----VAERALYYWNNEYIMSLISDNAAKILP--IMFPS             | 373 |
| gi  | Homo_sapiens_gamma          | -----VAERALYYWNNEYIMSLISDNAAKILP--IMFPS             | 363 |
| gi  | Felis_catus_gamma           | -----VAERALYYWNNEYIMSLISDNAAKILP--IMFPS             | 420 |
| gi  | Canis_lupus_familiaris_delt | -----VAERALYYWNNEYIMSLISDNAAKILP--IMFPS             | 420 |
| gi  | Macaca_mulatta_delta/gamma  | -----VAERALYYWNNEYIMSLISDNAAKILP--IMFPS             | 655 |
| gi  | Bos_taurus_delta/gamma      | -----VAERALYYWNNEYIMSLISDNAAKILP--IMFPS             | 427 |
| gi  | Mus_musculus_delta/gamma    | -----VAERALYYWNNEYIMSLISDNAAKILP--IMFPS             | 430 |
| gi  | Rattus_norvegicus_delta/gam | -----VAERALYYWNNEYIMSLISDNAAKILP--IMFPS             | 496 |
| gi  | Danio_rerio_gamma           | -----VAERALYYWNNEYIMSLISDNAAKILP--IMFPS             | 373 |
| gi  | Danio_rerio_delta/gamma     | -----VAERALYYWNNEYIMSLISDNAAKILP--IMFPS             | 426 |
| gi  | Xenopus_laevis_delta/gamma  | -----VAERALYYWNNEYIMSLISDNAAKILP--IMFPS             | 426 |
| gi  | Xenopus_laevis_gamma        | -----VAERALYYWNNEYIMSLISDNAAKILP--IMFPS             | 426 |
| gi  | Xenopus_tropicalis_delta/ga | -----VAERALYYWNNEYIMSLISDNAAKILP--IMFPS             | 426 |
| gi  | Mus_musculus_delta          | -----VAERALYYWNNEYIMSLISDNAAKILP--IMFPA             | 441 |
| gi  | Rattus_norvegicus_delta     | -----VAERALYYWNNEYIMSLISDNAARVLP--IMFPA             | 469 |
| gi  | Felis_catus_delta           | -----VAERALYYWNNEYIMSLISDNAARVLP--IMFPA             | 455 |
| gi  | Bos_taurus_delta            | -----VAERALYYWNNEYIMSLISDNAARVLP--IMFPA             | 447 |
| gi  | Canis_lupus_familiaris_delt | -----VAERALYYWNNEYIMSLISDNAARVLP--IMFPA             | 442 |
| gi  | Macaca_mulatta_delta        | -----VAERALYYWNNEYIMSLISDNAARVLP--IMFPA             | 458 |
| gi  | Homo_sapiens_delta          | -----VAERALYYWNNEYIMSLISDNAARVLP--IMFPA             | 449 |
| gi  | Ovis_aries_delta            | -----VAERALYYWNNEYIMSLISDNAARVLP--IMFPA             | 446 |
| gi  | Falco_peregrinus_delta      | -----VAERALYYWNNEYIMSLISDNAARVLP--IMFPA             | 349 |
| gi  | Gallus_gallus_delta         | -----VAERALYYWNNEYIMSLISDNAAKILP--IMFPA             | 444 |
| gi  | Alligator_mississippiensis_ | -----VAERALYYWNNEYIMSLISDNAAKILP--IMFPA             | 443 |
| gi  | Chrysemys_picta_bellii_delt | -----VAERALYYWNNEYIMSLISDNAAKILP--IMFPA             | 445 |
| gi  | Danio_rerio_delta           | -----VAERALYYWNNEYIMSLISDNAAKILP--IMFPA             | 436 |
| gi  | Ambystoma_mexicanum_delta   | -----VAERALYYWNNEYIMSLISDNAAKILP--IMFPA             | 298 |
| gi  | Petromyzon_marinus_S4RN43   | -----VAERALYYWNNEYIMSLVSDNAAKILP--IMFPA             | 426 |
| jgi | Branchiostoma_floridae_237  | -----VAERALYYWNNEYIMSLISDNAQVILP--IMFPA             | 346 |
| jgi | Branchiostoma_floridae_252  | -----VAERALYYWNNEYIMSLISDNAQVILP--IMFPA             | 390 |
| gi  | Strongylocentrotus_purpurat | -----VAERALYYWNNEYIMSLISDNDETILP--IMFPA             | 407 |
| gi  | Caenorhabditis_elegans_PPTR | -----VAERALYYWNNEYVMSLVADNARVIP--IMFPV              | 394 |
| gi  | Hydra_vulgaris_delta        | -----VAERALYYWNNEYIMSLVSDNATKAIP--IIFPY             | 416 |
| gi  | Amphimedon_queenslandica_de | -----VAERALYYWSNDYIMSLVGENPQALFP--IILPA             | 457 |
| gi  | Drosophila_melanogaster_B56 | -----VAERALYYWNNEYIMSLITDNSAVILP--IMFPA             | 530 |
| gi  | Dictyostelium_discoideum_ps | -----VAERALYLFSNENIVLLIASKNNTLALETIFYKP             | 457 |
| gi  | Dictyostelium_purpureum_N/A | -----VAERALYLFSNENIVLLIASKNNTLALETIFYKP             | 414 |
| gi  | Dictyostelium_fasciculatum_ | -----VAERSLLLLSNEHIVGLLSKRSVPALALNYFYKI             | 428 |
| gi  | Polysphondylium_pallidum_N/ | -----VAERALLWSNDHVSVLSVSKTCLP-----NV                | 398 |
| gi  | Arabidopsis_thaliana_theta  | -----VAERALFLWNNNDHIENLIMQNRKVILP--IIFPA            | 420 |
| gi  | Arabidopsis_thaliana_eta    | RYGKYQCLGLLYSALGVAERALFLWNNNDHIENLIMQNRKVILP--IIFPA | 460 |
| gi  | Arabidopsis_thaliana_zeta   | -----VAERALFLWNNNDHIRNLITQNHKVIMP--IVFPA            | 450 |
| gi  | Arabidopsis_thaliana_gamma  | -----VAERALFLWNNNDHIRNLITQNHKVIMP--IVFPA            | 429 |
| gi  | Oryza                       | -----VAERALFLWNNNDHIENLIRQNSKVILP--IIFSA            | 430 |
| gi  | Oryza_sativa_zeta           | -----VAERALFLWNNNDHIENLIKQNSRVILP--IIFPA            | 430 |
| gi  | Oryza_sativa_theta          | -----VAERALFLWNNNDHIEVLIKQNSKVILP--IILPA            | 434 |
| gi  | Oryza_sativa_eta            | -----VAERALFLWNNNDHIENLIKQNYKVILP--IIFPA            | 423 |
| gi  | Arabidopsis_thaliana_delta  | -----VAERALYLWNNNDHVTNLVRQNSRIILP--IVFPA            | 408 |
| gi  | Arabidopsis_thaliana_N/A    | -----VSERALFLWNNNDQIVNLIGHNRQAILP--IMFTA            | 414 |
| gi  | Oryza_sativa_kappa          | -----VAERALFIWNNNDNVISLIAQNRQMIMP--IIVPA            | 420 |
| gi  | Oryza_sativa_N/A            | -----VAERALFLWNNNEHLFDLISQNRQTIMP--IIPYA            | 401 |
| gi  | Arabidopsis_thaliana_alpha  | -----VAERALFLWNNNEHVGLIAQNRGVILP--IIFAS             | 419 |
| gi  | Arabidopsis_thaliana_beta   | -----VAERALFLWNNNEHIVGLIAQNRSVILP--IIYPT            | 419 |
| gi  | Oryza_sativa_N/A_2          | -----VAERALFLWNNNDHIVSLIAQNRSVIFP--IIFEA            | 459 |

Figure S1. Cont.

|                                 |                                         |     |
|---------------------------------|-----------------------------------------|-----|
| gi Arabidopsis_thaliana_epsilon | -----VAERALFLWNNEHIVGLIAQNKDVIFF--IIFEA | 428 |
| gi Chlamydomonas_reinhardtii_w  | -----VAERSLFLWNNEYIVNLVAQHRHQLLP--ILFPA | 417 |
| gi Schizosaccharomyces_pombe_P  | -----VAERALYFFNNDYFVHLVEENVDIILP--IIYPA | 452 |
| gi Schizosaccharomyces_pombe_P  | -----VAERALCLWSNEYFTSLVSQNVVTLPL--IIYPS | 553 |
| gi Ashbya_gossypii_RTSl         | -----VAEKVLSYWNNEYFLNLCIENAEVILP--IIFPA | 515 |
| gi Saccharomyces_cerevisiae_RT  | -----VAEKVLSYWNNEYFLNLCIENAEVILP--IIFPA | 622 |
|                                 |                                         |     |
| gi Aspergillus_niger_N/A        | LYENS-----KGHWNRTHSMVYNAMK              | 528 |
| gi Aspergillus_nidulans_parA    | LFENS-----KGHWNRTHSMVYNAMK              | 530 |
| gi Mus_musculus_alpha           | LYKIS-----KEHWNQTIVALVYNVLK             | 420 |
| gi Rattus_norvegicus_alpha      | LYKIS-----KEHWNQTIVALVYNVLK             | 420 |
| gi Macaca_mulatta_alpha         | LYKIS-----KEHWNPTIVALVYNVLK             | 420 |
| gi Homo_sapiens_alpha           | LYKIS-----KEHWNPTIVALVYNVLK             | 420 |
| gi Ovis_aries_alpha             | LYKIS-----KEHWNPTIVALVYNVLK             | 423 |
| gi Bos_taurus_alpha             | LYKIS-----KEHWNPTIVALVYNVLK             | 423 |
| gi Felis_catus_alpha            | LYKIS-----KEHWNPTIVALVYNVLK             | 336 |
| gi Canis_lupus_familiaris_alph  | LYKIS-----KEHWNPTIVALVYNVLK             | 336 |
| gi Falco_peregrinus_alpha       | LYKIS-----KEHWNPTIVALVYNVLK             | 410 |
| gi Gallus_gallus_alpha          | LYKIS-----KEHWNPTIVALVYNVLK             | 410 |
| gi Alligator_mississippiensis   | LYKIS-----KEHWNPTIVALVYNVLK             | 420 |
| gi Chrysemys_picta_bellii_alph  | LYKIS-----KEHWNPTIVALVYNVLK             | 410 |
| gi Xenopus_laevis_alpha         | LYKIS-----KEHWNPTIVALVYNVLK             | 409 |
| gi Xenopus_tropicalis_alpha     | LYKIS-----KEHWNPTIVALVYNVLK             | 409 |
| gi Ambystoma_mexicanum_alpha    | LYKIS-----KEHWNPTIVALVYNVLK             | 336 |
| gi Danio_rerio_alpha            | LYRIS-----KEHWNPTIVALVYNVLK             | 412 |
| gi Petromyzon_marinus_S4RHV1    | LYKMS-----EEHWNQTILGLNFMVMK             | 410 |
| gi Mus_musculus_epsilon         | LYRIS-----KEHWNPAIVALVYNVLK             | 412 |
| gi Rattus_norvegicus_epsilon    | LYRIS-----KEHWNPAIVALVYNVLK             | 412 |
| gi Macaca_mulatta_epsilon       | LYRIS-----KEHWNPAIVALVYNVLK             | 412 |
| gi Homo_sapiens_epsilon         | LYRIS-----KEHWNPAIVALVYNVLK             | 412 |
| gi Ovis_arie_epsilon            | LYRIS-----KEHWNPAIVALVYNVLK             | 412 |
| gi Bos_taurus_epsilon           | LYRIS-----KEHWNPAIVALVYNVLK             | 412 |
| gi Canis_lupus_familiaris_epsi  | LYRIS-----KEHWNPAIVALVYNVLK             | 412 |
| gi Falco_peregrinus_epsilon     | LYRIS-----KEHWNPAIVALVYNVLK             | 412 |
| gi Gallus_gallus_epsilon        | LYRIS-----KEHWNPAIVALVYNVLK             | 412 |
| gi Felis_catus_epsilon          | LYRIX-----KEHWNPAIVALVYNVLK             | 412 |
| gi Chrysemys_picta_bellii_epsi  | LYRIS-----KEHWNPAIVALVYNVLK             | 412 |
| gi Xenopus_laevis_epsilon       | LYRIS-----KEHWNPAIVALVYNVLK             | 412 |
| gi Xenopus_tropicalis_epsilon   | LYRIS-----KEHWNPAIVALVYNVLK             | 412 |
| gi Alligator_mississippiensis   | LYRIS-----KEHWNPAIVALVYNVLK             | 401 |
| gi Ambystoma_mexicanum_epsilon  | LYRIS-----KEHWNPAIVALVYNVLK             | 408 |
| gi Danio_rerio_epsilon          | LYRIS-----KEHWNPAISALIYNVLK             | 412 |
| gi Mus_musculus_beta            | LYQVS-----KEHWNQTIVSLIYNVLK             | 426 |
| gi Rattus_norvegicus_beta       | LYQVS-----KEHWNQTIVSLIYNVLK             | 426 |
| gi Felis_catus_beta             | LYQVS-----KEHWNQTIVSLIYNVLK             | 426 |
| gi Canis_lupus_familiaris_beta  | LYQVS-----KEHWNQTIVSLIYNVLK             | 426 |
| gi Homo_sapiens_beta            | LYQVS-----KEHWNQTIVSLIYNVLK             | 426 |
| gi Bos_taurus_beta              | LYQVS-----KEHWNQTIVSLIYNVLK             | 426 |
| gi Ovis_aries_beta              | LYQVS-----KEHWNQTIVSLIYNVLK             | 426 |
| gi Macaca_mulatta_beta          | LYQVS-----KEHWNQTIVSLIYNVLK             | 390 |
| gi Xenopus_laevis_beta          | -----AHR--TIVSLIYNVLK                   | 32  |
| gi Alligator_mississippiensis   | LYRVS-----KEHWNQTIVSLVYNVLK             | 426 |
| gi Chrysemys_picta_bellii_beta  | LYRVS-----KEHWNQTIVSLVYNVLK             | 426 |
| gi Xenopus_tropicalis_beta      | LYQVS-----KEHWNQTIVSLIYNVLK             | 424 |
| gi Danio_rerio_beta             | LYRVS-----KEHWNQTIIISLIYNVLK            | 425 |
| gi Ambystoma_mexicanum_beta     | LYRVS-----KEHWNQTIVSLIYNVLK             | 295 |
| gi Petromyzon_marinus_S4RGA7    | LYRVS-----KEHWNQTIVALVYNILK             | 189 |
| gi Strongylocentrotus_purpurat  | LYRIS-----KDHWNQTIVALVYNVLR             | 408 |
| gi Drosophila_melanogaster_wdb  | LYRIS-----KEHWNQTIVALVYNVLK             | 407 |
| jgi Branchiostoma_floridae_237  | LYRIS-----KEHWNQTIVALVYNVLK             | 363 |

Figure S1. Cont.

|                                 |                              |     |
|---------------------------------|------------------------------|-----|
| gi Hydra_vulgaris_alpha         | LYRIS-----KDHWNQTI VALVYNVLK | 416 |
| jgi Branchiostoma_floridiae_112 | -----                        |     |
| jgi Branchiostoma_floridiae_284 | LYRIS-----KDHWNQTI VALVYNVLK | 376 |
| gi Caenorhabditis_elegans_PPTR  | LYRIS-----KEHWNQTI VALVYNVLK | 437 |
| gi Amphimedon_queenslandica_be  | LYRIS-----KEHWNKAIVSLVYNVLK  | 430 |
| gi Chrysemys_picta_bellii_gamm  | LYRNS-----KTHWNKTIHGLIYNALK  | 395 |
| gi Chrysemys_picta_bellii_delt  | LYRNS-----KTHWNKTIHGLIYNALK  | 320 |
| gi Falco_peregrinus_gamma       | LYRNS-----KTHWNKTIHGLIYNALK  | 395 |
| gi Falco_peregrinus_delta/gamm  | LYRNS-----KTHWNKTIHGLIYNALK  | 320 |
| gi Gallus_gallus_gamma          | LYRNS-----KTHWNKTIHGLIYNALK  | 395 |
| gi Alligator_mississippiensis_  | LYRNS-----KTHWNKTIHGLIYNALK  | 395 |
| gi Alligator_mississippiensis_  | LYRNS-----KTHWNKTIHGLIYNALK  | 320 |
| gi Ambystoma_mexicanum_gamma    | LYRNS-----KTHWNKTIHGLIYNALK  | 396 |
| gi Mus_musculus_gamma           | LYRNS-----KTHWNKTIHGLIYNALK  | 395 |
| gi Rattus_norvegicus_gamma      | LYRNS-----KTHWNKTIHGLIYNALK  | 395 |
| gi Ovis_aries_gamma             | LYRNS-----KTHWNKTIHGLIYNALK  | 395 |
| gi Bos_taurus_gamma             | LYRNS-----KTHWNKTIHGLIYNALK  | 395 |
| gi Canis_lupus_familiaris_gamm  | LYRNS-----KTHWNKTIHGLIYNALK  | 395 |
| gi Macaca_mulatta_gamma         | LYRNS-----KTHWNKTIHGLIYNALK  | 395 |
| gi Homo_sapiens_gamma           | LYRNS-----KTHWNKTIHGLIYNALK  | 385 |
| gi Felis_catus_gamma            | LYRNS-----KTHWNKTIHGLIYNALK  | 442 |
| gi Canis_lupus_familiaris_delt  | LYRNS-----KTHWNKTIHGLIYNALK  | 442 |
| gi Macaca_mulatta_delta/gamma   | LYRNS-----KTHWNKTIHGLIYNALK  | 677 |
| gi Bos_taurus_delta/gamma       | LYRNS-----KTHWNKTIHGLIYNALK  | 449 |
| gi Mus_musculus_delta/gamma     | LYRNS-----KTHWNKTIHGLIYNALK  | 452 |
| gi Rattus_norvegicus_delta/gam  | LYRNS-----KTHWNKTIHGLIYNALK  | 518 |
| gi Danio_rerio_gamma            | LYRNS-----KTHWNKTIHGLIYNALK  | 395 |
| gi Danio_rerio_delta/gamma      | LYRNS-----KTHWNKTIHGLIYNALK  | 448 |
| gi Xenopus_laevis_delta/gamma   | LYRNS-----KTHWNKTIHGLIYNALK  | 448 |
| gi Xenopus_laevis_gamma         | LYRNS-----KTHWNKTIHGLIYNALK  | 448 |
| gi Xenopus_tropicalis_delta/ga  | LYRNS-----KTHWNKTIHGLIYNALK  | 448 |
| gi Mus_musculus_delta           | LYRNS-----KSHWNKTIHGLIYNALK  | 463 |
| gi Rattus_norvegicus_delta      | LYRNS-----KSHWNKTIHGLIYNALK  | 491 |
| gi Felis_catus_delta            | LYRNS-----KSHWNKTIHGLIYNALK  | 477 |
| gi Bos_taurus_delta             | LYRNS-----KSHWNKTIHGLIYNALK  | 469 |
| gi Canis_lupus_familiaris_delt  | LYRNS-----KSHWNKTIHGLIYNALK  | 464 |
| gi Macaca_mulatta_delta         | LYRNS-----KSHWNKTIHGLIYNALK  | 480 |
| gi Homo_sapiens_delta           | LYRNS-----KSHWNKTIHGLIYNALK  | 471 |
| gi Ovis_aries_delta             | LYRNS-----KSHWNKTIHGLIYNALK  | 468 |
| gi Falco_peregrinus_delta       | LYKNS-----KSHWNKTIHGLIYNALK  | 371 |
| gi Gallus_gallus_delta          | LYKNS-----KSHWNKTIHGLIYNALK  | 466 |
| gi Alligator_mississippiensis_  | LYKNS-----KSHWNKTIHGLIYNALK  | 465 |
| gi Chrysemys_picta_bellii_delt  | LYKNS-----KSHWNKTIHGLIYNALK  | 467 |
| gi Danio_rerio_delta            | LYKNS-----KSHWNKTIHGLIYNALK  | 458 |
| gi Ambystoma_mexicanum_delta    | LYKNS-----KSHWNKTIHGLIYNALK  | 320 |
| gi Petromyzon_marinus_S4RN43    | LYRNS-----KSHWNKTIHGLIYNALK  | 448 |
| jgi Branchiostoma_floridiae_237 | LYKNS-----KTHWNKTIHGLIYNALK  | 368 |
| jgi Branchiostoma_floridiae_252 | LYKNS-----KTHWNKTIHGLIYNALK  | 412 |
| gi Strongylocentrotus_purpurat  | LYKNS-----KAHWNKTIHGLIYNALK  | 429 |
| gi Caenorhabditis_elegans_PPTR  | LFKNS-----KSHWNKTIHGLIYNALK  | 416 |
| gi Hydra_vulgaris_delta         | LYRNS-----KTHWNKTIHGLIYNALK  | 438 |
| gi Amphimedon_queenslandica_de  | LLRHS-----KQHWNKTIHGLIYNALK  | 479 |
| gi>Drosophila_melanogaster_B56  | LNRNS-----KTHWNKNIHGLIYNALK  | 552 |
| gi Dictyostelium_discoideum_ps  | LHENS-----ISHWNRSIRNLSISSLK  | 479 |
| gi Dictyostelium_purpureum_N/A  | LYENS-----IGHWNKSIRNLSISSLK  | 436 |
| gi Dictyostelium_fasciculatum_  | LHDNA-----NNHWNKTIHGLIYNALK  | 450 |
| gi Polysphondylium_pallidum_N/  | LYENS-----NNHWNKSIRSLSFSSLK  | 420 |
| gi Arabidopsis_thaliana_theta   | LERNT-----QKHWNQAVHSLTLNVQK  | 442 |
| gi Arabidopsis_thaliana_eta     | LERNA-----QKHWNQAVHSLTLNVRK  | 482 |
| gi Arabidopsis_thaliana_zeta    | LERNT-----RGHWNQAVQSLTINVRK  | 472 |
| gi Arabidopsis_thaliana_gamma   | MERNT-----RGHWNQAVQSLTLNVRK  | 451 |

Figure S1. Cont.

|    |                                |                                                     |     |
|----|--------------------------------|-----------------------------------------------------|-----|
| gi | Oryza                          | LEKNV-----IEHWNQAVKSLSLNVQK                         | 452 |
| gi | Oryza_sativa_zeta              | LERNA-----NGHWNQAVQSLTLNVVK                         | 452 |
| gi | Oryza_sativa_theta             | IERNT-----KEHWNQAVQSLSLNVVK                         | 456 |
| gi | Oryza_sativa_eta               | LERNA-----RGHWNQAVRSLTLNVVK                         | 445 |
| gi | Arabidopsis_thaliana_delta     | LEKNG-----SSHWNQAVKSLTENVLK                         | 430 |
| gi | Arabidopsis_thaliana_N/A       | LEKNA-----QNHWNQSVLNLTLNVVK                         | 436 |
| gi | Oryza_sativa_kappa             | LEHNS-----QNHWNQAVLNLTDNVKK                         | 442 |
| gi | Oryza_sativa_N/A               | LERN-----RHHWNQSVLNLTMNVVK                          | 423 |
| gi | Arabidopsis_thaliana_alpha     | LEKNI-----ESHWNQAVHGLSANIKR                         | 441 |
| gi | Arabidopsis_thaliana_beta      | LEKNI-----QSHWNQAVHGLT'NIKK                         | 441 |
| gi | Oryza_sativa_N/A_2             | LERN-----TSHWNQAVHGLTANVVK                          | 481 |
| gi | Arabidopsis_thaliana_epsilon   | LERN-----KGHWNQAVHGLSENVRR                          | 450 |
| gi | Chlamydomonas_reinhardtii_w    | LEENT-----NSHWNQAVHGLTCNVVK                         | 439 |
| gi | Schizosaccharomyces_pombe_P    | LFEIS-----KSHWNRVIHSMVCNVLK                         | 474 |
| gi | Schizosaccharomyces_pombe_P    | LYKTA-----NEHWNSTIQAIACNVLQ                         | 575 |
| gi | Ashbya_gossypii_RTS1           | LYELTSQDLDLSDTDEEGNPNQDPYMLVEQAINSGSWNRRAIHAMAFKALK | 565 |
| gi | Saccharomyces_cerevisiae_RT    | LYELTSQLELDTANGED--SISDPYMLVEQAINSGSWNRRAIHAMAFKALK | 670 |
|    |                                |                                                     |     |
| gi | Aspergillus_niger_N/A          | MFMEINPQLFDECSHEYNERQNS-----                        | 551 |
| gi | Aspergillus_nidulans_para      | MFMEINPQLFDECSHEYNERQNS-----                        | 553 |
| gi | Mus_musculus_alpha             | TLMEMNGKLFDDLTSSYKAERQR-----                        | 443 |
| gi | Rattus_norvegicus_alpha        | TLMEMNGKLFDDLTSSYKAERQR-----                        | 443 |
| gi | Macaca_mulatta_alpha           | TLMEMNGKLFDDLTSSYKAERQR-----                        | 443 |
| gi | Homo_sapiens_alpha             | TLMEMNGKLFDDLTSSYKAERQR-----                        | 443 |
| gi | Ovis_aries_alpha               | TLMEMNGKLFDDLTSSYKAERQR-----                        | 446 |
| gi | Bos_taurus_alpha               | TLMEMNGKLFDDLTSSYKAERQR-----                        | 446 |
| gi | Felis_catus_alpha              | TLMEMNGKLFDDLTSSYKAERQR-----                        | 359 |
| gi | Canis_lupus_familiaris_alpha   | TLMEMNGKLFDDLTSSYKAERQR-----                        | 359 |
| gi | Falco_peregrinus_alpha         | TLMEMNGKLFDELTSSYKAERQR-----                        | 433 |
| gi | Gallus_gallus_alpha            | TLMEMNGKLFDELTSSYKAERQR-----                        | 433 |
| gi | Alligator_mississippiensis     | TLMEMNGKLFDELTSTYKAERQR-----                        | 443 |
| gi | Chrysemys_picta_bellii_alpha   | TLMEMNGKLFDELTSSYKAERQR-----                        | 433 |
| gi | Xenopus_laevis_alpha           | TLMEMNGKLFDELTGSYKAERQR-----                        | 432 |
| gi | Xenopus_tropicalis_alpha       | TLMEMNGKLFDELTGSYKAERQR-----                        | 432 |
| gi | Ambystoma_mexicanum_alpha      | TLMEMNGKLFDELTGSYKAERQR-----                        | 359 |
| gi | Danio_rerio_alpha              | TFMEMNSKLFDELTTSYKSDRQR-----                        | 435 |
| gi | Petromyzon_marinus_S4RHV1      | TFMDMNCLEFDELTSYNNERQR-----                         | 433 |
| gi | Mus_musculus_epsilon           | AFMEMNSTMFDELTATYKSDRQR-----                        | 435 |
| gi | Rattus_norvegicus_epsilon      | AFMEMNSTMFDELTATYKSDRQR-----                        | 435 |
| gi | Macaca_mulatta_epsilon         | AFMEMNSTMFDELTATYKSDRQR-----                        | 435 |
| gi | Homo_sapiens_epsilon           | AFMEMNSTMFDELTATYKSDRQR-----                        | 435 |
| gi | Ovis_aries_epsilon             | AFMEMNSTMFDELTATYKSDRQR-----                        | 435 |
| gi | Bos_taurus_epsilon             | AFMEMNSTMFDELTATYKSDRQR-----                        | 435 |
| gi | Canis_lupus_familiaris_epsilon | AFMEMNSTMFDELTATYKSDRQR-----                        | 435 |
| gi | Falco_peregrinus_epsilon       | AFMEMNSTMFDELTATYKSDRQR-----                        | 435 |
| gi | Gallus_gallus_epsilon          | AFMEMNSTMFDELTATYKSDRQR-----                        | 435 |
| gi | Felis_catus_epsilon            | AFMEMNSTMFDELTATYKSDRQR-----                        | 435 |
| gi | Chrysemys_picta_bellii_epsilon | AFMEMNSTMFDELTATYN-----                             | 430 |
| gi | Xenopus_laevis_epsilon         | AFMEMNSTLFDELTATYKSDRQR-----                        | 435 |
| gi | Xenopus_tropicalis_epsilon     | AFMEMNSTLFDELTATYN-----                             | 430 |
| gi | Alligator_mississippiensis     | AFMEMNSTMFDELTATYKSDRQRRLSKAAGEKNEETSGTPRLSRAFCVTQ  | 451 |
| gi | Ambystoma_mexicanum_epsilon    | AFMEMNSTLFDELTATYKSDRQR-----                        | 431 |
| gi | Danio_rerio_epsilon            | AFMEMNSALFDELAASYKSDRQR-----                        | 435 |
| gi | Mus_musculus_beta              | TFMEMNGKLFDELTASYKLEKQQ-----                        | 449 |
| gi | Rattus_norvegicus_beta         | TFMEMNGKLFDELTASYKLEKQQ-----                        | 449 |
| gi | Felis_catus_beta               | TFMEMNGKLFDELTASYKLEKQQ-----                        | 449 |
| gi | Canis_lupus_familiaris_beta    | TFMEMNGKLFDELTASYKLEKQQ-----                        | 449 |
| gi | Homo_sapiens_beta              | TFMEMNGKLFDELTASYKLEKQQ-----                        | 449 |
| gi | Bos_taurus_beta                | TFMEMNGKLFDELTASYKLEKQQ-----                        | 449 |
| gi | Ovis_aries_beta                | TFMEMNGKLFDELTASYKLEKQQ-----                        | 449 |

Figure S1. Cont.



|                                |                               |     |
|--------------------------------|-------------------------------|-----|
| gi Macaca_mulatta_beta         | TFMEMNGKLFDELTAASYKLEKQQ----- | 413 |
| gi Xenopus_laevis_beta         | TFMEMNGKLFDELTAASYKLDRQQ----- | 55  |
| gi Alligator_mississippiensis  | TFMEMNGKLFDELTAASYKLEKQQ----- | 449 |
| gi Chrysemys_picta_bellii_beta | TFMEMNGKLFDELTAASYKVEKQQ----- | 449 |
| gi Xenopus_tropicalis_beta     | TFMEMNGKLFDELTAASYKLDRQQ----- | 447 |
| gi Danio_rerio_beta            | TFMEMNSKLFDDLTASYKVEKQK-----  | 448 |
| gi Ambystoma_mexicanum_beta    | TFMEMNSTLFDELTAASYKVEKQQ----- | 318 |
| gi Petromyzon_marinus_S4RGA7   | TFMEMNSKLFDELTAASYKAERQR----- | 212 |
| gi Strongylocentrotus_purpurat | TLMEMNSKLFDELTTASYKADRQK----- | 431 |
| gi Drosophila_melanogaster_wdb | TFMEMNSKLFDELTTSSYKAERQK----- | 430 |
| jgi Branchiostoma_floridae_237 | TFMEMNSKLFDELTAANYKAERQK----- | 386 |
| gi Hydra_vulgaris_alpha        | SFMEMNSKLFDDLTASYKADRQK-----  | 439 |
| jgi Branchiostoma_floridae_112 | -----                         |     |
| jgi Branchiostoma_floridae_284 | TFMEMNSKLFDELTAASYKADRQK----- | 399 |
| gi Caenorhabditis_elegans_PPTR | TFMEMNGKLFDELTTSTYKGERLR----- | 460 |
| gi Amphimedon_queenslandica_be | AMTAMNPKLFDQLLDSYKAEKQK-----  | 453 |
| gi Chrysemys_picta_bellii_gamm | LFMEMNQKLFDDCTQQFKAEEKLK----- | 418 |
| gi Chrysemys_picta_bellii_delt | LFMEMNQKLFDDCTQQFKAEEKLK----- | 343 |
| gi Falco_peregrinus_gamma      | LFMEMNQKLFDDCTQQFKAEEKLK----- | 418 |
| gi Falco_peregrinus_delta/gamm | LFMEMNQKLFDDCTQQFKAEEKLK----- | 343 |
| gi Gallus_gallus_gamma         | LFMEMNQKLFDDCTQQFKAEEKLK----- | 418 |
| gi Alligator_mississippiensis  | LFMEMNQKLFDDCTQQFKAEEKLK----- | 418 |
| gi Alligator_mississippiensis  | LFMEMNQKLFDDCTQQFKAEEKLK----- | 343 |
| gi Ambystoma_mexicanum_gamma   | LFMEMNQKLFDDCTQQFKAEEKQK----- | 419 |
| gi Mus_musculus_gamma          | LFMEMNQKLFDDCTQQFKAEEKLK----- | 418 |
| gi Rattus_norvegicus_gamma     | LFMEMNQKLFDDCTQQFKAEEKLK----- | 418 |
| gi Ovis_aries_gamma            | LFMEMNQKLFDDCTQQFKAEEKLK----- | 418 |
| gi Bos_taurus_gamma            | LFMEMNQKLFDDCTQQFKAEEKLK----- | 418 |
| gi Canis_lupus_familiaris_gamm | LFMEMNQKLFDDCTQQFKAEEKLK----- | 418 |
| gi Macaca_mulatta_gamma        | LFMEMNQKLFDDCTQQFKAEEKLK----- | 418 |
| gi Homo_sapiens_gamma          | LFMEMNQKLFDDCTQQFKAEEKLK----- | 408 |
| gi Felis_catus_gamma           | LFMEMNQKLFDDCTQQFKAEEKLK----- | 465 |
| gi Canis_lupus_familiaris_delt | LFMEMNQKLFDDCTQQFKAEEKLK----- | 465 |
| gi Macaca_mulatta_delta/gamma  | LFMEMNQKLFDDCTQQFKAEEKLK----- | 700 |
| gi Bos_taurus_delta/gamma      | LFMEMNQKLFDDCTQQFKAEEKLK----- | 472 |
| gi Mus_musculus_delta/gamma    | LFMEMNQKLFDDCTQQFKAEEKLK----- | 475 |
| gi Rattus_norvegicus_delta/gam | LFMEMNQKLFDDCTQQFKAEEKLK----- | 541 |
| gi Danio_rerio_gamma           | LFMEMNQKLFDDCTQQFKAEEKNK----- | 418 |
| gi Danio_rerio_delta/gamma     | LFMEMNQKLFDDCTQQFKAEEKNK----- | 471 |
| gi Xenopus_laevis_delta/gamma  | LFMEMNQKLFDDCTQQFKAEEKQK----- | 471 |
| gi Xenopus_laevis_gamma        | LFMEMNQKLFDDCTQQFKAEEKQK----- | 471 |
| gi Xenopus_tropicalis_delta/ga | LFMEMNQKLFDDCTQQFKAEEKQK----- | 471 |
| gi Mus_musculus_delta          | LFMEMNQKLFDDCTQQYKAEKQK-----  | 486 |
| gi Rattus_norvegicus_delta     | LFMEMNQKLFDDCTQQYKAEKQK-----  | 514 |
| gi Felis_catus_delta           | LFMEMNQKLFDDCTQQYKAEKQK-----  | 500 |
| gi Bos_taurus_delta            | LFMEMNQKLFDDCTQQYKAEKQK-----  | 492 |
| gi Canis_lupus_familiaris_delt | LFMEMNQKLFDDCTQQYKAEKQK-----  | 487 |
| gi Macaca_mulatta_delta        | LFMEMNQKLFDDCTQQYKAEKQK-----  | 503 |
| gi Homo_sapiens_delta          | LFMEMNQKLFDDCTQQYKAEKQK-----  | 494 |
| gi Ovis_aries_delta            | LFMEMNQKLFDDCTQQYKAEKQK-----  | 491 |
| gi Falco_peregrinus_delta      | LFMEMNQKLFDDCTQQYKAEKQK-----  | 394 |
| gi Gallus_gallus_delta         | LFMEMNQKLFDDCTQQYKAEKQK-----  | 489 |
| gi Alligator_mississippiensis  | LFMEMNQKLFDDCTQQYKAEKQK-----  | 488 |
| gi Chrysemys_picta_bellii_delt | LFMEMNQKLFDDCTQQYKAEKQK-----  | 490 |
| gi Danio_rerio_delta           | LFMEMNQKLFDDCTQQYKAEKQK-----  | 481 |
| gi Ambystoma_mexicanum_delta   | LFMEMNQKLFDDCTQQYKAEKQK-----  | 343 |
| gi Petromyzon_marinus_S4RN43   | LFMEMNQKLFDDCTQQYKAERQK-----  | 471 |
| jgi Branchiostoma_floridae_237 | LFMEMNQKLFDDCTQRYKAERQK-----  | 391 |
| jgi Branchiostoma_floridae_252 | LFMEMNQKLFDDCTQRYKAERQK-----  | 435 |
| gi Strongylocentrotus_purpurat | LFMEINQKRFDDCMQKYKDERQQ-----  | 452 |
| gi Caenorhabditis_elegans_PPTR | MFMEMNQKLFDECSQAYQKDRVQ-----  | 439 |

Figure S1. Cont.

|                                 |                                       |     |
|---------------------------------|---------------------------------------|-----|
| gi Hydra_vulgaris_delta         | LLMEMNQKLFQCAQQYNFQIE-----            | 460 |
| gi Amphimedon_queenslandica_de  | IFAEMNQKLFDECSDFKKEELEQ-----          | 502 |
| gi Drosophila_melanogaster_B56  | LFMEIDQRLFDECSKNYQEKQM-----           | 575 |
| gi Dictyostelium_discoideum_ps  | LFMEIDMDLFNKISEKYKESKKK-----          | 502 |
| gi Dictyostelium_purpureum_N/A  | LFMEIDIDLFNKVSEKYKETKKK-----          | 459 |
| gi Dictyostelium_fasciculatum   | LFMEIDLETFNSISCKVMEERA-----           | 473 |
| gi Polysphondylium_pallidum_N/  | LFMDIDVETFNRI SDQYKE-----             | 439 |
| gi Arabidopsis_thaliana_theta   | IFNDIDAELFKDCLAKFREDESK-----          | 465 |
| gi Arabidopsis_thaliana_eta     | IFHDLDPFLFKDECLAKFREDESK-----         | 505 |
| gi Arabidopsis_thaliana_zeta    | VLCEIDQVLFDECLAKFQVEEVN-----          | 495 |
| gi Arabidopsis_thaliana_gamma   | VMAETDQILFDECLAKFQDEAN-----           | 474 |
| gi Oryza                        | LFSDRDPELYKECLRKYEENKAK-----          | 475 |
| gi Oryza_sativa_zeta            | LFSDHDVGVDQCKRYEDEKAK-----            | 475 |
| gi Oryza_sativa_theta           | IFMDHDPVLFEECLKKFEDEAK-----           | 479 |
| gi Oryza_sativa_eta             | IFSDHDSAFFGECTQKFNDDELK-----          | 468 |
| gi Arabidopsis_thaliana_delta   | VLSDTNPDLFEECLHKFQEDQQK-----          | 453 |
| gi Arabidopsis_thaliana_N/A     | MFCEMDEALFMSCHARFKEDEAK-----          | 459 |
| gi Oryza_sativa_kappa           | MFSEMDDVLFSACLVKYKEDEER-----          | 465 |
| gi Oryza_sativa_N/A             | MFLEMDEGLLLTCQRNFQEEEEK-----          | 446 |
| gi Arabidopsis_thaliana_alpha   | MFMEMDPFLFEECQQQYEEKQAK-----          | 464 |
| gi Arabidopsis_thaliana_beta    | MFMEMDPFLFEECQRQYEEKQAK-----          | 464 |
| gi Oryza_sativa_N/A_2           | MFLDMDSELFEECQQQYIEKQAR-----          | 504 |
| gi Arabidopsis_thaliana_epsilon | MFLEMDTELFECECKQYLENEAK-----          | 473 |
| gi Chlamydomonas_reinhardtii_w  | MFQELDEALYEECKRKYEEEQTS-----          | 462 |
| gi Schizosaccharomyces_pombe_P  | LFMDINPSLFDEVDAAEYSESRRK-----         | 497 |
| gi Schizosaccharomyces_pombe_P  | IFVMDADFFNGLVEDYKQAI IK-----          | 598 |
| gi Ashbya_gossypii_RTS1         | IFLETNPVLYENCNSLYLSSLKE-----          | 588 |
| gi Saccharomyces_cerevisiae_RT  | IFLETNPVLYENCNALYLSSVKE-----          | 693 |
|                                 |                                       |     |
| gi Aspergillus_niger_N/A        | -----AEERELGRQQRWEKVLERAKDRKNGVTVP--  | 581 |
| gi Aspergillus_nidulans_parA    | -----AEMREKARQNRWEKVAERAMQRQNGVNLPR-- | 583 |
| gi Mus_musculus_alpha           | -----EKKKELEEREELWKKLEELQLK-----      | 464 |
| gi Rattus_norvegicus_alpha      | -----EKKKELEEREELWKKLEELKLK-----      | 464 |
| gi Macaca_mulatta_alpha         | -----EKKKELEEREELWKKLEELKLK-----      | 464 |
| gi Homo_sapiens_alpha           | -----EKKKELEEREELWKKLEELKLK-----      | 464 |
| gi Ovis_aries_alpha             | -----EKKKELEEREELWKKLEELKLK-----      | 467 |
| gi Bos_taurus_alpha             | -----EKKKELEEREELWKKLEELKLK-----      | 467 |
| gi Felis_catus_alpha            | -----EKKKELEEREELWKKLEELKLK-----      | 380 |
| gi Canis_lupus_familiaris_alph  | -----EKKKELEEREELWKKLEELKLK-----      | 380 |
| gi Falco_peregrinus_alpha       | -----EKKKELEEREELWRKLEELKLK-----      | 454 |
| gi Gallus_gallus_alpha          | -----EKKKELEEREELWRKLEELKLK-----      | 454 |
| gi Alligator_mississippiensis   | -----EKKKELEEREELWRKLEELKLK-----      | 464 |
| gi Chrysemys_picta_bellii_alph  | -----EKKKELEEREELWRKLEELKLK-----      | 454 |
| gi Xenopus_laevis_alpha         | -----EKKKELEEREELWRRLLDLLLLK-----     | 453 |
| gi Xenopus_tropicalis_alpha     | -----EKKKELEEREELWRRLLDLLLLK-----     | 453 |
| gi Ambystoma_mexicanum_alpha    | -----EKKKELEEREELWRKLLDCLKL-----      | 380 |
| gi Danio_rerio_alpha            | -----EKKKEQEREELWRRLLDELRLMK-----     | 456 |
| gi Petromyzon_marinus_S4RHV1    | -----EKKKEEREELWKKLEDLELK-----        | 454 |
| gi Mus_musculus_epsilon         | -----EKKKEKEREELWKKLEDLELK-----       | 456 |
| gi Rattus_norvegicus_epsilon    | -----EKKKEKEREELWKKLEDLELK-----       | 456 |
| gi Macaca_mulatta_epsilon       | -----EKKKEKEREELWKKLEDLELK-----       | 456 |
| gi Homo_sapiens_epsilon         | -----EKKKEKEREELWKKLEDLELK-----       | 456 |
| gi Ovis_arie_epsilon            | -----EKKKEKEREELWKKLEDLELK-----       | 456 |
| gi Bos_taurus_epsilon           | -----EKKKEKEREELWKKLEDLELK-----       | 456 |
| gi Canis_lupus_familiaris_epsi  | -----EKKKEKEREELWKKLEDLELK-----       | 456 |
| gi Falco_peregrinus_epsilon     | -----EKKKEKEREELWKKLEDLELK-----       | 456 |
| gi Gallus_gallus_epsilon        | -----EKKKEKEREELWKKLEDLELK-----       | 456 |
| gi Felis_catus_epsilon          | -----EKKKEKEREELWKKLEDLELK-----       | 456 |
| gi Chrysemys_picta_bellii_epsi  | -----EKKKEKEREELWKKLEDLELK-----       | 451 |
| gi Xenopus_laevis_epsilon       | -----EKKKEKEREELWKKLEDLELK-----       | 456 |

Figure S1. Cont.

|     |                             |                                              |     |
|-----|-----------------------------|----------------------------------------------|-----|
| gi  | Xenopus tropicalis_epsilon  | -----EKKKEKEREELWKKLEDELELK-----             | 451 |
| gi  | Alligator_mississippiensis_ | GSHKQSEGYCMSSNLVSEKKKEKEREELWKKLEDELELK----- | 489 |
| gi  | Ambystoma_mexicanum_epsilon | -----                                        |     |
| gi  | Danio_rerio_epsilon         | -----ERKKDKEREDLWRKLEDELELR-----             | 456 |
| gi  | Mus_musculus_beta           | -----EQQKAQERQELWQGLEELRLR-----              | 470 |
| gi  | Rattus_norvegicus_beta      | -----EQQKAQERQELWQGLEELRLR-----              | 470 |
| gi  | Felis_catus_beta            | -----EQQKARERQELWQGLEELRLR-----              | 470 |
| gi  | Canis_lupus_familiaris_beta | -----EQQKARERQELWQGLEELRLR-----              | 470 |
| gi  | Homo_sapiens_beta           | -----EQQKAQERQELWQGLEELRLR-----              | 470 |
| gi  | Bos_taurus_beta             | -----EQQKARERQELWQGLEELRLR-----              | 470 |
| gi  | Ovis_aries_beta             | -----EQQKARERQELWQGLEELRLR-----              | 470 |
| gi  | Macaca_mulatta_beta         | -----EQQKAQERQELWQGLEELRLR-----              | 434 |
| gi  | Xenopus_laevis_beta         | -----                                        |     |
| gi  | Alligator_mississippiensis_ | -----ELKKEKERQELWRQDELRLR-----               | 470 |
| gi  | Chrysemys_picta_bellii_beta | -----ELKKEKERQELWKQDELQOLK-----              | 470 |
| gi  | Xenopus_tropicalis_beta     | -----EMKREKERQELWRKLDLRLK-----               | 468 |
| gi  | Danio_rerio_beta            | -----ELKKERERVELWRNLEDLRER-----              | 469 |
| gi  | Ambystoma_mexicanum_beta    | -----ELKKEKERQELWKKLDDLQLR-----              | 339 |
| gi  | Petromyzon_marinus_S4RGA7   | -----ERKREKEREDLWQRLLEELQLQ-----             | 233 |
| gi  | Strongylocentrotus_purpurat | -----EKKKEKERDELWKRLSKLEMN-----              | 452 |
| gi  | Drosophila_melanogaster_wdb | -----EKKRERDREELWKKLHELESNRRSSGRTAGGSAT      | 463 |
| jgi | Branchiostoma_floridae_237  | -----ERKKEKEREELWKKLDGLEIN-----              | 407 |
| gi  | Hydra_vulgaris_alpha        | -----EKKKERDRDDLWKRDLKLE-----                | 460 |
| jgi | Branchiostoma_floridae_112  | -----                                        |     |
| jgi | Branchiostoma_floridae_284  | -----EKKKEKEREELWKQLDKLEIS-----              | 420 |
| gi  | Caenorhabditis_elegans_PPTR | -----EKQREKDRDAFWKKMEALELN-----              | 481 |
| gi  | Amphimedon_queenslandica_be | -----ELKKGKDRNELWKQLDRLKLE-----              | 474 |
| gi  | Chrysemys_picta_bellii_gamm | -----EKLKSKEREAEAWVKIENLAKSNPQYPTYSSTSV      | 451 |
| gi  | Chrysemys_picta_bellii_delt | -----EKLKSKEREAEAWVKIENLAKSNPQYPTYSSTSV      | 376 |
| gi  | Falco_peregrinus_gamma      | -----EKLKSKEREAEAWVKIENLAKSNPQYPTYSSTSL      | 451 |
| gi  | Falco_peregrinus_delta/gamm | -----EKLKSKEREAEAWVKIENLAKSNPQYPTYSSTSL      | 376 |
| gi  | Gallus_gallus_gamma         | -----EKLKLKEREAEAWVKIENLAKSNPQYPTYSSTSL      | 451 |
| gi  | Alligator_mississippiensis_ | -----EKLKLKEREAEAWVKIENLAKSNPQYPTYSSTSV      | 451 |
| gi  | Alligator_mississippiensis_ | -----EKLKLKEREAEAWVKIENLAKSNPQYPTYSSTSV      | 376 |
| gi  | Ambystoma_mexicanum_gamma   | -----EKLKLKEREAEAWVKIENLAKSNPKYSMPDNST       | 452 |
| gi  | Mus_musculus_gamma          | -----EKLKMKEREAEAWVKIENLAKANPQYAVYSQASA      | 451 |
| gi  | Rattus_norvegicus_gamma     | -----EKLKMKEREAEAWVKIENLAKANPQYAVYSQASA      | 451 |
| gi  | Ovis_aries_gamma            | -----EKLKMKEREAEAWVKIENLAKANP-----           | 441 |
| gi  | Bos_taurus_gamma            | -----EKLKMKEREAEAWVKIENLAKANPQYAVYSQAST      | 451 |
| gi  | Canis_lupus_familiaris_gamm | -----EKLKMKEREAEAWVKIENLAKANPQYAVYSQAST      | 451 |
| gi  | Macaca_mulatta_gamma        | -----EKLKMKEREAEAWVKIENLAKANPQYTVYSQAST      | 451 |
| gi  | Homo_sapiens_gamma          | -----EKLKMKEREAEAWVKIENLAKANPQYTVYSQAST      | 441 |
| gi  | Felis_catus_gamma           | -----EKLKMKEREAEAWVKIENLAKANP-----           | 488 |
| gi  | Canis_lupus_familiaris_delt | -----EKLKMKEREAEAWVKIENLAKANPQYAVYSQAST      | 498 |
| gi  | Macaca_mulatta_delta/gamma  | -----EKLKMKEREAEAWVKIENLAKANPQYTVYSQAST      | 733 |
| gi  | Bos_taurus_delta/gamma      | -----EKLKMKEREAEAWVKIENLAKANPQYAVYSQAST      | 505 |
| gi  | Mus_musculus_delta/gamma    | -----EKLKMKEREAEAWVKIENLAKANPQYAVYSQASA      | 508 |
| gi  | Rattus_norvegicus_delta/gam | -----EKLKMKEREAEAWVKIENLAKANPQYAVYSQASA      | 574 |
| gi  | Danio_rerio_gamma           | -----EKAKWKEREAEAWIKIENLAKSNPQFLMYIDANS      | 451 |
| gi  | Danio_rerio_delta/gamma     | -----EKAKWKEREAEAWIKIENLAKSNPQFLMYIDANS      | 504 |
| gi  | Xenopus_laevis_delta/gamma  | -----EKLKLKEREAEAWVKIENLAKSNAQSCCNRWA        | 504 |
| gi  | Xenopus_laevis_gamma        | -----EKLKLKEREAEAWVKIENLAKSNAQSCCNRWA        | 504 |
| gi  | Xenopus_tropicalis_delta/ga | -----EKLKLKEREAEAWIKIENLAKSNPQYPMYTDTS       | 504 |
| gi  | Mus_musculus_delta          | -----GRFRMKEREEMWQKIEELARLNPQYPMFRAPPP       | 519 |
| gi  | Rattus_norvegicus_delta     | -----GRFRMKEREEMWQKIEELARLNPQYPMFRAPPP       | 547 |
| gi  | Felis_catus_delta           | -----GRFRMKEREEMWQKIEELARLNPQYPMFRAPPP       | 533 |
| gi  | Bos_taurus_delta            | -----GRFRMKEREEMWQKIEELARLNPQYPMFRAPPP       | 525 |
| gi  | Canis_lupus_familiaris_delt | -----GRFRMKEREEMWQKIEELARLNPQYPMFRAPPP       | 520 |
| gi  | Macaca_mulatta_delta        | -----GRFRMKEREEMWQKIEELARLNPQYPMFRAPPP       | 536 |
| gi  | Homo_sapiens_delta          | -----GRFRMKEREEMWQKIEELARLNPQYPMFRAPPP       | 527 |
| gi  | Ovis_aries_delta            | -----GRFRMKEREEMWQKIEELARLNPQYPMFRAPPP       | 524 |

Figure S1. Cont.

|                                 |                                          |     |
|---------------------------------|------------------------------------------|-----|
| gi Falco_peregrinus_delta       | -----GRFRMKEREEMWQKIEELARLNPOYPMYAPP     | 427 |
| gi Gallus_gallus_delta          | -----GRFRMKEREEMWQKIEELARLNPOYPMYAPPS    | 522 |
| gi Alligator_mississippiensis_  | -----GRFRMKERVEMWQKIEELARLNPOYPMYAPP     | 521 |
| gi Chrysemys_picta_bellii_delt  | -----GRFKLREEREEMWHKVEELARQNPOYPMYAPP    | 523 |
| gi Danio_rerio_delta            | -----EKYKVKEREEMWHKIEALAKQNPQSTKVQLRPG   | 514 |
| gi Ambystoma_mexicanum_delta    | -----GKFKVKEREEMWHKIEELARLN-----         | 366 |
| gi Petromyzon_marinus_S4RN43    | -----QARGQVRGGSCRTQMSTLARCDPAQDLNG----   | 500 |
| jgi Branchiostoma_floridae_237  | -----EKEKVREREAAWDRIEHIAQTNPVMVSTANLGTC  | 424 |
| jgi Branchiostoma_floridae_252  | -----EKEKVREREAAWDRIEHIAQTNPVMVSTVNLGTC  | 468 |
| gi Strongylocentrotus_purpurat  | -----EKDKLLKMDEIWNKLEYKARSNP-----        | 475 |
| gi Caenorhabditis_elegans_PPTR  | -----EKTLENEEKERIWNNEIKQAMGNPOYYVEVKALFA | 472 |
| gi Hydra_vulgaris_delta         | -----                                    |     |
| gi Amphimedon_queenslandica_de  | -----EPKVVKKREDTWTALEKLALMSPHVSKLSSPQN   | 535 |
| gi Drosophila_melanogaster_B56  | -----EREKLSQREELWQQVESLAKTNPEWTKARRFND   | 608 |
| gi Dictyostelium_discoideum_ps  | -----QQQIQQ-REKFKQN-----APETQ            | 520 |
| gi Dictyostelium_purpureum_N/A  | -----QQQQQQQREKTRQN-----VDVS-            | 477 |
| gi Dictyostelium_fasciculatum   | -----KKRQQS IMEDQARLAHQQQQLQMQQHMQQQMQ   | 506 |
| gi Polysphondylium_pallidum_N/  | -----RKTNKI TEKKP-----Q                  | 452 |
| gi Arabidopsis_thaliana_theta   | -----EAE IGAKREATWKR-----                | 479 |
| gi Arabidopsis_thaliana_eta     | -----AAETEAKREATWKR-----                 | 519 |
| gi Arabidopsis_thaliana_zeta    | -----KTEVVKAKRETRWQR-----                | 509 |
| gi Arabidopsis_thaliana_gamma   | -----ETEVVAKREATWKL-----                 | 488 |
| gi>Oryza                        | -----EKDHKLKQESVWKR-----                 | 489 |
| gi Oryza_sativa_zeta            | -----EKETKLKQEVAWKR-----                 | 489 |
| gi Oryza_sativa_theta           | -----ETALRSKREATWKR-----                 | 493 |
| gi Oryza_sativa_eta             | -----QEESENSKREALWKR-----                | 482 |
| gi Arabidopsis_thaliana_delta   | -----AEDTKKKNGETWRQ-----                 | 467 |
| gi Arabidopsis_thaliana_N/A     | -----QCSAAEKKEVWAR-----                  | 473 |
| gi Oryza_sativa_kappa           | -----QASLESKRRLTWEK-----                 | 479 |
| gi Oryza_sativa_N/A             | -----RAASEERRKLIWEN-----                 | 460 |
| gi Arabidopsis_thaliana_alpha   | -----SKQVEEQQRNRR-----                   | 478 |
| gi Arabidopsis_thaliana_beta    | -----SKEVEEQRQYTWKR-----                 | 478 |
| gi Oryza_sativa_N/A_2           | -----AKDMEEQRLSAWRQ-----                 | 518 |
| gi Arabidopsis_thaliana_epsilon | -----ACELLEQRELTWKR-----                 | 487 |
| gi Chlamydomonas_reinhardtii_w  | -----ERAAMETDRKWEY-----                  | 476 |
| gi Schizosaccharomyces_pombe_P  | -----KEDEE IIREERWTILENIAKEN-----        | 519 |
| gi Schizosaccharomyces_pombe_P  | -----QEEVMI IRKQWCQIEALAAE-----          | 619 |
| gi Ashbya_gossypii_RTS1         | -----SQKRREKREENWNKLQEYVRN-----          | 609 |
| gi Saccharomyces_cerevisiae_RT  | -----TQQRKVQREENWSKLEEVKN-----           | 714 |
| gi Aspergillus_niger_N/A        | -----                                    |     |
| gi Aspergillus_nidulans_para    | -----                                    |     |
| gi Mus_musculus_alpha           | -----                                    |     |
| gi Rattus_norvegicus_alpha      | -----                                    |     |
| gi Macaca_mulatta_alpha         | -----                                    |     |
| gi Homo_sapiens_alpha           | -----                                    |     |
| gi Ovis_aries_alpha             | -----                                    |     |
| gi Bos_taurus_alpha             | -----                                    |     |
| gi Felis_catus_alpha            | -----                                    |     |
| gi Canis_lupus_familiaris_alph  | -----                                    |     |
| gi Falco_peregrinus_alpha       | -----                                    |     |
| gi Gallus_gallus_alpha          | -----                                    |     |
| gi Alligator_mississippiensis_  | -----                                    |     |
| gi Chrysemys_picta_bellii_alph  | -----                                    |     |
| gi Xenopus_laevis_alpha         | -----                                    |     |
| gi Xenopus_tropicalis_alpha     | -----                                    |     |
| gi Ambystoma_mexicanum_alpha    | -----                                    |     |
| gi Danio_rerio_alpha            | -----                                    |     |
| gi Petromyzon_marinus_S4RHV1    | -----                                    |     |
| gi Mus_musculus_epsilon         | -----                                    |     |

Figure S1. Cont.

|                                    |                                           |     |
|------------------------------------|-------------------------------------------|-----|
| gi Rattus_norvegicus_epsilon       | -----                                     |     |
| gi Macaca_mulatta_epsilon          | -----                                     |     |
| gi Homo_sapiens_epsilon            | -----                                     |     |
| gi Ovis_aries_epsilon              | -----                                     |     |
| gi Bos_taurus_epsilon              | -----                                     |     |
| gi Canis_lupus_familiaris_epsilon  | -----                                     |     |
| gi Falco_peregrinus_epsilon        | -----                                     |     |
| gi Gallus_gallus_epsilon           | -----                                     |     |
| gi Felis_catus_epsilon             | -----                                     |     |
| gi Chrysemys_picta_bellii_epsilon  | -----                                     |     |
| gi Xenopus_laevis_epsilon          | -----                                     |     |
| gi Xenopus_tropicalis_epsilon      | -----                                     |     |
| gi Alligator_mississippiensis      | -----                                     |     |
| gi Ambystoma_mexicanum_epsilon     | -----                                     |     |
| gi Danio_rerio_epsilon             | -----                                     |     |
| gi Mus_musculus_beta               | -----                                     |     |
| gi Rattus_norvegicus_beta          | -----                                     |     |
| gi Felis_catus_beta                | -----                                     |     |
| gi Canis_lupus_familiaris_beta     | -----                                     |     |
| gi Homo_sapiens_beta               | -----                                     |     |
| gi Bos_taurus_beta                 | -----                                     |     |
| gi Ovis_aries_beta                 | -----                                     |     |
| gi Macaca_mulatta_beta             | -----                                     |     |
| gi Xenopus_laevis_beta             | -----                                     |     |
| gi Alligator_mississippiensis_beta | -----                                     |     |
| gi Chrysemys_picta_bellii_beta     | -----                                     |     |
| gi Xenopus_tropicalis_beta         | -----                                     |     |
| gi Danio_rerio_beta                | -----                                     |     |
| gi Ambystoma_mexicanum_beta        | -----                                     |     |
| gi Petromyzon_marinus_S4RGA7       | -----                                     |     |
| gi Strongylocentrotus_purpurat     | -----                                     |     |
| gi Drosophila_melanogaster_wdb     | TSNSAASAASTSLQ-----                       | 477 |
| jgi Branchiostoma_floridae_237     | -----                                     |     |
| gi Hydra_vulgaris_alpha            | -----                                     |     |
| jgi Branchiostoma_floridae_112     | -----                                     |     |
| jgi Branchiostoma_floridae_284     | ---STANSKTVKAV-----                       | 431 |
| gi Caenorhabditis_elegans_PPTR     | ---PPAEGKEVTPS-----                       | 492 |
| gi Amphimedon_queenslandica_be     | -----                                     |     |
| gi Chrysemys_picta_bellii_gamm     | LN-----SPVAMETDGPLIEDLQMLKKTVKEEAC-----   | 480 |
| gi Chrysemys_picta_bellii_delt     | LN-----SPVAMETDGPLIEDLQMLKKTVKEEAC-----   | 405 |
| gi Falco_peregrinus_gamma          | LN-----SPVAMETDGPLIEDLQMLKKTVKEEAC-----   | 480 |
| gi Falco_peregrinus_delta/gamm     | LN-----SPVAMETDGPLIEDLQMLKKTVKEEAC-----   | 405 |
| gi Gallus_gallus_gamma             | LN-----SPVAMETDGPLIEDLQMLKKTVKEEAC-----   | 480 |
| gi Alligator_mississippiensis      | LN-----SPVAMETDGPLIEDLQMLKKTVKEEAC-----   | 480 |
| gi Alligator_mississippiensis      | LN-----SPVAMETDGPLIEDLQMLKKTVKEEAC-----   | 405 |
| gi Ambystoma_mexicanum_gamma       | FN-----SQIAMETDGPLIEDVQMLKKIVKEEAS-----   | 481 |
| gi Mus_musculus_gamma              | VS-----IPVAMETDGPQFEDVQMLKKTVSDEARQVKVGR  | 486 |
| gi Rattus_norvegicus_gamma         | MS-----IPVAMETDGPQFEDVQMLKKTVSDETR-----   | 480 |
| gi Ovis_aries_gamma                | -----QVLKKRVT-----                        | 449 |
| gi Bos_taurus_gamma                | IS-----IPVAMETDGPLFEDVQMLRKTVNEEAR-----   | 480 |
| gi Canis_lupus_familiaris_gamm     | MS-----IPVAMETDGPLFEDVQMLRKAVNEEAR-----   | 480 |
| gi Macaca_mulatta_gamma            | VS-----IPVAMETDGPLFEDVQMLRKTVKDEAH-----   | 480 |
| gi Homo_sapiens_gamma              | MS-----IPVAMETDGPLFEDVQMLRKTVKDEAH-----   | 470 |
| gi Felis_catus_gamma               | -----                                     |     |
| gi Canis_lupus_familiaris_delt     | MS-----IPVAMETDGPLFEDVQMLRKAVNEEA-----    | 526 |
| gi Macaca_mulatta_delta/gamma      | VS-----IPVAMETDGPLFEDVQMLRKTVKDEA-----    | 761 |
| gi Bos_taurus_delta/gamma          | IS-----IPVAMETDGPLFEDVQMLRKTVNEEA-----    | 533 |
| gi Mus_musculus_delta/gamma        | VS-----IPVAMETDGPQFEDVQMLKKTVSDEARQVKVGR  | 543 |
| gi Rattus_norvegicus_delta/gam     | MS-----IPVAMETDGPQFEDVQMLKKTVSDET-----    | 602 |
| gi Danio_rerio_gamma               | LC-----SPMDMETDGPMLLEDVLMMLKKTVEEEAT----- | 480 |
| gi Danio_rerio_delta/gamma         | LC-----SPMDMETDGPMLLEDVLMMLKKTVEEEAT----- | 533 |

Figure S1. Cont.

|     |                              |                                                    |     |
|-----|------------------------------|----------------------------------------------------|-----|
| gi  | Xenopus_laevis_delta/gamma   | LT-----                                            | 506 |
| gi  | Xenopus_laevis_gamma         | LT-----                                            | 506 |
| gi  | Xenopus_tropicalis_delta/ga  | LN-----SPVAMETDGPILLEDVQMLKKTVKEEAS-----           | 533 |
| gi  | Mus_musculus_delta           | LP-----PVYSMETETPTAEDIQLLKRTVETEAV-----            | 548 |
| gi  | Rattus_norvegicus_delta      | LP-----PVYSMETETPTAEDIQLLKRTVETEAV-----            | 576 |
| gi  | Felis_catus_delta            | LP-----PVYSMETETPTAEDIQLLKRTVETEAV-----            | 562 |
| gi  | Bos_taurus_delta             | LP-----PVYSMETETPTAEDIQLLKRTVETEAV-----            | 554 |
| gi  | Canis_lupus_familiaris_delt  | LP-----PVYSMETETPTAEDIQLLKRTVETEAV-----            | 549 |
| gi  | Macaca_mulatta_delta         | LP-----PVYSMETETPTAEDIQLLKRTVETEAV-----            | 565 |
| gi  | Homo_sapiens_delta           | LP-----PVYSMETETPTAEDIQLLKRTVETEAV-----            | 556 |
| gi  | Ovis_aries_delta             | LP-----PVYSMETETPTAEDIQLLKRTVETEAV-----            | 553 |
| gi  | Falco_peregrinus_delta       | LP-----SVCCMETETPTAEDIQLLKRTVETEAV-----            | 456 |
| gi  | Gallus_gallus_delta          | LP-----LVCCMETETPTAEDIQLLKRTVETEAV-----            | 551 |
| gi  | Alligator_mississippiensis   | LP-----PVYCMETETPTAEDIQLLKRTVETEAV-----            | 550 |
| gi  | Chrysemys_picta_bellii_delt  | LP-----PVYCMETETPTAEDIQLLKRTVETEAV-----            | 552 |
| gi  | Danio_rerio_delta            | LAQEEYMMYNEGGM---PIYSMETETPTVEDIQLLKRTVESEAS-----  | 555 |
| gi  | Ambystoma_mexicanum_delta    | -----                                              |     |
| gi  | Petromyzon_marinus_S4RN43    | -----AVVSMETGTPSSEDIMLLKKSMEETEAV-----             | 527 |
| jgi | Branchiostoma_floridiae_237  | SSCVGG-----SVAMETDANDDAELSLDKMNERG-----            | 453 |
| jgi | Branchiostoma_floridiae_252  | SSCVGCEW-----LSLPSLVLASLQMEFPFLRSCEVLTCCVV---      | 505 |
| gi  | Strongylocentrotus_purpurat  | -----LAAEGVPGGRKESKPLLR-----                       | 493 |
| gi  | Caenorhabditis_elegans_PPTR  | RFNPDEII-----SSRQQNGVDENMKTSTVLSKDEILKNAV-----     | 508 |
| gi  | Hydra_vulgaris_delta         | -----                                              |     |
| gi  | Amphimedon_queenslandica_de  | AFRKSMLSSLTSIASEEPTSPDGVPTSEELKSIPQTPPSSESGAS----- | 579 |
| gi  | Drosophila_melanogaster_B56  | CL-----PVSDSRALCDQYSENSDS-----                     | 628 |
| gi  | Dictyostelium_discoideum_ps  | KSKQINQNNNNNNNN-----                               | 535 |
| gi  | Dictyostelium_purpureum_N/A  | -FKQINQKE-----                                     | 485 |
| gi  | Dictyostelium_fasciculatum   | QQQQLQQQMQ-----                                    | 516 |
| gi  | Polysphondylium_pallidum_N/  | QPRPITSNIS-----                                    | 462 |
| gi  | Arabidopsis_thaliana_theta   | -----                                              |     |
| gi  | Arabidopsis_thaliana_eta     | -----                                              |     |
| gi  | Arabidopsis_thaliana_zeta    | -----                                              |     |
| gi  | Arabidopsis_thaliana_gamma   | -----                                              |     |
| gi  | Oryza                        | -----                                              |     |
| gi  | Oryza_sativa_zeta            | -----                                              |     |
| gi  | Oryza_sativa_theta           | -----                                              |     |
| gi  | Oryza_sativa_eta             | -----                                              |     |
| gi  | Arabidopsis_thaliana_delta   | -----                                              |     |
| gi  | Arabidopsis_thaliana_N/A     | -----                                              |     |
| gi  | Oryza_sativa_kappa           | -----                                              |     |
| gi  | Oryza_sativa_N/A             | -----                                              |     |
| gi  | Arabidopsis_thaliana_alpha   | -----                                              |     |
| gi  | Arabidopsis_thaliana_beta    | -----                                              |     |
| gi  | Oryza_sativa_N/A_2           | -----                                              |     |
| gi  | Arabidopsis_thaliana_epsilon | -----                                              |     |
| gi  | Chlamydomonas_reinhardtii_w  | -----                                              |     |
| gi  | Schizosaccharomyces_pombe_P  | -----                                              |     |
| gi  | Schizosaccharomyces_pombe_P  | -----                                              |     |
| gi  | Ashbya_gossypii_RTS1         | -----                                              |     |
| gi  | Saccharomyces_cerevisiae_RT  | -----                                              |     |
| gi  | Aspergillus_niger_N/A        | -----QCQVAEIPVHLDDIDQVAHESQKRLHALK-----            | 610 |
| gi  | Aspergillus_nidulans_para    | -----NSTTAEIPLQLDDVDALQESQRRQLQSLK-----            | 612 |
| gi  | Mus_musculus_alpha           | -----KALE-KQNNAYNMHSIRSS TSAK-----                 | 486 |
| gi  | Rattus_norvegicus_alpha      | -----KALE-KQNNAYNMHSILSNTSAQ-----                  | 486 |
| gi  | Macaca_mulatta_alpha         | -----KALE-KQNSAYNMHSILSNTSAE-----                  | 486 |
| gi  | Homo_sapiens_alpha           | -----KALE-KQNSAYNMHSILSNTSAE-----                  | 486 |
| gi  | Ovis_aries_alpha             | -----KALE-KQNSAYNMHSILSNTNDG-----                  | 489 |
| gi  | Bos_taurus_alpha             | -----KALE-KQNSAYNMHSILSNTNDG-----                  | 489 |
| gi  | Felis_catus_alpha            | -----KALE-KQNSAYNMHSILSNTSDE-----                  | 402 |

Figure S1. Cont.

|     |                                |                                                         |     |
|-----|--------------------------------|---------------------------------------------------------|-----|
| gi  | Canis_lupus_familiaris_alph    | -----KALE-KQNSAYNMHSILSNTSDE-----                       | 402 |
| gi  | Falco_peregrinus_alpha         | -----KAMAEKQNSTHNVLNNAHN-TSAK-----                      | 476 |
| gi  | Gallus_gallus_alpha            | -----KAMAEKQNSTHNVLNNAHN-TSAK-----                      | 476 |
| gi  | Alligator_mississippiensis     | -----KVLAEKQNSTHNVLNQNNNTSAK-----                       | 487 |
| gi  | Chrysemys_picta_bellii_alph    | -----KTLVEKQNSTHNVLNNAHNNTSAK-----                      | 477 |
| gi  | Xenopus_laevis_alpha           | -----KALADKQNP TLCVQNIQNNASAK-----                      | 476 |
| gi  | Xenopus_tropicalis_alpha       | -----KTLADKQNPALCVQNIQNNASAK-----                       | 476 |
| gi  | Ambystoma_mexicanum_alpha      | -----KALAEKQKFHHNVQNAQKNTIAK-----                       | 403 |
| gi  | Danio_rerio_alpha              | -----EVLMIQNNRHDHSLTTTTSIKNNEHD                         | 483 |
| gi  | Petromyzon_marinus_S4RHV1      | -----NFQN-----NILVK-----                                | 463 |
| gi  | Mus_musculus_epsilon           | -----RGLR-----RDGI IPT-----                             | 467 |
| gi  | Rattus_norvegicus_epsilon      | -----RGLR-----RDGI IPT-----                             | 467 |
| gi  | Macaca_mulatta_epsilon         | -----RGLR-----RDGI IPT-----                             | 467 |
| gi  | Homo_sapiens_epsilon           | -----RGLR-----RDGI IPT-----                             | 467 |
| gi  | Ovis_aries_epsilon             | -----RGLR-----RDGI IPT-----                             | 467 |
| gi  | Bos_taurus_epsilon             | -----RGLR-----RDGI IPT-----                             | 467 |
| gi  | Canis_lupus_familiaris_epsilon | -----RGLR-----RDGI IPT-----                             | 467 |
| gi  | Falco_peregrinus_epsilon       | -----RGLR-----RDGI IPT-----                             | 467 |
| gi  | Gallus_gallus_epsilon          | -----RGLR-----RDGI IPT-----                             | 467 |
| gi  | Felis_catus_epsilon            | -----RGLR-----RDGI IPT-----                             | 467 |
| gi  | Chrysemys_picta_bellii_epsilon | -----RGLR-----RDGI IPT-----                             | 462 |
| gi  | Xenopus_laevis_epsilon         | -----RGLR-----SDGI IPT-----                             | 467 |
| gi  | Xenopus_tropicalis_epsilon     | -----RGLR-----SDGI IPT-----                             | 462 |
| gi  | Alligator_mississippiensis     | -----RGLR-----RDGI IPT-----                             | 500 |
| gi  | Ambystoma_mexicanum_epsilon    | -----RGIQN-----SDGVIPT-----                             | 468 |
| gi  | Danio_rerio_epsilon            | -----RLQGTQGAKEAPVPRPTQVAASGGQS-                        | 497 |
| gi  | Mus_musculus_beta              | -----RLQGTQGAKEAPVPRPTQVAASGGQS-                        | 497 |
| gi  | Rattus_norvegicus_beta         | -----RLQGTQGAKEAPVPRPTQVAASGGQS-                        | 497 |
| gi  | Felis_catus_beta               | -----RLQGTQGAKEAPLQRLTPQVATSGGQS-                       | 497 |
| gi  | Canis_lupus_familiaris_beta    | -----RLQGTQGAKEAPLQRLTPQVATSGGQS-                       | 497 |
| gi  | Homo_sapiens_beta              | -----RLQGTQGAKEAPLQRLTPQVAASGGQS-                       | 497 |
| gi  | Bos_taurus_beta                | -----RLQGTQGAKEAPLQRLTPQVTG-GGQS-                       | 496 |
| gi  | Ovis_aries_beta                | -----RLQGTQGAKEAPLQRLTPQVTG-GGQS-                       | 496 |
| gi  | Macaca_mulatta_beta            | -----RLQGTQGAKEAPLQRLTPQVATSGGQS-                       | 461 |
| gi  | Xenopus_laevis_beta            | -----RLRGLEEAQMNRLNLQHGHSPKT-----                       | 493 |
| gi  | Alligator_mississippiensis     | -----KLQGLEEAQMNRLNLQHSGLQSGNKS-                        | 497 |
| gi  | Chrysemys_picta_bellii_beta    | -----KMNGLEEAQMNQLNLQHSRGSKS-----                       | 491 |
| gi  | Xenopus_tropicalis_beta        | -----RLQSLTEASRNQKNLQERENTAKSQSDT                       | 497 |
| gi  | Danio_rerio_beta               | -----RLRSLEEAQMNRLNLQNSLSMQSSSKS-                       | 366 |
| gi  | Ambystoma_mexicanum_beta       | -----QSPNNNSARAAGTS-----                                | 247 |
| gi  | Petromyzon_marinus_S4RGA7      | -----HLN---NQTNSS-----                                  | 461 |
| gi  | Strongylocentrotus_purpurat    | -----PPSSAGLSNHQQQSSNGSSGSLSSGGAGG                      | 506 |
| jgi | Branchiostoma_floridae_237     | -----KTGNSSEPGT-----                                    | 470 |
| gi  | Hydra_vulgaris_alpha           | -----PPMSPNSAPPGDRGANYSPYSPTAHLMA                       | 460 |
| jgi | Branchiostoma_floridae_112     | -----LFPEKLT DY LKKDGNMTPLPVATAGGGD                     | 521 |
| jgi | Branchiostoma_floridae_284     | -----HDMKLAKK-----                                      | 482 |
| gi  | Caenorhabditis_elegans_PPTR    | -----QAQRDQKK-DRPLMRKSEL PQDIY TMKALE                   | 510 |
| gi  | Amphimedon_queenslandica_be    | -----QAQRDQKK-DRPLMRKSEL PQDIY TMKALE                   | 435 |
| gi  | Chrysemys_picta_bellii_gamm    | -----QAQKDQKK-DRPLVRRKSEL PQDIY TMKALE                  | 510 |
| gi  | Chrysemys_picta_bellii_delt    | -----QAQKDQKK-DRPLVRRKSEL PQDIY TMKALE                  | 435 |
| gi  | Falco_peregrinus_gamma         | -----QAQKDQKK-DRPLVRRKSEL PQDIY TMKALE                  | 510 |
| gi  | Falco_peregrinus_delta/gamm    | -----QAQKDQKK-DRPLVRRKSEL PQDIY TMKALE                  | 435 |
| gi  | Gallus_gallus_gamma            | -----QAQKDQKK-DRPLVRRKSEL PQDIY TMKALE                  | 510 |
| gi  | Alligator_mississippiensis     | -----QAQKDQKK-DRPLVRRKSEL PQDIY TMKALE                  | 510 |
| gi  | Alligator_mississippiensis     | -----QAQKDQKK-DRPLVRRKSEL PQDIY TMKALE                  | 435 |
| gi  | Ambystoma_mexicanum_gamma      | -----LALKDIKK-ERPIVRRKSEL PQDIY TMKALE                  | 511 |
| gi  | Mus_musculus_gamma             | -----EKSHDSHASQEGVETDWAQAQKELKK-DRPLVRRKSEL PQDPHTEKALE | 535 |
| gi  | Rattus_norvegicus_gamma        | -----QAQKDLKK-DRPLVRRKSEL PQDPHTEKALE                   | 510 |
| gi  | Ovis_aries_gamma               | -----QAQKDPKK-ERPLARRKSEL PQDLHTKSALE                   | 510 |
| gi  | Bos_taurus_gamma               | -----QAQKDPKK-ERPLARRKSEL PQDLHTKSALE                   | 510 |

Figure S1. Cont.

|     |                              |                                                   |     |
|-----|------------------------------|---------------------------------------------------|-----|
| gi  | Canis_lupus_familiaris_gamm  | -----QAQKDLKK-DRPGVRRKPELPQDPHTKNALE              | 510 |
| gi  | Macaca_mulatta_gamma         | -----QAQKDPKK-DRPLARRKSELPQDPHTTKALE              | 510 |
| gi  | Homo_sapiens_gamma           | -----QAQKDPKK-DRPLARRKSELPQDPHTTKALE              | 500 |
| gi  | Felis_catus_gamma            | -----QAQKDLKK-DRPLVRRKSELPQDLHTKNALE              | 518 |
| gi  | Canis_lupus_familiaris_delt  | -----RQAQKDLKK-DRPGVRRKPELPQDPHTKNALE             | 557 |
| gi  | Macaca_mulatta_delta/gamma   | -----HQAQKDPKK-DRPLARRKSELPQDPHTTKALE             | 792 |
| gi  | Bos_taurus_delta/gamma       | -----RQAQKDPKK-ERPLARRKSELPQDLHTKSALE             | 564 |
| gi  | Mus_musculus_delta/gamma     | EKSHDSHASQEGVETDWAQAQKELKK-DRPLVRRKSELPQDPHTEKALE | 592 |
| gi  | Rattus_norvegicus_delta/gam  | -----RQAQKDLKK-DRPLVRRKSELPQDPHTEKALE             | 633 |
| gi  | Danio_rerio_gamma            | -----PLHREQRK-ERPLMRRKSELPQDTSTVKALE              | 510 |
| gi  | Danio_rerio_delta/gamma      | -----PLHREQRK-ERPLMRRKSELPQDTSTVKALE              | 563 |
| gi  | Xenopus_laevis_delta/gamma   | -----                                             |     |
| gi  | Xenopus_laevis_gamma         | -----                                             |     |
| gi  | Xenopus_tropicalis_delta/ga  | -----QAQKDLKK-ERPLVRRKSELPQDIYTMKALE              | 563 |
| gi  | Mus_musculus_delta           | -----QMLKDIKK-DKVLVRRKSELPQDVYTIKALE              | 578 |
| gi  | Rattus_norvegicus_delta      | -----QMLKDIKK-DKVLVRRKSELPQDVYTIKALE              | 606 |
| gi  | Felis_catus_delta            | -----QMLKDIKK-EKVLLRRKSELPQDVYTIKALE              | 592 |
| gi  | Bos_taurus_delta             | -----QMLKDIKK-EKVLLRRKSELPQDVYTIKALE              | 584 |
| gi  | Canis_lupus_familiaris_delt  | -----QMLKDIKK-EKVLLRRKSELPQDVYTIKALE              | 579 |
| gi  | Macaca_mulatta_delta         | -----QMLKDIKK-EKVLLRRKSELPQDVYTIKALE              | 595 |
| gi  | Homo_sapiens_delta           | -----QMLKDIKK-EKVLLRRKSELPQDVYTIKALE              | 586 |
| gi  | Ovis_aries_delta             | -----QMLKDIKK-EKVLLRRKSELPQDVYTIKALE              | 583 |
| gi  | Falco_peregrinus_delta       | -----QMLKDIKK-EKALLRRKSELPQDVYTIKALE              | 486 |
| gi  | Gallus_gallus_delta          | -----QMLKDIKK-EKVLLRRKSELPQDVYTIKALE              | 581 |
| gi  | Alligator_mississippiensis   | -----QMLKDIKK-EKVLLHRKSELPQDVYTIKALE              | 580 |
| gi  | Chrysemys_picta_bellii_delt  | -----QMLKDIKK-EKVLLRRKSELPQDVYTIKALE              | 582 |
| gi  | Danio_rerio_delta            | -----QGMKEIKK-DKVLVRRKSELPQDVYTIKALE              | 585 |
| gi  | Ambystoma_mexicanum_delta    | -----                                             |     |
| gi  | Petromyzon_marinus_S4RN43    | -----QVQNSKGEGKKVLLRSKSELPQEMSTMRALE              | 558 |
| jgi | Branchiostoma_floridiae_237  | -----QAGVSRGKDLKKMLPRRKSELPDLSLTMRALE             | 485 |
| jgi | Branchiostoma_floridiae_252  | -----FPQAGVSRGKDLKKMLPRRKSELPDLSLTMRALE           | 539 |
| gi  | Strongylocentrotus_purpurat  | -----RKSELPRDAFTIKAIG                             | 509 |
| gi  | Caenorhabditis_elegans_PPTR  | -----GVSSMK-NDMDFGPNHKQSDFFPDEQTTKALG             | 539 |
| gi  | Hydra_vulgaris_delta         | -----                                             |     |
| gi  | Amphimedon_queenslandica_de  | -----NTGAVKTNNKGHMLIRRKSYLPMDNDTSQALQ             | 611 |
| gi  | Drosophila_melanogaster_B56  | -----AYDQSEQRARQPPPPPLPPQKAHQEPR                  | 655 |
| gi  | Dictyostelium_discoideum_ps  | -INNINNINNINNNGSTETKADKP-----SMIRRKSLLPVDPSTIAALS | 577 |
| gi  | Dictyostelium_purpureum_N/A  | -----IETKSDKP-----SMIRRKSLLPVDPSTIAALS            | 513 |
| gi  | Dictyostelium_fasciculatum   | -----QHMQQQQQPQTQPSKASMIIRRKSLLPVDPSTIAALS        | 552 |
| gi  | Polysphondylium_pallidum_N/  | -----ALPENGEKP-----ISMIRRKSLLPVDPSTIAALS          | 492 |
| gi  | Arabidopsis_thaliana_theta   | -----LEEIGNQKQ--KSSL----                          | 492 |
| gi  | Arabidopsis_thaliana_eta     | -----LEELGVRKA--S-----                            | 529 |
| gi  | Arabidopsis_thaliana_zeta    | -----LEDLATSKTVVTNEAVLVP                          | 528 |
| gi  | Arabidopsis_thaliana_gamma   | -----LEELAASKS-VSNEAVLVP                          | 506 |
| gi  | Oryza                        | -----LEEVASAKA-TSGEAVLIS                          | 507 |
| gi  | Oryza_sativa_zeta            | -----LEEMASAKA-TSGAAVLVS                          | 507 |
| gi  | Oryza_sativa_theta           | -----LEEIASSKT-ISSEPAVPP                          | 511 |
| gi  | Oryza_sativa_eta             | -----LEEAAVPRS-DNNNPVGTP                          | 500 |
| gi  | Arabidopsis_thaliana_delta   | -----LEEIVASMAK-----                              | 477 |
| gi  | Arabidopsis_thaliana_N/A     | -----LENAASMKPITGKTAVLVT                          | 492 |
| gi  | Oryza_sativa_kappa           | -----LESAAAFQPVGTGHTAVLVG                         | 498 |
| gi  | Oryza_sativa_N/A             | -----LERNASFRPVTGDIGFSVL                          | 479 |
| gi  | Arabidopsis_thaliana_alpha   | -----LDEAVEERE-----REDPMI                         | 493 |
| gi  | Arabidopsis_thaliana_beta    | -----LAEAAAERDGGGGEDHMI                           | 497 |
| gi  | Oryza_sativa_N/A_2           | -----LEAAAAKAS-----GDDMVL                         | 533 |
| gi  | Arabidopsis_thaliana_epsilon | -----LEEAAASLAN-----                              | 497 |
| gi  | Chlamydomonas_reinhardtii_w  | -----LQKLAVQKSNRPLPEVKP                           | 495 |
| gi  | Schizosaccharomyces_pombe_P  | -----AMKLKSQNPPTTVHSTTERL                         | 538 |
| gi  | Schizosaccharomyces_pombe_P  | -----NKPTDYL                                      | 626 |
| gi  | Ashbya_gossypii_RTSl         | -----LHIS-----SVDNPAVDRIGTGDLH                    | 630 |
| gi  | Saccharomyces_cerevisiae_RT  | -----LRINNDKQYTIKNPELRNSFNTASEN                   | 741 |

Figure S1. Cont.



|                                   |                                |     |
|-----------------------------------|--------------------------------|-----|
| gi Aspergillus_niger_N/A          | LDDSSSTERRPRESTASSVSTERPE----- | 635 |
| gi Aspergillus_nidulans_parA      | LDEAGSKDRRPREGSITSP-----       | 631 |
| gi Mus_musculus_alpha             | -----                          |     |
| gi Rattus_norvegicus_alpha        | -----                          |     |
| gi Macaca_mulatta_alpha           | -----                          |     |
| gi Homo_sapiens_alpha             | -----                          |     |
| gi Ovis_aries_alpha               | -----                          |     |
| gi Bos_taurus_alpha               | -----                          |     |
| gi Felis_catus_alpha              | -----                          |     |
| gi Canis_lupus_familiaris_alph    | -----                          |     |
| gi Falco_peregrinus_alpha         | -----                          |     |
| gi Gallus_gallus_alpha            | -----                          |     |
| gi Alligator_mississippiensis_    | -----                          |     |
| gi Chrysemys_picta_bellii_alph    | -----                          |     |
| gi Xenopus_laevis_alpha           | -----                          |     |
| gi Xenopus_tropicalis_alpha       | -----                          |     |
| gi Ambystoma_mexicanum_alpha      | -----                          |     |
| gi Danio_rerio_alpha              | I-----                         | 484 |
| gi Petromyzon_marinus_S4RHV1      | -----                          |     |
| gi Mus_musculus_epsilon           | -----                          |     |
| gi Rattus_norvegicus_epsilon      | -----                          |     |
| gi Macaca_mulatta_epsilon         | -----                          |     |
| gi Homo_sapiens_epsilon           | -----                          |     |
| gi Ovis_arie_epsilon              | -----                          |     |
| gi Bos_taurus_epsilon             | -----                          |     |
| gi Canis_lupus_familiaris_epsilon | -----                          |     |
| gi Falco_peregrinus_epsilon       | -----                          |     |
| gi Gallus_gallus_epsilon          | -----                          |     |
| gi Felis_catus_epsilon            | -----                          |     |
| gi Chrysemys_picta_bellii_epsilon | -----                          |     |
| gi Xenopus_laevis_epsilon         | -----                          |     |
| gi Xenopus_tropicalis_epsilon     | -----                          |     |
| gi Alligator_mississippiensis_    | -----                          |     |
| gi Ambystoma_mexicanum_epsilon    | -----                          |     |
| gi Danio_rerio_epsilon            | -----                          |     |
| gi Mus_musculus_beta              | -----                          |     |
| gi Rattus_norvegicus_beta         | -----                          |     |
| gi Felis_catus_beta               | -----                          |     |
| gi Canis_lupus_familiaris_beta    | -----                          |     |
| gi Homo_sapiens_beta              | -----                          |     |
| gi Bos_taurus_beta                | -----                          |     |
| gi Ovis_aries_beta                | -----                          |     |
| gi Macaca_mulatta_beta            | -----                          |     |
| gi Xenopus_laevis_beta            | -----                          |     |
| gi Alligator_mississippiensis_    | -----                          |     |
| gi Chrysemys_picta_bellii_beta    | -----                          |     |
| gi Xenopus_tropicalis_beta        | -----                          |     |
| gi Danio_rerio_beta               | SAANTT-----                    | 503 |
| gi Ambystoma_mexicanum_beta       | -----                          |     |
| gi Petromyzon_marinus_S4RGA7      | -----                          |     |
| gi Strongylocentrotus_purpurat    | -----                          |     |
| gi Drosophila_melanogaster_wdb    | DNNPATTNAKIKQDKADN----         | 524 |
| jgi Branchiostoma_floridae_237    | -----                          |     |
| gi Hydra_vulgaris_alpha           | -----                          |     |
| jgi Branchiostoma_floridae_112    | -----                          |     |
| jgi Branchiostoma_floridae_284    | K-----                         | 461 |
| gi Caenorhabditis_elegans_FPTR    | KSPSVVKKSSSTGSETTTPAKK-----    | 542 |
| gi Amphimedon_queenslandica_be    | -----                          |     |
| gi Chrysemys_picta_bellii_gamm    | SHCRADELI-SHDGH-----           | 524 |

Figure S1. Cont.

|                                |                                                   |     |
|--------------------------------|---------------------------------------------------|-----|
| gi Chrysemys_picta_bellii_delt | SHCRADELI-SHDGH-----                              | 449 |
| gi Falco_peregrinus_gamma      | SHCRADELI-SHDGQ-----                              | 524 |
| gi Falco_peregrinus_delta/gamm | SHCRADELI-SHDGQ-----                              | 449 |
| gi Gallus_gallus_gamma         | SHCRADELI-SHDGH-----                              | 524 |
| gi Alligator_mississippiensis_ | SHCRADELI-SHDGH-----                              | 524 |
| gi Alligator_mississippiensis_ | SHCRADELI-SHDGH-----                              | 449 |
| gi Ambystoma_mexicanum_gamma   | SHCRADELL-THDAH-----                              | 525 |
| gi Mus_musculus_gamma          | AHCRASELL-SQDGR-----                              | 549 |
| gi Rattus_norvegicus_gamma     | AHCRASELL-SQDGR-----                              | 524 |
| gi Ovis_aries_gamma            | -----                                             |     |
| gi Bos_taurus_gamma            | AHGRAEIPA-PQDGR-----                              | 524 |
| gi Canis_lupus_familiaris_gamm | AHCRADELV-SQDGR-----                              | 524 |
| gi Macaca_mulatta_gamma        | AHCRADELA-SQDGR-----                              | 524 |
| gi Homo_sapiens_gamma          | AHCRADELA-SQDGR-----                              | 514 |
| gi Felis_catus_gamma           | AHCRADQLV-SQDGR-----                              | 532 |
| gi Canis_lupus_familiaris_delt | AHCRADELV-SQDGR-----                              | 571 |
| gi Macaca_mulatta_delta/gamma  | AHCRADELA-SQDGR-----                              | 806 |
| gi Bos_taurus_delta/gamma      | AHGRAEIPA-PQDGR-----                              | 578 |
| gi Mus_musculus_delta/gamma    | AHCRASELL-SQDGR-----                              | 606 |
| gi Rattus_norvegicus_delta/gam | AHCRASELL-SQDGR-----                              | 647 |
| gi Danio_rerio_gamma           | THHRAEDMIGTQDGH-----                              | 525 |
| gi Danio_rerio_delta/gamma     | THHRAEDMIGTQDGH-----                              | 578 |
| gi Xenopus_laevis_delta/gamma  | -----                                             |     |
| gi Xenopus_laevis_gamma        | -----                                             |     |
| gi Xenopus_tropicalis_delta/ga | SHCRADELISHDGH-----                               | 577 |
| gi Mus_musculus_delta          | AHKRAEEFLTASQEAL-----                             | 594 |
| gi Rattus_norvegicus_delta     | AHKRAEEFLTASQEAL-----                             | 622 |
| gi Felis_catus_delta           | AHKRAEEFLTASQEAL-----                             | 608 |
| gi Bos_taurus_delta            | AHKRAEEFLTASQEAL-----                             | 600 |
| gi Canis_lupus_familiaris_delt | AHKRAEEFLTASQEAL-----                             | 595 |
| gi Macaca_mulatta_delta        | AHKRAEEFLTASQEAL-----                             | 611 |
| gi Homo_sapiens_delta          | AHKRAEEFLTASQEAL-----                             | 602 |
| gi Ovis_aries_delta            | AHKRAEEFLTASQEAL-----                             | 599 |
| gi Falco_peregrinus_delta      | AHKRAEEFLTSSQEAL-----                             | 502 |
| gi Gallus_gallus_delta         | AHKRAEEFLTSNQEAL-----                             | 597 |
| gi Alligator_mississippiensis_ | AHKRAEEFLTSSQEAL-----                             | 596 |
| gi Chrysemys_picta_bellii_delt | AHKRAEEFLTSSQEAL-----                             | 598 |
| gi Danio_rerio_delta           | AHKRAEEYLTAHQEAL-----                             | 601 |
| gi Ambystoma_mexicanum_delta   | -----                                             |     |
| gi Petromyzon_marinus_S4RN43   | VHRAEEYLSTSH-----                                 | 572 |
| jgi Branchiostoma_floridae_237 | DHKRADDYLTTSFETS-----                             | 501 |
| jgi Branchiostoma_floridae_252 | DHKRADDYLTTSFETS-----                             | 555 |
| gi Strongylocentrotus_purpurat | THKRHEEFLVASPETNS-----                            | 526 |
| gi Caenorhabditis_elegans_PPTR | EYKRHDPFLKKVTSTDEQ-----                           | 557 |
| gi Hydra_vulgaris_delta        | -----                                             |     |
| gi Amphimedon_queenslandica_de | QYKPERHLGVPNES-----                               | 625 |
| gi Drosophila_melanogaster_B56 | EVQRALATLTTLNNY-----                              | 670 |
| gi Dictyostelium_discoideum_ps | SHRSLEDIMSTNSNS---GNDDDDENNHTNHDSEIENEVKEDFRVPPNN | 623 |
| gi Dictyostelium_purpureum_N/A | NHRSLEEIISNKNEN---SNDNNDE-----EVKEDSLHYVPY        | 548 |
| gi Dictyostelium_fasciculatum_ | SHRSLEDIVHSSDSEMNCCTDDNNADQQPNN-----DYNGDHKTSTSK  | 595 |
| gi Polysphondylium_pallidum_N/ | NHRSLEGLVHSGDG-----DHDAEETEML-----YDSSESQVPAI     | 528 |
| gi Arabidopsis_thaliana_theta  | -----                                             |     |
| gi Arabidopsis_thaliana_eta    | -----                                             |     |
| gi Arabidopsis_thaliana_zeta   | RFVSSVNLTTSSSESTGS-----                           | 546 |
| gi Arabidopsis_thaliana_gamma  | RFSSSVTLATG--KTSGS-----                           | 522 |
| gi Oryza                       | PSLARTSSLV-----                                   | 517 |
| gi Oryza_sativa_zeta           | RTLPRQSSAV-----                                   | 517 |
| gi Oryza_sativa_theta          | EATVH-----                                        | 516 |
| gi Oryza_sativa_eta            | NGKFSQAAG-----                                    | 509 |
| gi Arabidopsis_thaliana_delta  | -----                                             |     |
| gi Arabidopsis_thaliana_N/A    | --PRATSIAC-----                                   | 500 |

Figure S1. Cont.

|    |                              |                       |     |
|----|------------------------------|-----------------------|-----|
| gi | Oryza_sativa_kappa           | RQPSANLIATLI-----     | 510 |
| gi | Oryza_sativa_N/A             | P-ASAPLVAPTMT-----    | 491 |
| gi | Arabidopsis_thaliana_alpha   | TS-----               | 495 |
| gi | Arabidopsis_thaliana_beta    | TS-----               | 499 |
| gi | Oryza_sativa_N/A_2           | VN-----               | 535 |
| gi | Arabidopsis_thaliana_epsilon | -----                 |     |
| gi | Chlamydomonas_reinhardtii_w  | LSALLRV-----          | 502 |
| gi | Schizosaccharomyces_pombe_P  | KKLSLDY TNG-----      | 548 |
| gi | Schizosaccharomyces_pombe_P  | R-----                | 627 |
| gi | Ashbya_gossypii_RTSl         | -----                 |     |
| gi | Saccharomyces_cerevisiae_RT  | NTLNEENENDCDSEIQ----- | 757 |

|    |                                |       |
|----|--------------------------------|-------|
| gi | Aspergillus_niger_N/A          | ----- |
| gi | Aspergillus_nidulans_para      | ----- |
| gi | Mus_musculus_alpha             | ----- |
| gi | Rattus_norvegicus_alpha        | ----- |
| gi | Macaca_mulatta_alpha           | ----- |
| gi | Homo_sapiens_alpha             | ----- |
| gi | Ovis_aries_alpha               | ----- |
| gi | Bos_taurus_alpha               | ----- |
| gi | Felis_catus_alpha              | ----- |
| gi | Canis_lupus_familiaris_alph    | ----- |
| gi | Falco_peregrinus_alpha         | ----- |
| gi | Gallus_gallus_alpha            | ----- |
| gi | Alligator_mississippiensis     | ----- |
| gi | Chrysemys_picta_bellii_alph    | ----- |
| gi | Xenopus_laevis_alpha           | ----- |
| gi | Xenopus_tropicalis_alpha       | ----- |
| gi | Ambystoma_mexicanum_alpha      | ----- |
| gi | Danio_rerio_alpha              | ----- |
| gi | Petromyzon_marinus_S4RHV1      | ----- |
| gi | Mus_musculus_epsilon           | ----- |
| gi | Rattus_norvegicus_epsilon      | ----- |
| gi | Macaca_mulatta_epsilon         | ----- |
| gi | Homo_sapiens_epsilon           | ----- |
| gi | Ovis_aries_epsilon             | ----- |
| gi | Bos_taurus_epsilon             | ----- |
| gi | Canis_lupus_familiaris_epsilon | ----- |
| gi | Falco_peregrinus_epsilon       | ----- |
| gi | Gallus_gallus_epsilon          | ----- |
| gi | Felis_catus_epsilon            | ----- |
| gi | Chrysemys_picta_bellii_epsilon | ----- |
| gi | Xenopus_laevis_epsilon         | ----- |
| gi | Xenopus_tropicalis_epsilon     | ----- |
| gi | Alligator_mississippiensis     | ----- |
| gi | Ambystoma_mexicanum_epsilon    | ----- |
| gi | Danio_rerio_epsilon            | ----- |
| gi | Mus_musculus_beta              | ----- |
| gi | Rattus_norvegicus_beta         | ----- |
| gi | Felis_catus_beta               | ----- |
| gi | Canis_lupus_familiaris_beta    | ----- |
| gi | Homo_sapiens_beta              | ----- |
| gi | Bos_taurus_beta                | ----- |
| gi | Ovis_aries_beta                | ----- |
| gi | Macaca_mulatta_beta            | ----- |
| gi | Xenopus_laevis_beta            | ----- |
| gi | Alligator_mississippiensis     | ----- |
| gi | Chrysemys_picta_bellii_beta    | ----- |
| gi | Xenopus_tropicalis_beta        | ----- |
| gi | Danio_rerio_beta               | ----- |

Figure S1. Cont.

|                                |           |
|--------------------------------|-----------|
| gi Ambystoma_mexicanum_beta    | -----     |
| gi Petrymyzon_marinus_S4RGA7   | -----     |
| gi Strongylocentrotus_purpurat | -----     |
| gi Drosophila_melanogaster_wdb | -----     |
| jgi Branchiostoma_floridae_237 | -----     |
| gi Hydra_vulgaris_alpha        | -----     |
| jgi Branchiostoma_floridae_112 | -----     |
| jgi Branchiostoma_floridae_284 | -----     |
| gi Caenorhabditis_elegans_PPTR | -----     |
| gi Amphimedon_queenslandica_be | -----     |
| gi Chrysemys_picta_bellii_gamm | -----     |
| gi Chrysemys_picta_bellii_delt | -----     |
| gi Falco_peregrinus_gamma      | -----     |
| gi Falco_peregrinus_delta/gamm | -----     |
| gi Gallus_gallus_gamma         | -----     |
| gi Alligator_mississippiensis_ | -----     |
| gi Alligator_mississippiensis_ | -----     |
| gi Ambystoma_mexicanum_gamma   | -----     |
| gi Mus_musculus_gamma          | -----     |
| gi Rattus_norvegicus_gamma     | -----     |
| gi Ovis_aries_gamma            | -----     |
| gi Bos_taurus_gamma            | -----     |
| gi Canis_lupus_familiaris_gamm | -----     |
| gi Macaca_mulatta_gamma        | -----     |
| gi Homo_sapiens_gamma          | -----     |
| gi Felis_catus_gamma           | -----     |
| gi Canis_lupus_familiaris_delt | -----     |
| gi Macaca_mulatta_delta/gamma  | -----     |
| gi Bos_taurus_delta/gamma      | -----     |
| gi Mus_musculus_delta/gamma    | -----     |
| gi Rattus_norvegicus_delta/gam | -----     |
| gi Danio_rerio_gamma           | -----     |
| gi Danio_rerio_delta/gamma     | -----     |
| gi Xenopus_laevis_delta/gamma  | -----     |
| gi Xenopus_laevis_gamma        | -----     |
| gi Xenopus_tropicalis_delta/ga | -----     |
| gi Mus_musculus_delta          | -----     |
| gi Rattus_norvegicus_delta     | -----     |
| gi Felis_catus_delta           | -----     |
| gi Bos_taurus_delta            | -----     |
| gi Canis_lupus_familiaris_delt | -----     |
| gi Macaca_mulatta_delta        | -----     |
| gi Homo_sapiens_delta          | -----     |
| gi Ovis_aries_delta            | -----     |
| gi Falco_peregrinus_delta      | -----     |
| gi Gallus_gallus_delta         | -----     |
| gi Alligator_mississippiensis_ | -----     |
| gi Chrysemys_picta_bellii_delt | -----     |
| gi Danio_rerio_delta           | -----     |
| gi Ambystoma_mexicanum_delta   | -----     |
| gi Petrymyzon_marinus_S4RN43   | -----     |
| jgi Branchiostoma_floridae_237 | -----     |
| jgi Branchiostoma_floridae_252 | -----     |
| gi Strongylocentrotus_purpurat | -----     |
| gi Caenorhabditis_elegans_PPTR | -----     |
| gi Hydra_vulgaris_delta        | -----     |
| gi Amphimedon_queenslandica_de | -----     |
| gi Drosophila_melanogaster_B56 | -----     |
| gi Dictyostelium_discoideum_ps | RYTFT 628 |
| gi Dictyostelium_purpureum_N/A | ISQ-- 551 |
| gi Dictyostelium_fasciculatum_ | MIF-- 598 |

Figure S1. Cont.

```

gi|Polysphondylium_pallidum_N/      SQ--- 530
gi|Arabidopsis_thaliana_theta      -----
gi|Arabidopsis_thaliana_eta        -----
gi|Arabidopsis_thaliana_zeta        -----
gi|Arabidopsis_thaliana_gamma       -----
gi|Oryza                             -----
gi|Oryza_sativa_zeta                -----
gi|Oryza_sativa_theta               -----
gi|Oryza_sativa_eta                 -----
gi|Arabidopsis_thaliana_delta        -----
gi|Arabidopsis_thaliana_N/A          -----
gi|Oryza_sativa_kappa                -----
gi|Oryza_sativa_N/A                 -----
gi|Arabidopsis_thaliana_alpha        -----
gi|Arabidopsis_thaliana_beta         -----
gi|Oryza_sativa_N/A_2                -----
gi|Arabidopsis_thaliana_epsilon      -----
gi|Chlamydomonas_reinhardtii_w       -----
gi|Schizosaccharomyces_pombe_P       -----
gi|Schizosaccharomyces_pombe_P       -----
gi|Ashbya_gossypii_RTS1              -----
gi|Saccharomyces_cerevisiae_RT       -----

```

**Figure S1.** A CLUSTAL 2.1 multiple sequence alignment of all analyzed B56 sequences.
